# Supplementary material
Source: publisher site journal article supplement (http://www.spandidos-publications.com/59/downloadSupplementary)
Supplement: Supplementary file 1 [file downloadSupplementary]

## Sheet: 1h vs 0h
Table SI. All differentially expressed proteins prior to (0 h) and following (1-3 h) myocardial infarction.
Accession	Description	Coverage	Proteins	Unique Peptides	Peptides	PSMs	AAs	MW [kDa]	calc. pI	0 h-1/REF	0 h-2/REF	Average 0 h	1 h-1/REF	1 h-2/REF	Average 1 h	1 h/0 h	Significance A
J9NYI6	Uncharacterized protein OS=Canis lupus familiaris GN=LRRIQ1 PE=4 SV=1 - [J9NYI6_CANLF]	0.59	1	1	1	3	1689	196.218	6.31592	0.4441	0.643647	0.543874	3.56869	2.85919	3.21394	5.90935	1.03417e-36
F1PBL4	Fibrinogen alpha chain OS=Canis lupus familiaris GN=FGA PE=4 SV=1 - [F1PBL4_CANLF]	37.33	5	34	34	389	892	96.5827	6.1001	0.547022	0.567392	0.557207	1.43968	1.46488	1.45228	2.60635	8.56008e-12
J9NU17	Uncharacterized protein OS=Canis lupus familiaris GN=MYO1A PE=3 SV=1 - [J9NU17_CANLF]	1.08	2	1	1	2	927	105.725	9.5249	0.433907	0.510199	0.472053	1.69162	0.723877	1.20775	2.5585	2.1282e-11
J9NWS3	Keratin, type I cytoskeletal 9 OS=Canis lupus familiaris GN=KRT9 PE=3 SV=1 - [J9NWS3_CANLF]	2.69	4	1	2	9	595	59.3613	5.31299	0.789265	0.764154	0.77671	1.77096	2.10722	1.93909	2.49654	6.91813e-11
F1PGS2	Fibrinogen beta chain OS=Canis lupus familiaris GN=FGB PE=4 SV=2 - [F1PGS2_CANLF]	70.47	2	29	29	274	491	55.8163	8.1626	0.564064	0.574771	0.569417	1.38923	1.44825	1.41874	2.49157	7.6045e-11
F1P8G0	Fibrinogen gamma chain OS=Canis lupus familiaris GN=FGG PE=4 SV=2 - [F1P8G0_CANLF]	59.5	2	25	25	306	437	49.2859	6.12549	0.639198	0.600235	0.619716	1.26548	1.27421	1.26984	2.04907	3.11561e-07
F1P8A6	Uncharacterized protein OS=Canis lupus familiaris GN=VSIG4 PE=4 SV=2 - [F1P8A6_CANLF]	8.27	2	2	2	11	399	44.4324	6.82959	0.596898	0.690112	0.643505	1.42278	1.19089	1.30684	2.03081	4.35879e-07
F1PYZ1	Uncharacterized protein OS=Canis lupus familiaris GN=LOC485255 PE=3 SV=2 - [F1PYZ1_CANLF]	14.09	1	1	2	54	149	16.6116	7.1958	0.648158	0.677591	0.662875	1.45736	1.20452	1.33094	2.00783	6.6413e-07
F1Q0N9	Uncharacterized protein OS=Canis lupus familiaris GN=KRT19 PE=3 SV=1 - [F1Q0N9_CANLF]	8.52	25	2	5	9	399	43.8582	5.26221	0.73386	0.582668	0.658264	1.11876	1.26693	1.19284	1.81211	2.22089e-05
E2RP87	Uncharacterized protein OS=Canis lupus familiaris GN=LOC478984 PE=4 SV=1 - [E2RP87_CANLF]	3.21	1	1	1	2	249	27.9924	9.15869	0.61879	0.696009	0.657399	1.1299	1.24211	1.186	1.80408	2.55533e-05
P60524	Hemoglobin subunit beta OS=Canis lupus familiaris GN=HBB PE=1 SV=1 - [HBB_CANLF]	92.47	5	5	16	746	146	15.9864	8.04541	0.486537	0.462007	0.474272	0.883755	0.822581	0.853168	1.7989	2.79716e-05
F1PGC3	Uncharacterized protein OS=Canis lupus familiaris GN=IFIT2 PE=4 SV=2 - [F1PGC3_CANLF]	3.63	3	2	2	11	468	54.0843	7.47412	0.375061	0.362432	0.368747	0.610844	0.662058	0.636451	1.72598	9.82757e-05
J9P0D4	Uncharacterized protein OS=Canis lupus familiaris GN=IGKV2D-26 PE=4 SV=1 - [J9P0D4_CANLF]	14.89	1	2	3	38	141	15.5068	8.30908	0.811025	0.748331	0.779678	1.65223	0.998683	1.32546	1.70001	0.00015257
E2REU6	Uncharacterized protein OS=Canis lupus familiaris GN=KRT18 PE=3 SV=2 - [E2REU6_CANLF]	3.58	13	1	2	3	447	49.7624	5.52881	0.835018	0.810355	0.822686	1.38944	1.34554	1.36749	1.66223	0.000286865
J9JHF7	Uncharacterized protein OS=Canis lupus familiaris GN=LOC100855540 PE=3 SV=1 - [J9JHF7_CANLF]	91.55	2	1	11	464	142	15.3689	8.06006	0.326931	0.4609	0.393916	0.594187	0.676792	0.63549	1.61326	0.000640127
F1PDY8	Uncharacterized protein OS=Canis lupus familiaris GN=CA2 PE=4 SV=2 - [F1PDY8_CANLF]	33.08	1	8	8	30	260	29.2417	7.18115	0.539863	0.588748	0.564305	0.851179	0.858535	0.854857	1.51488	0.003016
P60529	Hemoglobin subunit alpha OS=Canis lupus familiaris GN=HBA PE=1 SV=1 - [HBA_CANLF]	92.2	3	1	11	608	141	15.2079	8.06006	0.436232	0.405718	0.420975	0.637551	0.623023	0.630287	1.49721	0.00394463
F1PPB6	Uncharacterized protein OS=Canis lupus familiaris GN=DERA PE=4 SV=2 - [F1PPB6_CANLF]	4.4	1	1	1	2	318	35.2327	8.95361	0.858713	0.965281	0.911997	1.37459	1.30945	1.34202	1.47152	0.00579194
F1PTY1	Keratin, type II cytoskeletal 1 OS=Canis lupus familiaris GN=KRT1 PE=3 SV=1 - [F1PTY1_CANLF]	13.73	2	7	9	34	619	63.675	7.84033	0.922809	0.923421	0.923115	1.35813	1.34272	1.35042	1.4629	0.00657734
E2R489	Uncharacterized protein OS=Canis lupus familiaris GN=KRT84 PE=3 SV=1 - [E2R489_CANLF]	4.27	24	1	3	6	586	63.3318	8.00146	0.939762	0.912353	0.926057	1.30994	1.36029	1.33511	1.44172	0.00895696
C4MW55	Cytochrome c oxidase subunit 2 OS=Canis lupus familiaris GN=COX2 PE=3 SV=1 - [C4MW55_CANLF]	4.41	1	1	1	5	227	26.0561	4.729	1.14985	1.34714	1.2485	1.46473	2.10026	1.78249	1.42771	0.0109524
J9JHZ3	Uncharacterized protein OS=Canis lupus familiaris GN=LOC476825 PE=3 SV=1 - [J9JHZ3_CANLF]	72.37	4	3	14	612	152	16.7166	8.01611	0.70899	0.656428	0.682709	0.951507	0.992566	0.972037	1.42379	0.0115817
J9P9B9	Uncharacterized protein OS=Canis lupus familiaris PE=4 SV=1 - [J9P9B9_CANLF]	19.05	1	1	2	43	126	13.5476	6.75635	0.728308	0.693958	0.711133	0.966195	1.00177	0.983983	1.38368	0.0202751
F1P8T3	Uncharacterized protein OS=Canis lupus familiaris GN=SEMA7A PE=4 SV=2 - [F1P8T3_CANLF]	3.57	1	1	1	2	561	63.6262	6.75635	0.934692	0.963303	0.948997	1.14652	1.46094	1.30373	1.3738	0.0231975
F6X5M3	Uncharacterized protein OS=Canis lupus familiaris GN=CLTB PE=4 SV=1 - [F6X5M3_CANLF]	3.93	1	1	1	6	229	25.1452	4.64014	0.332605	0.5499	0.441252	0.462997	0.746323	0.60466	1.37033	0.0243116
E2R5U8	Transthyretin OS=Canis lupus familiaris GN=TTR PE=3 SV=1 - [E2R5U8_CANLF]	71.43	2	10	10	91	147	15.8582	6.91748	0.81464	0.707352	0.760996	1.02323	1.06029	1.04176	1.36894	0.0247709
F1PBK6	Uncharacterized protein OS=Canis lupus familiaris GN=CA1 PE=4 SV=2 - [F1PBK6_CANLF]	18.39	1	3	3	15	261	28.9765	7.12256	0.669214	0.79843	0.733822	0.80599	1.19345	0.999719	1.36234	0.0270655
E2RL75	Uncharacterized protein OS=Canis lupus familiaris GN=INTS4 PE=4 SV=1 - [E2RL75_CANLF]	1.24	1	1	1	3	964	108.197	6.49365	0.858958	1.12405	0.991504	1.18693	1.44731	1.31712	1.32841	0.0422557
F1PEH9	Uncharacterized protein OS=Canis lupus familiaris GN=ACSL4 PE=4 SV=2 - [F1PEH9_CANLF]	1.04	1	1	1	2	670	74.3769	8.01611	1.05872	0.989984	1.02435	0.362856	0.456457	0.409657	0.399918	1.52734e-12
Q0QEN2	ATP synthase subunit beta (Fragment) OS=Canis lupus familiaris GN=ATP5B PE=2 SV=1 - [Q0QEN2_CANLF]	7.17	2	2	2	3	321	34.6651	5.41455	1.25023	1.72826	1.48924	0.884917	0.886141	0.885529	0.594617	6.15406e-05
E2QUY2	Uncharacterized protein OS=Canis lupus familiaris GN=ABRACL PE=4 SV=1 - [E2QUY2_CANLF]	16.05	1	1	1	3	81	9.05486	6.29053	1.24124	1.52428	1.38276	0.841254	0.824365	0.83281	0.602281	9.31162e-05
E2R7Z9	Uncharacterized protein OS=Canis lupus familiaris GN=ACOT11 PE=4 SV=2 - [E2R7Z9_CANLF]	2.69	2	1	1	2	558	63.0097	7.75244	1.33473	0.729318	1.03203	0.764591	0.534577	0.649584	0.629426	0.000360808
F1P6P2	Transgelin OS=Canis lupus familiaris GN=TAGLN2 PE=3 SV=2 - [F1P6P2_CANLF]	17.09	1	3	3	5	199	22.3632	8.25049	1.29554	1.60013	1.44783	0.923861	0.903112	0.913487	0.630933	0.000387097
Q9MZD3	Peptidyl-prolyl cis-trans isomerase (Fragment) OS=Canis lupus familiaris PE=2 SV=1 - [Q9MZD3_CANLF]	12.82	8	2	2	7	156	16.9224	8.1626	1.31323	1.31599	1.31461	0.837485	0.890375	0.86393	0.657175	0.00122144
J9NYN2	Uncharacterized protein OS=Canis lupus familiaris GN=CSRP1 PE=4 SV=1 - [J9NYN2_CANLF]	7.77	1	1	1	2	193	20.6188	8.57275	1.61807	1.70062	1.65935	1.10374	1.09473	1.09924	0.662451	0.00151377
F1PF31	Uncharacterized protein OS=Canis lupus familiaris GN=TNC PE=4 SV=1 - [F1PF31_CANLF]	1.57	2	3	3	9	2233	243.686	5.0083	1.15262	1.00725	1.07994	0.653337	0.794254	0.723795	0.670219	0.00205653
F1PP21	Uncharacterized protein OS=Canis lupus familiaris GN=ISL1 PE=4 SV=2 - [F1PP21_CANLF]	2.78	1	1	1	2	360	40.26	8.36768	1.20657	1.14051	1.17354	0.699226	0.957573	0.8284	0.705897	0.0073365
F1P6H7	Fibronectin OS=Canis lupus familiaris GN=FN1 PE=4 SV=2 - [F1P6H7_CANLF]	48.15	2	1	81	864	2426	267.073	5.5542	1.72099	1.35801	1.5395	1.0872	1.09908	1.09314	0.710063	0.00839654
E2R2C3	Glucose-6-phosphate isomerase OS=Canis lupus familiaris GN=GPI PE=3 SV=1 - [E2R2C3_CANLF]	11.47	1	5	5	11	558	62.7981	7.92822	0.866209	0.767817	0.817013	0.598589	0.572536	0.585563	0.716711	0.0103568
E2R357	Uncharacterized protein OS=Canis lupus familiaris GN=SUN5 PE=4 SV=1 - [E2R357_CANLF]	1.92	1	1	1	2	365	41.66	8.73389	0.64825	0.594356	0.621303	0.452506	0.438657	0.445582	0.717173	0.0105063
P02677	Fibrinogen beta chain (Fragment) OS=Canis lupus familiaris GN=FGB PE=1 SV=2 - [FIBB_CANLF]	35.48	1	1	1	19	31	3.72878	4.99561	0.816976	1.13539	0.976184	0.606807	0.822605	0.714706	0.732143	0.0164369
F1PH83	Uncharacterized protein OS=Canis lupus familiaris GN=COG7 PE=4 SV=2 - [F1PH83_CANLF]	1.46	2	1	1	18	687	77.2246	5.10986	1.22111	1.40482	1.31296	0.932831	0.998574	0.965703	0.735514	0.0180999
J9NVT1	Uncharacterized protein OS=Canis lupus familiaris GN=UBC PE=4 SV=1 - [J9NVT1_CANLF]	23.62	5	2	2	4	381	42.8251	7.57666	1.15655	1.13785	1.1472	0.755889	0.931928	0.843908	0.735624	0.0181563
F1Q432	Uncharacterized protein OS=Canis lupus familiaris GN=TNXB PE=4 SV=2 - [F1Q432_CANLF]	0.46	2	2	2	3	3874	418.736	5.50342	1.34917	1.18586	1.26752	0.878915	0.990334	0.934624	0.737366	0.0190711
E2RH23	Uncharacterized protein OS=Canis lupus familiaris GN=BRPF1 PE=4 SV=1 - [E2RH23_CANLF]	1.07	1	1	1	9	1220	138.089	7.73779	1.26757	1.32638	1.29697	0.898674	1.01974	0.959205	0.739571	0.0202837
E2RB38	Uncharacterized protein OS=Canis lupus familiaris GN=TPM3 PE=3 SV=2 - [E2RB38_CANLF]	4.03	10	1	1	2	248	28.8527	4.75439	1.39698	1.4085	1.40274	1.12053	0.955605	1.03807	0.740028	0.0205426
J9NWJ5	Thioredoxin OS=Canis lupus familiaris GN=TXN PE=3 SV=1 - [J9NWJ5_CANLF]	23.76	2	2	2	3	101	11.3796	5.21143	1.26668	0.936147	1.10141	0.872823	0.78294	0.827882	0.751655	0.0281047
J9NU05	Uncharacterized protein OS=Canis lupus familiaris GN=LDHB PE=3 SV=1 - [J9NU05_CANLF]	11.48	7	2	4	7	331	36.2048	6.17627	0.909527	0.681484	0.795505	0.529504	0.669781	0.599643	0.753788	0.0297111
J9PB81	Uncharacterized protein OS=Canis lupus familiaris GN=CTSG PE=3 SV=1 - [J9PB81_CANLF]	4.86	1	1	1	2	247	27.2892	11.7808	1.58057	1.52043	1.5505	1.1769	1.1709	1.1739	0.75711	0.0323595
E2RKW4	Uncharacterized protein OS=Canis lupus familiaris GN=CRISP2 PE=3 SV=2 - [E2RKW4_CANLF]	6.01	2	1	1	2	183	20.8112	7.7085	0.997922	0.901768	0.949845	0.723694	0.722099	0.722896	0.761068	0.0357592
J9NVE9	Serum amyloid A protein OS=Canis lupus familiaris GN=LOC102155886 PE=3 SV=1 - [J9NVE9_CANLF]	19.23	1	1	3	11	130	14.5032	9.23193	0.34888	0.503876	0.426378	0.313724	0.339625	0.326674	0.766162	0.0405499
E2QW61	Uncharacterized protein OS=Canis lupus familiaris GN=LBP PE=4 SV=2 - [E2QW61_CANLF]	14.98	1	5	5	18	247	27.1504	8.646	0.734685	0.726291	0.730488	0.560636	0.575017	0.567826	0.777325	0.0528278
E2RIG8	Uncharacterized protein OS=Canis lupus familiaris GN=ARL5B PE=3 SV=2 - [E2RIG8_CANLF]	4.44	1	1	1	3	180	20.4923	6.52197	0.903749	0.835576	0.869663	1.06924	1.19549	1.13237	1.30207	0.058964
F6Y5M8	Uncharacterized protein OS=Canis lupus familiaris GN=LOC100856725 PE=4 SV=1 - [F6Y5M8_CANLF]	4.09	1	1	1	2	171	19.0208	6.52197	0.445658	0.462032	0.453845	0.563026	0.617672	0.590349	1.30077	0.0599262
J9PB25	Uncharacterized protein OS=Canis lupus familiaris GN=CCDC126 PE=4 SV=1 - [J9PB25_CANLF]	8.57	1	1	1	4	140	15.5974	9.87646	1.30736	1.54323	1.4253	1.22999	1.00345	1.11672	0.783501	0.0607696
P18649	Apolipoprotein E OS=Canis lupus familiaris GN=APOE PE=1 SV=2 - [APOE_CANLF]	65.25	1	2	23	255	305	35.3321	5.23682	0.977291	0.782716	0.880004	1.36795	0.908572	1.13826	1.29347	0.0655793
J9P6T6	Uncharacterized protein OS=Canis lupus familiaris GN=MEIG1 PE=4 SV=1 - [J9P6T6_CANLF]	11.36	1	1	1	3	88	10.8054	9.24658	1.15175	1.17776	1.16476	1.41458	1.59326	1.50392	1.29119	0.0674442
J9NRR0	Uncharacterized protein OS=Canis lupus familiaris GN=CREG1 PE=4 SV=1 - [J9NRR0_CANLF]	9.68	2	1	1	2	217	23.5734	7.54736	1.05807	0.964765	1.01142	1.07929	1.53107	1.30518	1.29044	0.0680638
F1PS41	Uncharacterized protein OS=Canis lupus familiaris GN=IPO9 PE=4 SV=2 - [F1PS41_CANLF]	1.61	1	1	1	2	991	111.135	4.85596	1.38894	1.29119	1.34007	1.21169	0.907595	1.05964	0.790738	0.0712127
F1PSJ5	Uncharacterized protein OS=Canis lupus familiaris PE=4 SV=2 - [F1PSJ5_CANLF]	73.96	1	2	4	292	96	10.4701	8.47021	1.08543	1.20663	1.14603	0.940044	0.872896	0.90647	0.790964	0.0715587
E2RMN2	Proteasome subunit alpha type OS=Canis lupus familiaris GN=PSMA6 PE=3 SV=1 - [E2RMN2_CANLF]	29.27	1	6	6	16	246	27.3678	6.75635	0.794303	0.770096	0.782199	1.00853	0.996665	1.0026	1.28177	0.075641
P54714	Triosephosphate isomerase OS=Canis lupus familiaris GN=TPI1 PE=1 SV=3 - [TPIS_CANLF]	32.93	2	6	6	14	249	26.6978	7.32764	0.899194	1.0207	0.959947	0.783753	0.740187	0.76197	0.793762	0.0759603
F1PE38	Uncharacterized protein OS=Canis lupus familiaris GN=CDH13 PE=4 SV=2 - [F1PE38_CANLF]	6.09	1	2	2	4	608	66.4348	4.95752	1.11162	1.17849	1.14506	1.36062	1.57045	1.46553	1.27988	0.0773865
E2R0J4	Uncharacterized protein OS=Canis lupus familiaris GN=ANTXR2 PE=4 SV=2 - [E2R0J4_CANLF]	4.64	1	2	2	3	496	54.1785	8.60205	0.903753	0.987065	0.945409	0.757606	0.750708	0.754157	0.797704	0.0825035
F1PF02	Proteasome subunit beta type OS=Canis lupus familiaris GN=PSMB1 PE=3 SV=2 - [F1PF02_CANLF]	12.7	1	2	2	4	189	20.4531	7.88428	0.889774	0.948256	0.919015	1.26146	1.07337	1.16742	1.27029	0.0867969
E2QX17	Proteasome subunit beta type OS=Canis lupus familiaris GN=PSMB3 PE=3 SV=1 - [E2QX17_CANLF]	20	2	3	3	6	205	22.9635	6.55127	0.951151	0.788128	0.869639	1.31443	0.894957	1.10469	1.27029	0.0868002
E2QW34	Proteasome subunit beta type OS=Canis lupus familiaris GN=PSMB2 PE=3 SV=1 - [E2QW34_CANLF]	5.47	1	1	1	3	201	22.7666	6.68311	0.564277	0.604285	0.584281	0.67015	0.81104	0.740595	1.26753	0.0896853
E2R5H4	Uncharacterized protein OS=Canis lupus familiaris GN=ILK PE=4 SV=1 - [E2R5H4_CANLF]	5.31	1	2	2	3	452	51.3559	8.07471	1.39794	1.40917	1.40356	1.02222	1.23128	1.12675	0.802782	0.0915441
A0A077LQA5	Alpha-tubulin OS=Canis lupus familiaris GN=TUBA1A PE=2 SV=1 - [A0A077LQA5_CANLF]	8.2	9	3	3	5	451	50.1036	5.05908	1.24158	1.14399	1.19279	1.05605	0.863708	0.95988	0.804736	0.0952126
J9NX46	Uncharacterized protein OS=Canis lupus familiaris GN=GLIPR2 PE=3 SV=1 - [J9NX46_CANLF]	16.99	1	2	2	3	153	17.1396	9.51025	1.10619	1.15653	1.13136	0.879406	0.941729	0.910567	0.804844	0.0954175
F6Y4Y7	Uncharacterized protein OS=Canis lupus familiaris GN=TMF1 PE=4 SV=1 - [F6Y4Y7_CANLF]	0.55	1	1	1	2	1095	123.369	5.021	0.549896	1.15208	0.850986	0.684457	0.688223	0.68634	0.806523	0.0986606
F1PCE2	Uncharacterized protein OS=Canis lupus familiaris GN=EXTL2 PE=4 SV=2 - [F1PCE2_CANLF]	8.23	2	2	2	4	316	35.9837	9.27588	0.990786	0.999973	0.995379	1.24438	1.26145	1.25291	1.25873	0.0994649
T2KEN6	Pentaxin OS=Canis lupus familiaris GN=CRP PE=2 SV=1 - [T2KEN6_CANLF]	43.95	2	7	7	50	223	25.3669	6.03662	0.785117	0.685792	0.735455	0.647037	0.543817	0.595427	0.809603	0.104819
F1PCG4	Uncharacterized protein OS=Canis lupus familiaris GN=PRDX2 PE=4 SV=2 - [F1PCG4_CANLF]	33.33	1	5	6	23	198	21.8841	5.42725	0.8086	0.66979	0.739195	0.887356	0.961553	0.924454	1.25062	0.109277
C0LQL0	Protein S100 OS=Canis lupus familiaris GN=S100A8 PE=2 SV=1 - [C0LQL0_CANLF]	20.22	2	2	2	3	89	10.3683	5.45264	0.746347	0.726703	0.736525	1.03374	0.807278	0.920511	1.2498	0.110313
E2RQF8	Uncharacterized protein OS=Canis lupus familiaris GN=ECM1 PE=4 SV=2 - [E2RQF8_CANLF]	21.88	1	7	7	23	352	40.2323	7.79639	0.803389	0.852004	0.827696	1.04576	1.01578	1.03077	1.24535	0.116091
F1PS30	alpha-1,2-Mannosidase OS=Canis lupus familiaris GN=MAN1A1 PE=3 SV=1 - [F1PS30_CANLF]	9.59	2	4	4	7	584	66.0596	6.37939	1.32819	1.22199	1.27509	0.920022	1.16384	1.04193	0.817143	0.121071
F6USM4	Uncharacterized protein OS=Canis lupus familiaris GN=MASP2 PE=3 SV=1 - [F6USM4_CANLF]	7	1	3	3	6	686	74.8844	5.8335	0.954011	1.06615	1.01008	1.27829	1.22419	1.25124	1.23875	0.125137
F1PSX2	Uncharacterized protein OS=Canis lupus familiaris PE=4 SV=2 - [F1PSX2_CANLF]	96.23	3	1	9	1483	106	11.1575	7.86963	1.18711	1.13413	1.16062	0.948533	0.95775	0.953142	0.821238	0.130618
E2RM78	Uncharacterized protein OS=Canis lupus familiaris GN=ISLR PE=4 SV=2 - [E2RM78_CANLF]	3.28	1	1	1	4	488	51.6722	5.2876	1.18026	1.19161	1.18593	0.947915	1.00035	0.974133	0.821408	0.131026
J9P2L7	Uncharacterized protein OS=Canis lupus familiaris PE=4 SV=1 - [J9P2L7_CANLF]	7.86	1	1	1	3	140	14.8362	7.07861	0.807902	1.26082	1.03436	0.764469	0.944372	0.85442	0.826036	0.142472
E2RKI1	Uncharacterized protein OS=Canis lupus familiaris GN=DMKN PE=4 SV=2 - [E2RKI1_CANLF]	7.71	4	2	2	4	454	43.3521	6.94678	0.936771	1.14903	1.0429	0.898751	1.6567	1.27773	1.22517	0.145656
L7N0J5	Uncharacterized protein OS=Canis lupus familiaris PE=4 SV=1 - [L7N0J5_CANLF]	14.71	1	2	2	8	170	17.903	8.48486	1.05064	1.20525	1.12795	0.866115	1.00255	0.934334	0.82835	0.148449
F1PL59	Scavenger receptor cysteine-rich type 1 protein M130 OS=Canis lupus familiaris GN=CD163 PE=4 SV=2 - [F1PL59_CANLF]	2.43	3	2	2	3	1110	120.023	5.73193	1.1845	1.14407	1.16429	1.22338	1.62479	1.42408	1.22314	0.148948
J9NWQ5	Uncharacterized protein OS=Canis lupus familiaris PE=4 SV=1 - [J9NWQ5_CANLF]	18.06	5	2	2	4	144	16.2065	4.28467	1.25528	1.4574	1.35634	1.11307	1.13792	1.1255	0.829804	0.152294
L7N0J8	Uncharacterized protein OS=Canis lupus familiaris PE=4 SV=1 - [L7N0J8_CANLF]	1.62	1	1	1	4	678	76.0069	9.61279	1.11644	0.679166	0.897806	0.845481	0.647028	0.746254	0.831198	0.156042
F1PQN5	Uncharacterized protein OS=Canis lupus familiaris GN=CFL1 PE=3 SV=2 - [F1PQN5_CANLF]	30.72	5	3	3	10	166	18.4877	8.08936	1.22411	1.30923	1.26667	1.06898	1.03874	1.05386	0.831991	0.158202
J9NWJ0	Peptidoglycan-recognition protein OS=Canis lupus familiaris GN=PGLYRP1 PE=3 SV=1 - [J9NWJ0_CANLF]	12.24	1	2	2	4	196	21.6569	8.20654	0.9076	0.869006	0.888303	0.951709	1.21058	1.08114	1.21709	0.159143
E2R2K4	Uncharacterized protein OS=Canis lupus familiaris GN=RAP1B PE=4 SV=1 - [E2R2K4_CANLF]	6.52	2	1	1	2	184	20.8256	5.78271	1.15899	1.11483	1.13691	1.35849	1.40561	1.38205	1.21561	0.161713
Q38J75	Coagulation factor VII OS=Canis lupus familiaris PE=2 SV=1 - [Q38J75_CANLF]	18.83	3	8	8	14	446	49.684	5.61768	0.866708	0.870253	0.868481	0.862466	1.24693	1.0547	1.21442	0.163821
E2RNJ1	Uncharacterized protein OS=Canis lupus familiaris GN=LAMP2 PE=4 SV=2 - [E2RNJ1_CANLF]	5.11	2	2	2	8	411	45.1065	6.66846	0.975777	0.899607	0.937692	1.11411	1.15748	1.13579	1.21126	0.169502
J9P4Z4	Dipeptidase OS=Canis lupus familiaris GN=DPEP3 PE=3 SV=1 - [J9P4Z4_CANLF]	5.47	1	2	2	4	512	56.6114	9.31982	0.954919	1.00511	0.980016	0.751657	0.889761	0.820709	0.837444	0.173622
J9NYG8	Uncharacterized protein OS=Canis lupus familiaris GN=C4BPB PE=4 SV=1 - [J9NYG8_CANLF]	27.06	2	9	9	58	255	28.5237	5.18604	0.999978	1.01387	1.00692	0.825407	0.864781	0.845094	0.839284	0.179047
P19006	Haptoglobin OS=Canis lupus familiaris GN=HP PE=1 SV=2 - [HPT_CANLF]	80.24	3	30	30	2258	329	36.4342	6.0874	1.0496	1.04548	1.04754	0.886232	0.872387	0.879309	0.839402	0.179397
J9PAA1	Uncharacterized protein OS=Canis lupus familiaris PE=3 SV=1 - [J9PAA1_CANLF]	21.81	12	4	4	14	243	27.3726	4.83057	1.21486	1.20817	1.21152	0.85509	1.17978	1.01744	0.839802	0.180594
E2R7G9	Uncharacterized protein OS=Canis lupus familiaris PE=4 SV=2 - [E2R7G9_CANLF]	58.09	1	5	5	80	136	14.63	5.38916	0.964052	0.962039	0.963045	1.11154	1.20212	1.15683	1.20122	0.188662
E2R302	Uncharacterized protein OS=Canis lupus familiaris GN=ERAP1 PE=4 SV=1 - [E2R302_CANLF]	2.76	1	3	3	3	942	107.196	5.68115	1.22096	1.17836	1.19966	0.943453	1.07815	1.0108	0.842573	0.189023
E2R913	Uncharacterized protein OS=Canis lupus familiaris GN=CARHSP1 PE=4 SV=1 - [E2R913_CANLF]	10.39	1	1	1	3	154	16.6054	8.20654	0.858198	1.03499	0.946593	0.882883	0.712543	0.797713	0.84272	0.189476
F1PN98	Uncharacterized protein OS=Canis lupus familiaris GN=F5 PE=3 SV=2 - [F1PN98_CANLF]	16.38	2	31	31	99	2222	251.715	5.77002	1.13684	1.12273	1.12979	0.944479	0.962156	0.953318	0.843804	0.192849
E2RRU2	Uncharacterized protein OS=Canis lupus familiaris GN=SMPDL3A PE=4 SV=2 - [E2RRU2_CANLF]	18.91	2	5	5	14	349	40.2722	6.65381	1.02362	1.05638	1.04	0.908989	0.852815	0.880902	0.847018	0.203082
J9P8M2	Fibronectin OS=Canis lupus familiaris GN=FN1 PE=4 SV=1 - [J9P8M2_CANLF]	52.48	1	3	83	895	2256	248.986	6.13818	1.43402	1.48415	1.45908	1.27488	1.19707	1.23597	0.847089	0.203314
F1Q0C1	Uncharacterized protein OS=Canis lupus familiaris GN=DOPEY1 PE=4 SV=2 - [F1Q0C1_CANLF]	0.41	2	1	1	3	2455	275.66	6.30322	0.73667	0.600845	0.668757	0.835724	0.758045	0.796884	1.19159	0.208669
L7N0I0	Uncharacterized protein OS=Canis lupus familiaris PE=4 SV=1 - [L7N0I0_CANLF]	63.77	1	3	5	130	69	7.88686	9.43701	0.932521	0.930924	0.931722	0.768681	0.81302	0.79085	0.848805	0.208922
E2QSF4	Uncharacterized protein OS=Canis lupus familiaris GN=TUBB PE=3 SV=1 - [E2QSF4_CANLF]	7.21	6	1	2	4	444	49.639	4.89404	1.29803	1.20326	1.25064	1.0062	1.11928	1.06274	0.849752	0.212062
F1PKN5	Uncharacterized protein OS=Canis lupus familiaris PE=4 SV=2 - [F1PKN5_CANLF]	10.96	1	1	1	22	146	15.8107	5.35107	0.923115	0.957885	0.9405	1.02838	1.20809	1.11823	1.18898	0.214379
J9P0R6	Uncharacterized protein OS=Canis lupus familiaris GN=MPO PE=4 SV=1 - [J9P0R6_CANLF]	5.48	2	3	3	5	657	74.027	9.68604	0.96796	1.07576	1.02186	1.17775	1.24157	1.20966	1.18378	0.226115
F1PH61	Uncharacterized protein OS=Canis lupus familiaris PE=4 SV=2 - [F1PH61_CANLF]	33.09	1	3	3	42	136	14.5432	5.75732	0.872713	0.873202	0.872958	0.98116	1.08504	1.0331	1.18345	0.226887
E2RLF1	Uncharacterized protein OS=Canis lupus familiaris GN=PSAP PE=4 SV=1 - [E2RLF1_CANLF]	2.86	1	1	1	5	524	57.9448	5.05908	0.825076	0.75999	0.792533	0.951329	0.921506	0.936418	1.18155	0.231306
J9P5V6	Uncharacterized protein OS=Canis lupus familiaris GN=TLN1 PE=4 SV=1 - [J9P5V6_CANLF]	6.23	2	9	9	17	2425	257.416	6.56592	1.1593	1.47972	1.31951	1.16442	1.09389	1.12915	0.855739	0.232609
F6X870	Uncharacterized protein OS=Canis lupus familiaris GN=PAM PE=4 SV=1 - [F6X870_CANLF]	4.09	2	2	2	3	807	89.4679	6.21436	1.31355	1.38042	1.34699	1.2152	1.09072	1.15296	0.855954	0.23337
F1PEN8	Carboxylic ester hydrolase OS=Canis lupus familiaris GN=BCHE PE=3 SV=1 - [F1PEN8_CANLF]	9.14	1	4	4	7	602	68.4747	7.63525	1.24117	0.875724	1.05845	1.22292	1.27613	1.24953	1.18053	0.233713
F5XVB0	von Willebrand factor OS=Canis lupus familiaris GN=VWF PE=2 SV=1 - [F5XVB0_CANLF]	2.67	3	5	5	15	2813	309.482	5.5415	0.702006	0.88269	0.792348	0.945895	0.920787	0.933341	1.17794	0.2399
J9P5C8	Uncharacterized protein OS=Canis lupus familiaris PE=4 SV=1 - [J9P5C8_CANLF]	55.56	1	3	5	135	117	12.8654	7.82568	0.873583	0.882475	0.878029	0.957155	1.11093	1.03404	1.17769	0.240519
F6V8B5	Uncharacterized protein OS=Canis lupus familiaris PE=4 SV=1 - [F6V8B5_CANLF]	33.82	2	3	3	28	136	14.529	7.97217	0.997272	1.10229	1.04978	1.14251	1.32993	1.23622	1.1776	0.240732
F1PBI6	Uncharacterized protein OS=Canis lupus familiaris GN=THBS1 PE=4 SV=2 - [F1PBI6_CANLF]	17.18	6	18	18	55	1170	129.53	4.98291	1.186	1.20715	1.19658	0.997388	1.05667	1.02703	0.858306	0.241794
J9PBN6	Uncharacterized protein OS=Canis lupus familiaris GN=LOC611458 PE=4 SV=1 - [J9PBN6_CANLF]	60.76	1	4	79	1490	1478	165.846	6.62451	1.17563	1.38766	1.28164	1.03987	1.16529	1.10258	0.860288	0.249038
E2RES2	Uncharacterized protein OS=Canis lupus familiaris GN=SERPINC1 PE=3 SV=2 - [E2RES2_CANLF]	60.86	1	31	31	675	465	52.4327	6.69775	1.01423	1.02814	1.02118	0.874301	0.883466	0.878883	0.860652	0.25038
Q3HTU6	Interleukin 18 binding protein OS=Canis lupus familiaris PE=2 SV=1 - [Q3HTU6_CANLF]	10.26	2	1	1	2	117	12.9935	6.91748	0.854018	0.795567	0.824792	1.06233	0.872221	0.967276	1.17275	0.252711
E2R7A3	Uncharacterized protein OS=Canis lupus familiaris GN=CFI PE=3 SV=2 - [E2R7A3_CANLF]	36.11	1	3	18	116	565	62.9423	7.29834	0.769065	0.883716	0.82639	0.906847	1.03123	0.969037	1.17261	0.253054
Q8MJD1	Neutrophil elastase OS=Canis lupus familiaris GN=ELANE PE=2 SV=1 - [Q8MJD1_CANLF]	4.96	1	1	1	4	282	29.9016	10.6528	1.08113	0.963163	1.02215	1.16642	1.22681	1.19661	1.17068	0.257957
F1PL50	Uncharacterized protein OS=Canis lupus familiaris PE=4 SV=2 - [F1PL50_CANLF]	24.08	1	2	2	25	191	20.2628	6.06201	1.26222	1.15212	1.20717	1.08186	1.01265	1.04726	0.867533	0.276647
P01785	Ig heavy chain V region MOO OS=Canis lupus familiaris PE=1 SV=1 - [HV02_CANLF]	23.08	1	2	2	33	117	12.6952	4.71631	1.21781	1.09817	1.15799	1.03028	0.979444	1.00486	0.867763	0.27755
E2QYB2	Uncharacterized protein OS=Canis lupus familiaris PE=4 SV=2 - [E2QYB2_CANLF]	45.95	8	1	5	112	111	12.0179	5.99854	0.694794	0.597506	0.64615	0.782398	0.719254	0.750826	1.162	0.280933
E2R5E9	Uncharacterized protein OS=Canis lupus familiaris PE=4 SV=2 - [E2R5E9_CANLF]	21.28	1	1	1	8	47	5.56684	8.48486	0.925211	0.991633	0.958422	0.885079	0.782158	0.833618	0.869782	0.285574
F1PFM6	Uncharacterized protein OS=Canis lupus familiaris GN=COL6A1 PE=4 SV=2 - [F1PFM6_CANLF]	1.27	1	1	1	4	1026	108.51	5.5415	0.901632	1.12621	1.01392	0.886478	0.881831	0.884154	0.872013	0.294601
F1PMS8	Uncharacterized protein OS=Canis lupus familiaris GN=NCAM1 PE=4 SV=2 - [F1PMS8_CANLF]	14.1	6	7	7	7	709	78.3852	4.94482	1.31727	0.91563	1.11645	1.31818	1.26364	1.29091	1.15626	0.29695
E2RFB7	Amine oxidase OS=Canis lupus familiaris GN=AOC3 PE=3 SV=2 - [E2RFB7_CANLF]	8.78	4	7	7	30	763	84.1922	6.3667	1.16966	1.10502	1.13734	0.966551	1.02205	0.9943	0.87423	0.303732
E2RA67	C-C motif chemokine OS=Canis lupus familiaris GN=CCL14 PE=3 SV=1 - [E2RA67_CANLF]	21.88	1	2	2	21	96	11.0075	8.104	1.03408	1.05396	1.04402	0.925565	0.89988	0.912723	0.874238	0.303767
Q8HY81	Cathepsin S OS=Canis lupus familiaris GN=CTSS PE=2 SV=1 - [CATS_CANLF]	3.93	2	1	1	4	331	37.2041	8.1333	1.01861	1.06884	1.04373	0.850559	0.976688	0.913624	0.875347	0.308395
L7N0K1	Uncharacterized protein OS=Canis lupus familiaris PE=4 SV=1 - [L7N0K1_CANLF]	9.2	1	1	1	9	174	18.1347	8.06006	1.09165	1.07096	1.0813	1.21576	1.27112	1.24344	1.14994	0.315386
F1P8V6	Myoglobin OS=Canis lupus familiaris GN=MB PE=3 SV=1 - [F1P8V6_CANLF]	18.83	2	2	2	10	154	17.3261	7.78174	0.495684	0.687692	0.591688	0.429829	0.608531	0.51918	0.877456	0.317311
E2R8Z5	Uncharacterized protein OS=Canis lupus familiaris GN=KRT5 PE=3 SV=2 - [E2R8Z5_CANLF]	11.74	19	2	7	28	596	62.6911	7.72314	1.11893	1.04275	1.08084	1.36796	1.11646	1.24221	1.1493	0.317311
F1P6H6	Uncharacterized protein OS=Canis lupus familiaris GN=CCDC96 PE=4 SV=2 - [F1P6H6_CANLF]	1.72	1	1	1	3	348	41.0333	7.2251	1.11653	0.955347	1.03594	0.929258	0.890646	0.909952	0.878384	0.321278
J9P455	Uncharacterized protein OS=Canis lupus familiaris PE=4 SV=1 - [J9P455_CANLF]	38.1	5	1	4	88	126	13.5708	8.55811	0.992728	0.871493	0.93211	1.15796	0.979784	1.06887	1.14672	0.325117
E2RE76	Apolipoprotein A-IV OS=Canis lupus familiaris GN=APOA4 PE=3 SV=2 - [APOA4_CANLF]	61.9	1	27	27	437	378	42.5099	6.0874	1.01919	0.996977	1.00808	0.90125	0.874574	0.887912	0.880794	0.331718
J9NY02	Uncharacterized protein OS=Canis lupus familiaris PE=4 SV=1 - [J9NY02_CANLF]	61.43	1	4	7	144	140	15.3888	9.45166	1.03009	1.07446	1.05227	0.915027	0.939921	0.927474	0.8814	0.334373
F1P865	Uncharacterized protein OS=Canis lupus familiaris GN=SFXN4 PE=4 SV=2 - [F1P865_CANLF]	6.11	1	1	1	2	311	35.5138	9.39307	0.407826	1.35218	0.880004	0.85627	0.695282	0.775776	0.88156	0.335073
J9P5Z0	Myosin-1 OS=Canis lupus familiaris GN=MYH1 PE=4 SV=1 - [J9P5Z0_CANLF]	0.78	9	1	1	3	773	89.9375	5.52881	0.737265	0.972825	0.855045	0.759175	0.748682	0.753929	0.881742	0.335873
E2QXJ3	Uncharacterized protein OS=Canis lupus familiaris PE=4 SV=1 - [E2QXJ3_CANLF]	25.86	1	2	2	5	116	12.6472	4.95752	0.983463	1.11264	1.04805	1.12022	1.27599	1.1981	1.14317	0.336075
Q6EIZ1	Keratin, type II cytoskeletal 2 epidermal OS=Canis lupus familiaris GN=KRT2 PE=2 SV=1 - [K22E_CANLF]	7.58	11	3	5	16	633	64.5264	7.73779	1.2069	1.03565	1.12127	1.12057	0.863006	0.991787	0.884519	0.34822
E2QXH0	Uncharacterized protein OS=Canis lupus familiaris GN=PLA1A PE=3 SV=2 - [E2QXH0_CANLF]	4.82	1	1	1	3	456	50.1087	7.73779	1.16902	1.44736	1.30819	1.32976	1.64594	1.48785	1.13733	0.354712
E2R0T6	Uncharacterized protein OS=Canis lupus familiaris GN=HSPA8 PE=3 SV=1 - [E2R0T6_CANLF]	8.82	7	2	4	5	646	70.8542	5.51611	1.28381	1.1225	1.20316	1.08141	1.05074	1.06607	0.886064	0.355195
F1PF03	Receptor protein-tyrosine kinase OS=Canis lupus familiaris GN=EGFR PE=3 SV=2 - [F1PF03_CANLF]	1.53	1	1	1	2	1180	131.445	6.91748	1.12969	1.23185	1.18077	1.08965	1.00378	1.04672	0.886467	0.357026
F1PC59	Uncharacterized protein OS=Canis lupus familiaris GN=PRDX6 PE=4 SV=1 - [F1PC59_CANLF]	10.86	1	2	2	3	221	24.6559	6.01123	0.661688	1.13484	0.898265	0.668405	0.926311	0.797358	0.887665	0.362498
J9PAQ5	Protein S100 OS=Canis lupus familiaris GN=S100A12 PE=3 SV=1 - [J9PAQ5_CANLF]	27.17	2	2	2	4	92	10.4984	6.06201	0.720614	0.57727	0.648942	0.87719	0.593435	0.735313	1.13309	0.368703
F1PIF2	Uncharacterized protein OS=Canis lupus familiaris GN=CTSZ PE=3 SV=2 - [F1PIF2_CANLF]	3.83	1	1	1	2	261	29.2696	6.26514	0.830488	0.880355	0.855422	0.754435	0.773692	0.764064	0.893201	0.388375
E2RI13	Uncharacterized protein OS=Canis lupus familiaris GN=GPBP1 PE=4 SV=2 - [E2RI13_CANLF]	3.96	2	1	1	2	480	54.1474	6.90283	1.4907	1.16281	1.32675	1.3554	1.01721	1.18631	0.894145	0.392878
H9GWI3	Uncharacterized protein OS=Canis lupus familiaris GN=AHNAK2 PE=4 SV=2 - [H9GWI3_CANLF]	10.46	2	3	3	5	1415	147.607	6.27783	1.09514	0.959369	1.02725	1.21029	1.10176	1.15603	1.12536	0.395254
L7N0K2	Uncharacterized protein OS=Canis lupus familiaris PE=4 SV=1 - [L7N0K2_CANLF]	57.85	1	3	5	148	121	13.4906	9.05615	1.20863	1.18858	1.1986	1.10422	1.04153	1.07287	0.895101	0.397472
P81546	Metalloproteinase inhibitor 1 OS=Canis lupus familiaris GN=TIMP1 PE=1 SV=2 - [TIMP1_CANLF]	8.7	3	2	2	7	207	22.8373	8.44092	0.911737	1.12729	1.01951	0.869228	0.95752	0.913374	0.895891	0.401285
F6Y290	Leukotriene A(4) hydrolase OS=Canis lupus familiaris GN=LTA4H PE=3 SV=1 - [F6Y290_CANLF]	8.13	1	5	5	7	701	78.662	7.03467	1.0788	1.10484	1.09182	1.00058	0.956575	0.978576	0.896281	0.40317
F1PYF5	Matrix metalloproteinase-9 OS=Canis lupus familiaris GN=MMP9 PE=3 SV=2 - [F1PYF5_CANLF]	13.49	6	8	8	15	704	78.1621	5.63037	0.871104	0.804875	0.837989	0.917459	0.963992	0.940725	1.1226	0.40504
F1Q462	Superoxide dismutase [Cu-Zn] OS=Canis lupus familiaris GN=SOD1 PE=3 SV=2 - [F1Q462_CANLF]	14.67	2	2	2	3	150	15.5527	6.52197	0.971118	0.919142	0.94513	0.877759	0.819418	0.848588	0.897854	0.410836
J9NTU0	Uncharacterized protein OS=Canis lupus familiaris PE=3 SV=1 - [J9NTU0_CANLF]	3.43	6	1	1	2	321	34.6293	7.81104	0.96462	0.995441	0.98003	1.10401	1.09301	1.09851	1.12089	0.411182
P81709	Lysozyme C, spleen isozyme OS=Canis lupus familiaris PE=1 SV=1 - [LYSC2_CANLF]	18.46	2	2	2	4	130	14.5692	8.80713	0.826029	0.795513	0.810771	0.84823	0.968239	0.908235	1.12021	0.413646
E2RN74	Uncharacterized protein OS=Canis lupus familiaris GN=CPB2 PE=4 SV=1 - [E2RN74_CANLF]	14.66	1	6	6	19	423	49.0527	7.78174	0.915786	1.15654	1.03616	0.877128	0.985376	0.931252	0.898753	0.415251
F1PD34	Uncharacterized protein OS=Canis lupus familiaris GN=SPP2 PE=4 SV=2 - [F1PD34_CANLF]	11.06	2	2	2	10	199	22.7462	7.18115	0.960848	0.879227	0.920037	1.06074	0.997428	1.02908	1.11853	0.419796
F1PCE5	Uncharacterized protein OS=Canis lupus familiaris GN=SERPINA1 PE=3 SV=2 - [F1PCE5_CANLF]	39.62	3	3	19	742	419	46.733	6.17627	1.24891	1.14644	1.19767	1.10884	1.0466	1.07772	0.899843	0.420635
E2QW82	Uncharacterized protein OS=Canis lupus familiaris GN=MMP19 PE=3 SV=2 - [E2QW82_CANLF]	17.57	1	8	8	16	569	64.0522	7.1958	0.99604	1.02416	1.0101	1.05984	1.19848	1.12916	1.11787	0.422218
E7BUP9	Proteasome subunit beta type OS=Canis lupus familiaris GN=PSMB7 PE=2 SV=1 - [E7BUP9_CANLF]	3.61	3	1	1	2	277	29.9932	7.6792	1.03477	0.942145	0.988457	0.867607	0.917713	0.89266	0.903084	0.436843
E2RN10	Beta-2-microglobulin OS=Canis lupus familiaris GN=B2M PE=2 SV=2 - [E2RN10_CANLF]	16.8	1	2	2	17	125	14.2543	6.3667	1.01663	0.87544	0.946035	1.12123	0.983354	1.05229	1.11232	0.44299
E2RJY0	Uncharacterized protein OS=Canis lupus familiaris GN=KCTD12 PE=4 SV=1 - [E2RJY0_CANLF]	8.26	1	2	2	4	327	35.8438	5.64307	0.999291	0.694599	0.846945	0.773287	0.758862	0.766075	0.904515	0.444092
F1PQU0	Uncharacterized protein OS=Canis lupus familiaris PE=4 SV=2 - [F1PQU0_CANLF]	32.14	1	2	3	53	140	14.8592	7.79639	1.12576	1.14971	1.13773	1.28958	1.23965	1.26462	1.11152	0.446017
P12278	Apolipoprotein C-II OS=Canis lupus familiaris GN=APOC2 PE=1 SV=1 - [APOC2_CANLF]	41.58	2	6	6	92	101	11.2196	4.88135	0.848836	0.867527	0.858181	0.957674	0.9498	0.953737	1.11135	0.44669
J9NYC0	Uncharacterized protein OS=Canis lupus familiaris GN=MFAP4 PE=4 SV=1 - [J9NYC0_CANLF]	9.84	1	2	2	11	254	28.3758	5.89697	1.07398	0.954842	1.01441	0.945151	0.892188	0.918669	0.905618	0.449718
J9P849	Proteasome subunit alpha type OS=Canis lupus familiaris GN=PSMA3 PE=3 SV=1 - [J9P849_CANLF]	21.14	2	5	5	12	246	27.3688	7.37158	0.965814	0.894427	0.93012	1.09183	0.972439	1.03213	1.10968	0.453105
E2QUU8	Uncharacterized protein OS=Canis lupus familiaris PE=4 SV=2 - [E2QUU8_CANLF]	13.79	1	1	2	46	145	15.6239	8.88037	1.45978	1.3383	1.39904	1.25418	1.28278	1.26848	0.90668	0.455166
F1PEN6	Transferrin receptor protein 1 OS=Canis lupus familiaris GN=TFRC PE=2 SV=1 - [F1PEN6_CANLF]	29.35	3	22	22	142	770	86.5324	6.30322	0.898209	0.90078	0.899494	0.980705	1.01414	0.997422	1.10887	0.456235
F1PUM6	Uncharacterized protein OS=Canis lupus familiaris GN=VTN PE=4 SV=1 - [F1PUM6_CANLF]	23.4	2	10	10	90	470	53.672	5.14795	1.0762	1.04965	1.06293	1.20191	1.15234	1.17712	1.10744	0.461815
E2RA70	C-C motif chemokine OS=Canis lupus familiaris GN=CCL16 PE=3 SV=2 - [E2RA70_CANLF]	23.14	2	2	2	2	121	13.9026	10.0962	1.38701	1.1217	1.25436	1.13996	1.13845	1.1392	0.908198	0.463009
E2RS79	Uncharacterized protein OS=Canis lupus familiaris GN=C2 PE=3 SV=2 - [E2RS79_CANLF]	43.46	1	7	31	165	780	86.2334	7.97217	0.98529	1.02676	1.00603	0.898706	0.931733	0.91522	0.909737	0.471019
F1PYL6	Uncharacterized protein OS=Canis lupus familiaris GN=FCMR PE=4 SV=2 - [F1PYL6_CANLF]	2.68	1	1	1	2	410	45.4214	9.26123	1.20515	0.937543	1.07134	0.984846	0.965205	0.975026	0.910095	0.472895
F1P8Z5	Uncharacterized protein OS=Canis lupus familiaris GN=APOB PE=4 SV=1 - [F1P8Z5_CANLF]	48.86	5	186	186	1133	4425	501.222	6.88818	1.02191	1.02956	1.02573	0.937546	0.929542	0.933544	0.910123	0.473039
Q6JDI3	Plasminogen (Fragment) OS=Canis lupus familiaris GN=PLG PE=4 SV=1 - [Q6JDI3_CANLF]	20.37	1	1	1	3	54	5.86178	5.10986	1.06727	0.911593	0.989432	0.905438	0.896947	0.901192	0.910817	0.476684
F1P832	Alpha-1,4 glucan phosphorylase OS=Canis lupus familiaris GN=PYGM PE=3 SV=2 - [F1P832_CANLF]	2.14	1	1	1	2	842	97.1468	7.10791	0.891853	0.914712	0.903282	1.01062	0.981016	0.995818	1.10244	0.481627
F6XZU1	Uncharacterized protein OS=Canis lupus familiaris GN=PGLYRP2 PE=4 SV=1 - [F6XZU1_CANLF]	31.67	2	10	10	20	562	61.0583	7.18115	1.13265	1.06862	1.10063	1.19879	1.22491	1.21185	1.10105	0.487267
L7N0L4	Uncharacterized protein OS=Canis lupus familiaris PE=4 SV=1 - [L7N0L4_CANLF]	35.82	1	2	3	199	134	14.7043	8.26514	0.906704	0.867431	0.887068	0.878232	1.0748	0.976515	1.10083	0.48813
F1Q184	Uncharacterized protein OS=Canis lupus familiaris PE=4 SV=2 - [F1Q184_CANLF]	24.26	1	5	5	101	202	21.6856	6.34131	0.932444	0.967711	0.950077	0.841878	0.89425	0.868064	0.913677	0.491817
F1PUB5	Uncharacterized protein OS=Canis lupus familiaris GN=PSMA7 PE=4 SV=2 - [F1PUB5_CANLF]	27.4	3	3	5	6	219	24.5661	8.70459	1.04832	1.07865	1.06349	0.972438	0.972082	0.97226	0.91422	0.494711
J9P732	Uncharacterized protein OS=Canis lupus familiaris GN=S100A9 PE=3 SV=1 - [J9P732_CANLF]	8.85	1	2	2	3	192	21.4315	6.45557	0.980836	0.920314	0.950575	1.33506	0.753947	1.0445	1.09881	0.496373
F1PDJ5	Apolipoprotein A-I OS=Canis lupus familiaris GN=APOA1 PE=3 SV=1 - [F1PDJ5_CANLF]	85.71	14	41	41	5742	266	30.1628	5.38916	1.06039	1.06416	1.06227	0.966967	0.978988	0.972978	0.915938	0.503928
E2R4H4	Uncharacterized protein OS=Canis lupus familiaris GN=PSMA5 PE=4 SV=2 - [E2R4H4_CANLF]	26.78	1	3	3	12	183	20.0219	4.729	1.33806	1.33858	1.33832	1.22222	1.2298	1.22601	0.916083	0.504707
F6Y6T8	Uncharacterized protein OS=Canis lupus familiaris GN=PIGR PE=4 SV=1 - [F6Y6T8_CANLF]	29.13	4	15	15	54	762	83.142	5.51611	1.14279	1.09924	1.12101	1.01612	1.03941	1.02777	0.916817	0.508668
F1PV45	Uncharacterized protein OS=Canis lupus familiaris GN=TTN PE=4 SV=2 - [F1PV45_CANLF]	0.03	1	1	1	2	35180	3904.61	6.354	1.09401	0.80772	0.950865	1.16804	0.909806	1.03892	1.09261	0.52225
F1PZR2	Uncharacterized protein OS=Canis lupus familiaris GN=WRN PE=4 SV=2 - [F1PZR2_CANLF]	0.52	1	1	1	2	1336	152.094	6.59521	0.688987	0.629243	0.659115	0.752622	0.686182	0.719402	1.09147	0.527097
D2K841	C-X-C motif chemokine OS=Canis lupus familiaris PE=2 SV=1 - [D2K841_CANLF]	27.12	2	2	2	12	118	12.9219	9.18799	0.949969	0.96785	0.958909	0.997851	1.09423	1.04604	1.09086	0.529665
L7N0F1	Uncharacterized protein OS=Canis lupus familiaris GN=LOC100687054 PE=4 SV=1 - [L7N0F1_CANLF]	35.85	1	1	7	853	212	22.2162	8.73389	1.11755	1.19885	1.1582	1.07195	1.06117	1.06656	0.920878	0.530816
F1PYM4	Uncharacterized protein OS=Canis lupus familiaris GN=IGFALS PE=4 SV=2 - [F1PYM4_CANLF]	33.18	1	17	17	80	654	70.279	7.54736	1.01837	1.07682	1.04759	1.16343	1.12015	1.14179	1.08992	0.533724
J9NT12	Uncharacterized protein OS=Canis lupus familiaris GN=FGL1 PE=4 SV=1 - [J9NT12_CANLF]	10.03	1	3	3	3	309	35.9454	5.97314	0.787744	0.843017	0.815381	0.948056	0.829247	0.888651	1.08986	0.533966
F1PGD4	Uncharacterized protein OS=Canis lupus familiaris GN=NELL2 PE=4 SV=2 - [F1PGD4_CANLF]	4.78	1	3	3	8	816	91.1594	5.77002	1.14266	1.02221	1.08243	0.968898	1.03042	0.99966	0.92353	0.545484
F1PAA4	Cadherin-1 OS=Canis lupus familiaris GN=CDH1 PE=4 SV=2 - [F1PAA4_CANLF]	4.35	2	2	2	5	827	91.4279	4.729	1.06895	0.995601	1.03228	1.10215	1.1413	1.12172	1.08665	0.54786
Q6QNF3	Platelet-derived growth factor receptor beta OS=Canis lupus familiaris GN=PDGFRB PE=2 SV=1 - [PGFRB_CANLF]	5.17	2	4	4	8	1103	122.944	5.10986	1.00793	1.16613	1.08703	1.21135	1.14986	1.1806	1.08608	0.550335
F1PYR5	Uncharacterized protein OS=Canis lupus familiaris PE=4 SV=2 - [F1PYR5_CANLF]	39.22	1	5	6	126	232	24.9363	6.87354	1.05165	1.08627	1.06896	0.975801	1.00171	0.988756	0.924973	0.553535
E2QX19	Uncharacterized protein OS=Canis lupus familiaris GN=MST1 PE=3 SV=2 - [E2QX19_CANLF]	6.47	2	4	4	7	711	80.1645	7.47412	1.08302	0.913106	0.99806	1.02347	1.14212	1.08279	1.0849	0.555537
F1PY40	Uncharacterized protein OS=Canis lupus familiaris GN=CFI PE=4 SV=2 - [F1PY40_CANLF]	29.9	1	2	16	101	612	68.5111	7.72314	1.11644	1.18986	1.15315	1.03527	1.099	1.06714	0.92541	0.555978
E2RK02	Uncharacterized protein OS=Canis lupus familiaris GN=GPLD1 PE=4 SV=2 - [E2RK02_CANLF]	40.62	1	28	28	231	842	92.7827	6.15088	0.962192	0.952756	0.957474	1.0297	1.04679	1.03824	1.08436	0.557926
E2R6Z2	Uncharacterized protein OS=Canis lupus familiaris GN=PTPRS PE=4 SV=2 - [E2R6Z2_CANLF]	1.09	1	1	1	2	1921	210.505	7.76709	1.44242	1.20081	1.32161	1.20284	1.24516	1.224	0.926142	0.560087
J9NZT2	Uncharacterized protein OS=Canis lupus familiaris PE=4 SV=1 - [J9NZT2_CANLF]	52	1	4	5	98	125	13.4857	8.80713	1.05507	1.21169	1.13338	1.01899	1.4363	1.22764	1.08317	0.563179
Q28278	Vitamin K-dependent protein C OS=Canis lupus familiaris GN=PROC PE=2 SV=2 - [PROC_CANLF]	12.28	2	5	5	16	456	50.7805	6.12549	1.1679	1.06964	1.11877	0.972093	1.10205	1.03707	0.926975	0.564773
J9JHH5	Uncharacterized protein OS=Canis lupus familiaris GN=JCHAIN PE=4 SV=1 - [J9JHH5_CANLF]	47.17	1	7	7	79	159	18.2399	4.81787	0.977357	0.969652	0.973505	0.963944	0.840935	0.90244	0.927001	0.564919
J9P5S6	Uncharacterized protein OS=Canis lupus familiaris GN=LOC490399 PE=4 SV=1 - [J9P5S6_CANLF]	16.87	2	7	7	26	498	54.0562	5.5542	0.822155	0.933128	0.877642	0.972094	0.92698	0.949537	1.08192	0.568745
J9P6Z9	Uncharacterized protein OS=Canis lupus familiaris PE=4 SV=1 - [J9P6Z9_CANLF]	64.66	1	2	4	95	116	12.5182	6.59521	0.971882	0.980555	0.976219	1.02148	1.09051	1.056	1.08172	0.569621
P00011	Cytochrome c OS=Canis lupus familiaris GN=CYCS PE=1 SV=2 - [CYC_CANLF]	40.95	1	4	4	16	105	11.6251	9.5835	0.599554	0.65302	0.626287	0.662288	0.692243	0.677265	1.0814	0.571075
E2QZ98	Uncharacterized protein OS=Canis lupus familiaris GN=ANGPTL3 PE=4 SV=1 - [E2QZ98_CANLF]	8.06	2	4	4	6	459	53.7903	6.99072	1.0867	1.21965	1.15318	1.04566	1.09485	1.07026	0.928096	0.571102
F1PKX3	Uncharacterized protein OS=Canis lupus familiaris GN=F13A1 PE=4 SV=2 - [F1PKX3_CANLF]	35.06	1	21	21	68	733	83.3351	6.20166	1.05496	1.12437	1.08966	0.974878	1.04914	1.01201	0.928735	0.574726
F1PBT3	Fructose-bisphosphate aldolase OS=Canis lupus familiaris PE=3 SV=2 - [F1PBT3_CANLF]	6.99	7	4	4	7	701	74.8497	7.44482	1.10751	1.07571	1.09161	0.763258	1.59387	1.17857	1.07966	0.578888
J9P590	Uncharacterized protein OS=Canis lupus familiaris PE=4 SV=1 - [J9P590_CANLF]	50	1	3	3	14	136	14.392	5.8208	0.949987	0.781818	0.865902	0.879056	0.730745	0.8049	0.929551	0.579358
J9P182	Uncharacterized protein OS=Canis lupus familiaris PE=4 SV=1 - [J9P182_CANLF]	65.25	1	3	5	110	118	12.7604	7.97217	0.923435	0.983682	0.953558	1.03362	1.02427	1.02895	1.07906	0.581587
F1PVR0	Uncharacterized protein OS=Canis lupus familiaris GN=MMP8 PE=3 SV=2 - [F1PVR0_CANLF]	4.2	1	2	2	8	476	54.237	6.34131	0.73298	0.700962	0.716971	0.829482	0.715321	0.772401	1.07731	0.589524
E2R141	Uncharacterized protein OS=Canis lupus familiaris GN=C8B PE=4 SV=1 - [E2R141_CANLF]	39.66	1	18	18	95	590	66.9556	7.79639	1.03165	0.954306	0.99298	1.05166	1.08429	1.06798	1.07553	0.597696
F1PSS2	Uncharacterized protein OS=Canis lupus familiaris GN=THBS4 PE=4 SV=2 - [F1PSS2_CANLF]	5.84	2	4	4	6	873	96.1207	4.61475	1.12694	1.08228	1.10461	1.0378	1.0243	1.03105	0.933405	0.601425
F2Z4Q7	Uncharacterized protein OS=Canis lupus familiaris GN=SERPINF1 PE=3 SV=1 - [F2Z4Q7_CANLF]	40.19	1	15	15	144	418	46.4724	7.18115	0.965806	1.00476	0.985285	0.939366	0.900459	0.919913	0.933651	0.602848
F1PG39	Uncharacterized protein OS=Canis lupus familiaris GN=ITIH2 PE=4 SV=2 - [F1PG39_CANLF]	37.66	1	30	30	308	948	107.17	7.53271	1.0055	1.02176	1.01363	1.08016	1.09791	1.08903	1.07439	0.602948
P01784	Ig heavy chain V region GOM OS=Canis lupus familiaris PE=1 SV=1 - [HV01_CANLF]	42.98	1	2	3	206	114	12.4221	5.40186	1.04557	0.989796	1.01768	1.05456	1.13117	1.09286	1.07387	0.60532
Q95J95	Adiponectin (Fragment) OS=Canis lupus familiaris GN=APM1 PE=2 SV=1 - [Q95J95_CANLF]	31.44	3	5	5	101	194	20.8765	8.00146	0.989125	0.983233	0.986179	0.943324	0.899548	0.921436	0.93435	0.606879
F1PR54	Uncharacterized protein OS=Canis lupus familiaris GN=LTF PE=3 SV=1 - [F1PR54_CANLF]	38.84	4	23	25	177	708	77.2458	8.23584	0.850074	0.808269	0.829172	0.921917	0.85663	0.889273	1.07248	0.611771
J9JHE6	Uncharacterized protein OS=Canis lupus familiaris GN=DNAH10 PE=4 SV=1 - [J9JHE6_CANLF]	0.65	3	2	2	3	4028	464.092	6.03662	0.723259	1.24966	0.986457	0.80533	1.30817	1.05675	1.07126	0.617494
F1PCK2	Uncharacterized protein OS=Canis lupus familiaris GN=A1BG PE=4 SV=2 - [F1PCK2_CANLF]	53.47	1	21	21	672	533	57.8615	6.04932	1.00179	1.05319	1.02749	1.09363	1.10706	1.10034	1.0709	0.619153
J9NYC5	Uncharacterized protein OS=Canis lupus familiaris GN=CAECAM1 PE=4 SV=1 - [J9NYC5_CANLF]	10.49	16	4	4	14	429	46.8312	6.78564	0.884401	0.873385	0.878893	0.946805	0.933996	0.9404	1.06998	0.623479
E2QVU9	Uncharacterized protein OS=Canis lupus familiaris GN=BLVRB PE=4 SV=1 - [E2QVU9_CANLF]	26.7	1	3	3	4	206	22.0653	7.59131	0.997431	0.970925	0.984178	0.981389	1.12458	1.05299	1.06992	0.623795
F1PB85	Uncharacterized protein OS=Canis lupus familiaris GN=SERPINA7 PE=3 SV=2 - [F1PB85_CANLF]	33.57	2	12	12	65	414	46.5041	7.04932	0.825873	0.878685	0.852279	0.885087	0.937577	0.911332	1.06929	0.626748
F1PDJ7	Uncharacterized protein OS=Canis lupus familiaris GN=AZGP1 PE=3 SV=2 - [F1PDJ7_CANLF]	55.24	2	17	17	156	315	35.8324	4.91943	0.961356	0.961489	0.961422	0.908903	0.894609	0.901756	0.93794	0.627749
J9PB28	Uncharacterized protein OS=Canis lupus familiaris GN=FGL2 PE=4 SV=1 - [J9PB28_CANLF]	8.62	1	4	4	11	441	48.977	7.03467	1.03428	1.04728	1.04078	0.997715	0.955386	0.97655	0.938286	0.629774
F1PXD6	Uncharacterized protein OS=Canis lupus familiaris GN=PRG4 PE=4 SV=2 - [F1PXD6_CANLF]	10.54	1	9	9	38	854	94.2901	9.64209	1.03146	0.993899	1.01268	0.955555	0.945464	0.950509	0.938606	0.631649
F6XKC0	Uncharacterized protein OS=Canis lupus familiaris GN=C8G PE=3 SV=1 - [F6XKC0_CANLF]	34.65	2	5	5	24	202	22.5297	8.67529	1.13389	1.10777	1.12083	1.03719	1.06719	1.05219	0.938759	0.632541
F1Q1K9	Uncharacterized protein OS=Canis lupus familiaris GN=HABP2 PE=3 SV=2 - [F1Q1K9_CANLF]	17.35	2	13	13	68	559	62.4718	6.97607	1.03028	0.93347	0.981877	0.942788	0.901279	0.922033	0.939052	0.634261
E2QV08	Malate dehydrogenase OS=Canis lupus familiaris GN=MDH1 PE=3 SV=2 - [E2QV08_CANLF]	18.97	2	6	6	19	348	38.222	7.94287	0.764302	0.682132	0.723217	0.682483	0.676142	0.679312	0.939293	0.635675
J9NST4	Uncharacterized protein OS=Canis lupus familiaris GN=SEPP1 PE=4 SV=1 - [J9NST4_CANLF]	9.2	1	3	3	18	163	19.0712	6.69775	0.998808	0.944655	0.971732	0.89007	0.936372	0.913221	0.939787	0.638577
J9P1F6	Uncharacterized protein OS=Canis lupus familiaris PE=4 SV=1 - [J9P1F6_CANLF]	31.91	1	2	3	77	141	15.1004	8.30908	1.02445	1.07473	1.04959	1.12245	1.11629	1.11937	1.06648	0.640069
J9NYY8	Uncharacterized protein OS=Canis lupus familiaris PE=4 SV=1 - [J9NYY8_CANLF]	73.2	1	2	4	300	97	10.5642	7.95752	0.896264	0.919801	0.908033	1.00797	0.928356	0.968162	1.06622	0.641325
E2RC23	Uncharacterized protein OS=Canis lupus familiaris GN=PCOLCE PE=4 SV=1 - [E2RC23_CANLF]	8.08	1	2	2	2	458	48.5552	7.09326	1.05287	1.52104	1.28695	1.38087	1.35938	1.37012	1.06462	0.648974
L7N0N6	Alpha-amylase OS=Canis lupus familiaris GN=AMY2B PE=3 SV=1 - [L7N0N6_CANLF]	37.42	4	11	11	47	449	51.3139	7.62061	0.97462	0.965958	0.970289	1.06979	0.995844	1.03282	1.06444	0.649854
Q6TN20	Cathelicidin OS=Canis lupus familiaris GN=CAMP PE=2 SV=1 - [Q6TN20_CANLF]	31.4	1	5	5	11	172	19.4252	8.42627	0.904242	1.14329	1.02377	1.07012	1.10834	1.08923	1.06394	0.652255
E2R9D2	Uncharacterized protein OS=Canis lupus familiaris GN=F12 PE=3 SV=2 - [E2R9D2_CANLF]	21.8	1	7	7	18	399	43.1163	8.70459	0.968351	0.950324	0.959337	0.892723	0.916358	0.904541	0.942881	0.656827
F1PNY2	Uncharacterized protein OS=Canis lupus familiaris PE=4 SV=2 - [F1PNY2_CANLF]	51.26	6	7	9	205	238	26.2349	5.80811	0.919497	0.955901	0.937699	0.858709	0.909922	0.884315	0.943069	0.657947
F1PNY4	Keratinocyte differentiation-associated protein OS=Canis lupus familiaris GN=KRTDAP PE=4 SV=2 - [F1PNY4_CANLF]	31.63	3	2	2	6	98	10.8588	9.5249	1.38157	1.37321	1.37739	1.3359	1.26258	1.29924	0.943265	0.659108
J9P4E8	Uncharacterized protein OS=Canis lupus familiaris PE=4 SV=1 - [J9P4E8_CANLF]	66.37	6	3	5	110	113	12.4501	8.32373	1.19108	1.22581	1.20845	1.12208	1.15913	1.14061	0.943862	0.662649
F1Q4D9	Uncharacterized protein OS=Canis lupus familiaris GN=RBP4 PE=3 SV=1 - [F1Q4D9_CANLF]	72.51	3	13	13	122	211	23.8176	5.71924	0.948622	0.949899	0.94926	0.891696	0.900851	0.896273	0.944181	0.664544
P49822	Serum albumin OS=Canis lupus familiaris GN=ALB PE=1 SV=3 - [ALBU_CANLF]	90.63	4	4	79	12581	608	68.56	5.69385	0.927756	0.955753	0.941754	0.893946	0.884829	0.889387	0.944394	0.665811
F1PAB0	Uncharacterized protein OS=Canis lupus familiaris PE=4 SV=2 - [F1PAB0_CANLF]	18.1	1	7	7	19	569	62.1199	5.26221	0.99713	0.970872	0.984001	0.943696	0.915514	0.929605	0.944719	0.667746
E2QUV3	Uncharacterized protein OS=Canis lupus familiaris GN=AHSG PE=4 SV=2 - [E2QUV3_CANLF]	44.38	1	14	14	636	365	39.2228	5.31299	1.08416	1.08867	1.08641	1.06609	0.986843	1.02647	0.94482	0.668347
J9P3L5	Uncharacterized protein OS=Canis lupus familiaris PE=4 SV=1 - [J9P3L5_CANLF]	30.61	1	1	3	73	147	15.5746	4.83057	1.05455	1.15127	1.10291	1.14766	1.1914	1.16953	1.0604	0.669449
F1PAL5	Uncharacterized protein OS=Canis lupus familiaris GN=AGT PE=3 SV=2 - [F1PAL5_CANLF]	40.88	4	20	20	208	477	51.7168	5.98584	0.927366	0.933317	0.930341	0.890753	0.868904	0.879828	0.945705	0.67362
F1Q041	Uncharacterized protein OS=Canis lupus familiaris GN=F13B PE=4 SV=2 - [F1Q041_CANLF]	28.04	1	17	17	76	649	74.2595	6.65381	0.967014	0.895545	0.93128	0.977135	0.996314	0.986725	1.05954	0.673692
J9NXX1	Uncharacterized protein OS=Canis lupus familiaris GN=ZBED8 PE=4 SV=1 - [J9NXX1_CANLF]	1.01	3	1	1	3	594	68.0356	6.41748	0.849819	0.87168	0.86075	0.98782	0.835656	0.911738	1.05924	0.675163
F6Y713	Alpha-1-acid glycoprotein OS=Canis lupus familiaris GN=ORM1 PE=3 SV=1 - [F6Y713_CANLF]	53.17	1	14	14	454	205	23.2906	5.59229	0.950411	0.972405	0.961408	0.92172	0.89877	0.910245	0.946783	0.680063
F1PHN8	Uncharacterized protein OS=Canis lupus familiaris GN=SERPINA4 PE=3 SV=2 - [F1PHN8_CANLF]	30.35	1	12	12	65	425	48.451	7.40088	0.929564	0.972358	0.950961	0.997993	1.01453	1.00626	1.05815	0.680504
J9P7Q8	Carboxylic ester hydrolase OS=Canis lupus familiaris GN=CEL PE=3 SV=1 - [J9P7Q8_CANLF]	20.22	2	12	12	47	643	69.925	6.31592	0.954145	1.04604	1.00009	1.08816	1.02796	1.05806	1.05796	0.681437
F1PA63	Uncharacterized protein OS=Canis lupus familiaris GN=LCAT PE=4 SV=1 - [F1PA63_CANLF]	11.42	1	3	3	9	438	49.704	6.16357	0.932314	1.15979	1.04605	0.883566	1.09788	0.990721	0.947106	0.681992
J9P319	Uncharacterized protein OS=Canis lupus familiaris GN=OMD PE=4 SV=1 - [J9P319_CANLF]	13.53	2	5	5	12	414	48.4607	5.35107	1.15651	0.954867	1.05569	0.917304	1.08397	1.00064	0.947855	0.686479
F1PF90	Uncharacterized protein OS=Canis lupus familiaris PE=4 SV=2 - [F1PF90_CANLF]	29.5	1	5	5	22	139	14.8584	5.37646	0.974569	0.893657	0.934113	0.95143	0.819719	0.885575	0.948038	0.687577
Q28284	CD44 antigen (Fragment) OS=Canis lupus familiaris GN=CD44 PE=2 SV=1 - [CD44_CANLF]	8.83	3	3	3	19	351	38.0426	6.34131	0.932017	0.984624	0.95832	0.912021	0.905068	0.908544	0.948059	0.687704
E2RJT2	Uncharacterized protein OS=Canis lupus familiaris GN=BST1 PE=4 SV=2 - [E2RJT2_CANLF]	15.05	1	4	4	12	319	35.3646	5.80811	1.01873	0.968281	0.993504	0.999579	0.88503	0.942305	0.948466	0.690148
J9NS29	Cystatin OS=Canis lupus familiaris GN=LOC607874 PE=3 SV=1 - [J9NS29_CANLF]	18.95	1	1	1	4	153	16.3785	9.31982	1.34016	1.49845	1.4193	1.41238	1.58037	1.49638	1.0543	0.699615
E2RKQ6	Uncharacterized protein OS=Canis lupus familiaris GN=LGALS3BP PE=4 SV=1 - [E2RKQ6_CANLF]	15.21	1	6	6	15	559	62.1708	5.31299	0.869251	0.921617	0.895434	0.904212	0.983884	0.944048	1.05429	0.699676
J9JHN3	Uncharacterized protein OS=Canis lupus familiaris PE=4 SV=1 - [J9JHN3_CANLF]	50.38	1	3	5	61	133	14.5132	8.33838	1.03466	1.09695	1.06581	0.981611	1.04358	1.01259	0.950074	0.69982
E2RNW1	Uncharacterized protein OS=Canis lupus familiaris GN=PIBF1 PE=4 SV=1 - [E2RNW1_CANLF]	0.92	1	1	1	5	757	90.1146	6.04932	0.970738	1.05705	1.01389	0.964704	0.962744	0.963724	0.950518	0.702491
E2R997	Uncharacterized protein OS=Canis lupus familiaris GN=PBLD PE=4 SV=2 - [E2R997_CANLF]	2.75	2	1	1	3	255	28.2147	7.10791	0.787609	0.715136	0.751372	0.772566	0.65749	0.715028	0.951629	0.709202
F1Q117	Uncharacterized protein OS=Canis lupus familiaris GN=ATRN PE=4 SV=2 - [F1Q117_CANLF]	9.6	2	13	13	29	1417	156.901	7.38623	0.865307	0.831865	0.848586	0.879936	0.905979	0.892958	1.05229	0.709727
E2R5W6	Uncharacterized protein OS=Canis lupus familiaris GN=GC PE=4 SV=2 - [E2R5W6_CANLF]	65.61	6	35	35	961	474	52.9396	5.32568	1.03183	1.053	1.04242	1.0058	0.979046	0.992425	0.952042	0.711697
J9P6T3	Uncharacterized protein OS=Canis lupus familiaris GN=PLTP PE=4 SV=1 - [J9P6T3_CANLF]	29.49	2	9	9	31	495	54.6636	7.21045	1.15335	1.20761	1.18048	1.16674	1.08351	1.12513	0.953109	0.718157
J9P0V6	Uncharacterized protein OS=Canis lupus familiaris PE=4 SV=1 - [J9P0V6_CANLF]	31.91	1	2	3	43	141	14.8793	8.08936	1.06802	1.09435	1.08119	1.02709	1.03735	1.03222	0.954714	0.727898
F1PWW0	Uncharacterized protein OS=Canis lupus familiaris GN=FLNA PE=4 SV=2 - [F1PWW0_CANLF]	2.57	4	5	5	16	2646	280.484	6.11279	1.11078	1.13005	1.12042	1.16326	0.976544	1.0699	0.954913	0.729113
F1PP29	Uncharacterized protein OS=Canis lupus familiaris GN=IGHE PE=4 SV=1 - [F1PP29_CANLF]	17.05	1	6	6	14	440	48.6272	7.43018	1.11534	1.06649	1.09092	1.01782	1.0659	1.04186	0.955028	0.729812
P05123	Creatine kinase M-type OS=Canis lupus familiaris GN=CKM PE=1 SV=3 - [KCRM_CANLF]	51.71	2	14	14	62	381	43.1259	7.25439	0.577081	0.511617	0.544349	0.547767	0.492249	0.520008	0.955284	0.731367
L7N0E7	Uncharacterized protein OS=Canis lupus familiaris GN=LOC612180 PE=4 SV=1 - [L7N0E7_CANLF]	31.03	1	1	3	53	145	15.2555	5.35107	1.19143	1.33694	1.26419	1.18671	1.23021	1.20846	0.955918	0.735227
E2R416	Uncharacterized protein OS=Canis lupus familiaris GN=LUM PE=4 SV=1 - [E2R416_CANLF]	38.76	1	11	11	59	338	38.3228	6.68311	1.03557	1.03623	1.0359	0.965223	1.01704	0.991131	0.956781	0.740487
E2RT38	Uncharacterized protein OS=Canis lupus familiaris GN=MGAM PE=3 SV=2 - [E2RT38_CANLF]	36.33	4	58	58	365	1833	207.228	5.90967	1.03395	1.03725	1.0356	1.06397	1.10237	1.08317	1.04594	0.742061
J9P669	Uncharacterized protein OS=Canis lupus familiaris GN=CDH5 PE=4 SV=1 - [J9P669_CANLF]	8.29	2	5	5	8	772	86.2344	5.2876	1.10053	1.16737	1.13395	1.08015	1.09047	1.08531	0.957105	0.742462
E2RH18	Uncharacterized protein OS=Canis lupus familiaris GN=CFP PE=4 SV=1 - [E2RH18_CANLF]	9.05	1	3	3	13	464	50.5038	8.08936	1.04277	1.00003	1.0214	0.983253	0.972586	0.977919	0.957431	0.744454
F1P903	Uncharacterized protein OS=Canis lupus familiaris GN=C1R PE=3 SV=2 - [F1P903_CANLF]	41.13	5	27	27	166	705	80.0791	6.23975	0.893727	0.922994	0.908361	0.939912	0.959206	0.949559	1.04535	0.745063
F1Q185	Uncharacterized protein OS=Canis lupus familiaris PE=4 SV=2 - [F1Q185_CANLF]	29.33	1	3	3	20	150	16.0739	5.74463	0.998413	1.10718	1.0528	0.954536	1.06197	1.00825	0.957688	0.746023
A9QU57	CD14 antigen (Fragment) OS=Canis lupus familiaris GN=CD14 PE=2 SV=1 - [A9QU57_CANLF]	43.4	1	3	3	12	106	11.2929	9.27588	0.862789	0.820458	0.841623	0.806402	0.951573	0.878988	1.0444	0.750012
E2RI99	Signal transducer and activator of transcription OS=Canis lupus familiaris GN=STAT1 PE=3 SV=2 - [E2RI99_CANLF]	0.93	2	1	1	18	750	87.2265	6.12549	0.705884	0.978796	0.84234	0.720873	0.893716	0.807294	0.958395	0.750345
J9PAA4	Uncharacterized protein OS=Canis lupus familiaris GN=CPN2 PE=4 SV=1 - [J9PAA4_CANLF]	33.27	1	15	15	136	547	59.1545	6.58057	1.07585	1.00289	1.03937	1.07739	1.09343	1.08541	1.0443	0.750513
J9PAX5	Uncharacterized protein OS=Canis lupus familiaris PE=4 SV=1 - [J9PAX5_CANLF]	51.13	1	3	5	119	133	14.6742	7.76709	0.93416	0.929833	0.931997	0.996044	0.950492	0.973268	1.04428	0.750597
E2RLA5	Uncharacterized protein OS=Canis lupus familiaris GN=GOLM1 PE=4 SV=2 - [E2RLA5_CANLF]	19.46	1	7	7	16	406	45.5549	4.79248	1.00527	1.00306	1.00417	1.0471	1.04978	1.04844	1.04409	0.751606
F1PKB2	Alpha-mannosidase OS=Canis lupus familiaris GN=MAN2B1 PE=3 SV=2 - [F1PKB2_CANLF]	8.54	1	7	7	17	1007	113.05	7.66455	0.980787	1.10179	1.04129	1.06203	1.11128	1.08665	1.04357	0.754309
F1PQ85	Uncharacterized protein OS=Canis lupus familiaris GN=MASP1 PE=3 SV=2 - [F1PQ85_CANLF]	16.51	2	9	10	26	763	85.5982	4.93213	1.14342	1.0352	1.08931	1.12465	1.14882	1.13674	1.04354	0.754462
F1PZC6	Uncharacterized protein OS=Canis lupus familiaris GN=HRG PE=4 SV=2 - [F1PZC6_CANLF]	27.19	1	15	15	417	537	59.995	7.26904	1.07444	1.11761	1.09603	1.06053	1.04247	1.0515	0.959375	0.756345
F1P9E5	Platelet-activating factor acetylhydrolase OS=Canis lupus familiaris GN=PLA2G7 PE=4 SV=1 - [F1P9E5_CANLF]	36.26	2	13	13	46	444	50.1183	6.48096	0.963543	1.02601	0.994775	0.976436	0.932717	0.954576	0.95959	0.757661
E2RFV9	Uncharacterized protein OS=Canis lupus familiaris GN=C9 PE=4 SV=2 - [E2RFV9_CANLF]	32.37	2	17	17	104	553	62.0976	5.35107	0.917774	0.916371	0.917072	0.947867	0.963765	0.955816	1.04225	0.761157
P19540	Coagulation factor IX OS=Canis lupus familiaris GN=F9 PE=1 SV=1 - [FA9_CANLF]	23.23	2	10	10	43	452	50.7948	6.17627	0.858902	0.893327	0.876115	0.859706	0.822896	0.841301	0.960263	0.761789
J9P4B4	Uncharacterized protein OS=Canis lupus familiaris GN=C1QA PE=4 SV=1 - [J9P4B4_CANLF]	14.77	1	2	2	6	264	27.7669	8.82178	1.24766	1.30178	1.27472	1.41158	1.24462	1.3281	1.04188	0.763088
E2QWN7	Uncharacterized protein OS=Canis lupus familiaris GN=LCP1 PE=4 SV=1 - [E2QWN7_CANLF]	30.62	3	16	16	42	627	70.1848	5.32568	0.890296	0.940635	0.915465	0.942847	0.964641	0.953744	1.04181	0.763418
J9P028	Glutathione peroxidase OS=Canis lupus familiaris GN=GPX3 PE=3 SV=1 - [J9P028_CANLF]	60.78	4	9	9	106	153	17.3259	7.97217	0.951585	0.9938	0.972692	1.02511	1.00132	1.01322	1.04166	0.764211
F6UMP8	Uncharacterized protein OS=Canis lupus familiaris GN=LOC611458 PE=4 SV=1 - [F6UMP8_CANLF]	57.33	1	1	76	1434	1481	166.198	6.65381	1.23039	1.2385	1.23445	1.31339	1.25821	1.2858	1.0416	0.764517
A1ILJ0	Alpha 1 antitrypsin OS=Canis lupus familiaris PE=2 SV=1 - [A1ILJ0_CANLF]	40	3	1	17	776	415	46.2767	5.89697	0.926171	0.98379	0.954981	1.0337	0.954415	0.994056	1.04092	0.76809
E2R1C3	Proteasome subunit alpha type OS=Canis lupus familiaris PE=3 SV=2 - [E2R1C3_CANLF]	21.77	1	3	3	13	248	27.6481	7.10791	1.08793	1.0883	1.08812	1.11934	1.1457	1.13252	1.04081	0.768639
E2RMF9	Uncharacterized protein OS=Canis lupus familiaris GN=SERPINA5 PE=3 SV=1 - [E2RMF9_CANLF]	35.38	1	11	11	59	407	45.7925	8.44092	0.905961	0.910659	0.90831	0.947394	0.943026	0.94521	1.04062	0.769618
F1PNS6	Uncharacterized protein OS=Canis lupus familiaris GN=PEPD PE=3 SV=2 - [F1PNS6_CANLF]	25.13	1	9	9	37	386	43.151	5.65576	1.05025	1.08949	1.06987	1.01543	1.04289	1.02916	0.961953	0.772164
J9NSF9	Prothrombin OS=Canis lupus familiaris GN=F2 PE=3 SV=1 - [J9NSF9_CANLF]	52.33	4	30	30	343	621	70.2585	5.99854	0.971063	0.978688	0.974876	1.03547	0.991823	1.01365	1.03977	0.774085
E2RRQ0	Uncharacterized protein OS=Canis lupus familiaris GN=SON PE=4 SV=1 - [E2RRQ0_CANLF]	0.58	2	1	1	3	2415	262.267	5.59229	1.34658	0.948704	1.14764	1.17095	1.21456	1.19275	1.03931	0.776509
H9GW55	Uncharacterized protein OS=Canis lupus familiaris GN=PGAM2 PE=3 SV=1 - [H9GW55_CANLF]	4.74	1	1	1	2	253	28.5917	8.73389	0.824117	0.716835	0.770476	0.819845	0.779597	0.799721	1.03796	0.783626
J9P9G4	Proteasome subunit alpha type OS=Canis lupus familiaris PE=3 SV=1 - [J9P9G4_CANLF]	23.57	6	6	6	15	263	29.3158	6.60986	1.08922	0.980151	1.03469	1.05247	0.944163	0.998317	0.96485	0.790002
F1PHS2	Uncharacterized protein OS=Canis lupus familiaris GN=SERPINA6 PE=3 SV=2 - [F1PHS2_CANLF]	32.67	7	13	13	51	404	45.447	6.02393	1.02866	0.994511	1.01158	0.932804	1.02029	0.976546	0.965363	0.793166
F1PG16	Uncharacterized protein OS=Canis lupus familiaris GN=CD5L PE=4 SV=2 - [F1PG16_CANLF]	59.71	3	19	19	269	340	37.6728	5.69385	0.947779	0.951673	0.949726	0.975228	0.992594	0.983911	1.03599	0.793995
F1PSS8	Uncharacterized protein OS=Canis lupus familiaris GN=PROS1 PE=4 SV=2 - [F1PSS8_CANLF]	28.87	1	21	21	157	679	75.9506	5.59229	1.0213	1.01067	1.01598	0.964795	0.997341	0.981068	0.965634	0.794834
E2RGT6	Uncharacterized protein OS=Canis lupus familiaris GN=C6 PE=4 SV=2 - [E2RGT6_CANLF]	39.74	1	34	34	181	936	105.466	6.43018	0.986447	0.956412	0.97143	0.953897	0.922761	0.938329	0.965926	0.796639
E2RLN1	Uncharacterized protein OS=Canis lupus familiaris GN=SERPIND1 PE=3 SV=1 - [E2RLN1_CANLF]	47.18	2	22	22	232	496	56.6357	6.26514	0.893591	0.921293	0.907442	0.883554	0.869911	0.876733	0.966158	0.798075
L7N0E8	Uncharacterized protein OS=Canis lupus familiaris PE=4 SV=1 - [L7N0E8_CANLF]	39.84	1	3	5	41	123	13.8135	4.93213	0.892921	0.896086	0.894503	0.884694	0.844052	0.864373	0.966316	0.799051
L7N0L9	Uncharacterized protein OS=Canis lupus familiaris PE=3 SV=1 - [L7N0L9_CANLF]	3.72	3	1	1	3	349	38.4703	7.44482	1.3768	1.30562	1.34121	1.30281	1.29276	1.29779	0.967625	0.807139
F1PJ74	Apolipoprotein E OS=Canis lupus familiaris GN=APOE PE=3 SV=1 - [F1PJ74_CANLF]	61.92	5	2	23	261	323	37.2012	5.30029	0.651818	0.590629	0.621224	0.591697	0.610667	0.601182	0.967738	0.807841
J9NVC6	Uncharacterized protein OS=Canis lupus familiaris PE=4 SV=1 - [J9NVC6_CANLF]	33.71	2	17	19	1030	620	67.6004	5.31299	0.905943	0.922659	0.914301	0.940588	0.947091	0.943839	1.03231	0.813631
F6UVK4	Uncharacterized protein OS=Canis lupus familiaris GN=ENPP2 PE=4 SV=1 - [F6UVK4_CANLF]	5.18	1	4	4	9	888	101.897	7.51807	1.07301	0.89703	0.985021	0.932689	0.975672	0.954181	0.96869	0.81373
F1PCB5	Aminopeptidase N OS=Canis lupus familiaris GN=ANPEP PE=4 SV=2 - [F1PCB5_CANLF]	2.56	1	2	2	2	975	110.188	6.17627	0.830708	1.06133	0.946019	0.873558	0.959644	0.916601	0.968904	0.815052
H9GWR0	Uncharacterized protein OS=Canis lupus familiaris PE=4 SV=2 - [H9GWR0_CANLF]	36	2	1	3	88	125	12.9722	5.89697	1.12969	1.14092	1.13531	1.09896	1.24313	1.17105	1.03148	0.818058
F1PPZ2	Ribonuclease A B1 OS=Canis lupus familiaris GN=RNASE4 PE=3 SV=2 - [F1PPZ2_CANLF]	8.97	1	1	1	6	145	16.5272	9.0415	0.98439	1.00067	0.992533	0.98673	1.06051	1.02362	1.03132	0.818899
B5LX43	Factor XI OS=Canis lupus familiaris PE=2 SV=1 - [B5LX43_CANLF]	12.18	2	6	7	15	624	69.7483	8.14795	1.01415	0.957251	0.985699	1.03279	0.99965	1.01622	1.03097	0.820823
Q7M321	Plasmin (Fragments) OS=Canis lupus familiaris PE=4 SV=1 - [Q7M321_CANLF]	70	2	1	8	76	120	13.4782	6.87354	0.99771	1.03143	1.01457	1.04424	1.04764	1.04594	1.03092	0.821088
E2RPW3	Uncharacterized protein OS=Canis lupus familiaris GN=PON1 PE=4 SV=2 - [E2RPW3_CANLF]	40.17	1	12	12	226	356	40.1427	5.42725	1.00718	1.08922	1.0482	1.00972	1.02379	1.01675	0.970002	0.821855
F1Q2N0	Uncharacterized protein OS=Canis lupus familiaris GN=PCLO PE=4 SV=2 - [F1Q2N0_CANLF]	0.18	1	1	1	6	4881	529.201	6.29053	1.1176	1.12066	1.11913	1.14487	1.02699	1.08593	0.970335	0.823921
E2RPB8	Uncharacterized protein OS=Canis lupus familiaris GN=CLEC3B PE=4 SV=2 - [E2RPB8_CANLF]	45.71	1	7	7	69	175	19.1312	5.5415	1.04263	1.05059	1.04661	1.02821	1.00393	1.01607	0.970819	0.826922
F6UME0	Uncharacterized protein OS=Canis lupus familiaris GN=A2M PE=4 SV=1 - [F6UME0_CANLF]	61.97	2	73	73	1689	1475	165.114	6.7124	1.02426	1.0287	1.02648	1.00121	0.992636	0.996925	0.971211	0.829349
J9PB14	Uncharacterized protein OS=Canis lupus familiaris GN=BTD PE=4 SV=1 - [J9PB14_CANLF]	28.76	2	14	14	66	532	59.4723	6.03662	1.07054	1.04474	1.05764	1.05309	1.00133	1.02721	0.971226	0.829447
F1PNV5	Prekallikrein OS=Canis lupus familiaris GN=KLKB1 PE=2 SV=2 - [F1PNV5_CANLF]	28.93	2	15	17	62	636	70.8423	7.95752	0.982792	0.956134	0.969463	0.986675	1.00916	0.997916	1.02935	0.829519
J9P716	Uncharacterized protein OS=Canis lupus familiaris GN=TUBB1 PE=3 SV=1 - [J9P716_CANLF]	4.87	2	1	2	4	596	65.2055	5.78271	1.2059	1.18577	1.19583	1.44715	1.01341	1.23028	1.02881	0.832452
E2QZ19	Uncharacterized protein OS=Canis lupus familiaris GN=AFM PE=4 SV=1 - [E2QZ19_CANLF]	59.63	2	37	37	383	602	68.9231	5.26221	0.992704	1.00018	0.99644	0.951913	0.984863	0.968388	0.971848	0.833301
P52784	ATP-dependent 6-phosphofructokinase, muscle type OS=Canis lupus familiaris GN=PFKM PE=2 SV=2 - [PFKAM_CANLF]	2.17	2	1	1	2	782	85.5066	8.08936	0.729736	1.33088	1.03031	1.09932	0.903391	1.00135	0.971898	0.833615
F1P6E1	Uncharacterized protein OS=Canis lupus familiaris GN=C1S PE=3 SV=2 - [F1P6E1_CANLF]	35.68	1	22	23	206	695	77.4802	4.93213	1.02287	0.991458	1.00716	1.03492	1.03675	1.03584	1.02847	0.834275
F6Y3P9	Uncharacterized protein OS=Canis lupus familiaris GN=GSN PE=4 SV=1 - [F6Y3P9_CANLF]	39.34	3	30	30	335	783	85.1912	6.50732	1.02805	1.0353	1.03168	1.0029	1.00325	1.00307	0.972274	0.835945
E2R9B6	Uncharacterized protein OS=Canis lupus familiaris GN=FETUB PE=4 SV=1 - [E2R9B6_CANLF]	61.04	1	20	20	284	385	42.3063	5.92236	1.05878	1.03244	1.04561	1.02781	1.00623	1.01702	0.972659	0.838338
E2REV6	Uncharacterized protein OS=Canis lupus familiaris GN=PTPRG PE=4 SV=2 - [E2REV6_CANLF]	2.15	2	2	2	2	1301	144.829	6.23975	1.15226	1.0545	1.10338	1.07843	1.18854	1.13349	1.02729	0.840674
L7N0P9	Uncharacterized protein OS=Canis lupus familiaris PE=4 SV=1 - [L7N0P9_CANLF]	43.65	4	2	5	98	126	13.5887	7.98682	0.978597	1.02834	1.00347	0.966896	0.986194	0.976545	0.973172	0.84152
E2R4V3	Uncharacterized protein OS=Canis lupus familiaris GN=SERPINF2 PE=3 SV=1 - [E2R4V3_CANLF]	52.34	1	22	22	224	491	54.9185	7.18115	0.920403	0.998139	0.959271	0.93077	0.937172	0.933971	0.973626	0.84434
F1P707	Uncharacterized protein OS=Canis lupus familiaris PE=4 SV=2 - [F1P707_CANLF]	36.91	2	52	52	341	1661	186.676	7.29834	0.964521	0.967569	0.966045	0.98602	0.996138	0.991079	1.02591	0.848122
J9NUF2	Uncharacterized protein OS=Canis lupus familiaris GN=FLT4 PE=3 SV=1 - [J9NUF2_CANLF]	5.16	2	5	5	11	1336	149.641	6.37939	1.22266	1.05215	1.1374	1.21901	1.11282	1.16592	1.02507	0.852717
H9GWY3	Uncharacterized protein OS=Canis lupus familiaris GN=ITIH4 PE=4 SV=2 - [H9GWY3_CANLF]	51.59	2	44	44	668	911	100.736	7.32764	0.917447	0.910812	0.91413	0.887739	0.89488	0.891309	0.975036	0.853105
F1Q4A3	Uncharacterized protein OS=Canis lupus familiaris GN=F10 PE=3 SV=2 - [F1Q4A3_CANLF]	17.71	2	8	8	46	497	54.628	5.17334	0.959784	0.929656	0.94472	0.96854	0.875126	0.921833	0.975774	0.857692
E2RL35	Phospholipase A2 OS=Canis lupus familiaris GN=PLA2G4F PE=4 SV=1 - [E2RL35_CANLF]	1.41	1	1	1	3	850	95.2711	5.36377	1.08105	1.10849	1.09477	1.156	0.980738	1.06837	0.975883	0.858367
F1PKR3	Uncharacterized protein OS=Canis lupus familiaris GN=VCL PE=4 SV=2 - [F1PKR3_CANLF]	16.29	3	15	15	28	1062	115.46	6.02393	1.11552	1.04376	1.07964	1.0689	1.03834	1.05362	0.9759	0.858477
J9NZW6	Uncharacterized protein OS=Canis lupus familiaris GN=APOF PE=4 SV=1 - [J9NZW6_CANLF]	6.94	1	1	1	2	288	31.5762	6.20166	1.2848	1.72853	1.50667	1.58121	1.50372	1.54247	1.02376	0.859842
F1PGM9	Uncharacterized protein OS=Canis lupus familiaris GN=C4BPA PE=4 SV=2 - [F1PGM9_CANLF]	49.81	1	22	22	310	514	57.9211	6.82959	0.908848	0.915916	0.912382	0.911942	0.955922	0.933932	1.02362	0.860627
J9P9X0	Uncharacterized protein OS=Canis lupus familiaris GN=IL1RAP PE=4 SV=1 - [J9P9X0_CANLF]	15.3	3	8	8	23	523	60.0296	5.98584	0.915588	0.956042	0.935815	0.915427	0.911873	0.91365	0.976314	0.861053
F1PMH6	Uncharacterized protein OS=Canis lupus familiaris GN=MRC1 PE=4 SV=2 - [F1PMH6_CANLF]	1.44	2	2	2	3	1455	165.602	6.50732	0.745176	0.957795	0.851485	0.84115	0.899616	0.870383	1.02219	0.868424
P56595	Apolipoprotein C-I OS=Canis lupus familiaris GN=APOC1 PE=1 SV=1 - [APOC1_CANLF]	31.82	1	6	6	123	88	9.73531	9.40771	0.969883	0.981804	0.975843	0.927502	0.980299	0.9539	0.977514	0.868513
E2R1N7	Uncharacterized protein OS=Canis lupus familiaris GN=PCYOX1 PE=4 SV=1 - [E2R1N7_CANLF]	16.24	1	6	6	11	505	56.6687	6.53662	1.09788	1.12521	1.11154	1.13196	1.14031	1.13614	1.02212	0.868811
F1Q418	Uncharacterized protein OS=Canis lupus familiaris GN=ITIH1 PE=4 SV=2 - [F1Q418_CANLF]	43.52	1	33	33	421	910	100.935	6.97607	0.99121	1.00876	0.999985	1.02146	1.02271	1.02209	1.0221	0.868936
J9P9J6	Uncharacterized protein OS=Canis lupus familiaris PE=4 SV=1 - [J9P9J6_CANLF]	53.85	1	14	14	220	338	36.9543	5.50342	0.963743	0.965154	0.964449	0.986308	0.984869	0.985589	1.02192	0.86993
F1PWR2	Uncharacterized protein OS=Canis lupus familiaris PE=4 SV=2 - [F1PWR2_CANLF]	56.42	3	78	78	1419	1753	192.771	6.88818	0.973614	0.972075	0.972845	0.995373	0.992645	0.994009	1.02175	0.870832
F1PAX2	Uncharacterized protein OS=Canis lupus familiaris GN=CP PE=3 SV=2 - [F1PAX2_CANLF]	38.59	2	38	38	497	1065	122.484	6.59521	0.927045	0.987947	0.957496	0.908333	0.965056	0.936694	0.978275	0.873249
E2QUY1	Uncharacterized protein OS=Canis lupus familiaris GN=RASA3 PE=4 SV=2 - [E2QUY1_CANLF]	0.72	1	1	1	9	834	95.6972	7.43018	0.876192	0.88068	0.878436	0.896079	0.824318	0.860199	0.979239	0.879248
J9P992	Uncharacterized protein OS=Canis lupus familiaris GN=MYO18A PE=3 SV=1 - [J9P992_CANLF]	0.72	2	1	1	2	1945	219.253	6.15088	1.24395	1.40998	1.32696	1.33779	1.36829	1.35304	1.01965	0.882402
F1PTS8	Uncharacterized protein OS=Canis lupus familiaris GN=KRT6A PE=3 SV=1 - [F1PTS8_CANLF]	12.08	21	3	7	24	571	60.6331	8.1626	1.16989	1.24052	1.2052	1.29857	1.15899	1.22878	1.01956	0.882887
F6V9A6	Uncharacterized protein OS=Canis lupus familiaris GN=COL6A3 PE=4 SV=1 - [F6V9A6_CANLF]	2.25	4	5	5	8	2671	288.972	8.55811	1.09489	1.11191	1.1034	1.12316	1.03949	1.08133	0.979996	0.883962
J9NUI6	Uncharacterized protein OS=Canis lupus familiaris GN=AMBP PE=4 SV=1 - [J9NUI6_CANLF]	41.55	2	11	11	71	349	38.8317	6.354	1.1838	1.17761	1.18071	1.13833	1.17599	1.15716	0.980057	0.884339
E2R109	Uncharacterized protein OS=Canis lupus familiaris GN=C8A PE=4 SV=1 - [E2R109_CANLF]	25.3	1	13	13	60	589	66.1596	6.93213	0.988273	0.955134	0.971703	1.01632	0.964219	0.990268	1.01911	0.885405
E2RQ71	Uncharacterized protein OS=Canis lupus familiaris GN=APOM PE=4 SV=2 - [E2RQ71_CANLF]	41.49	1	6	6	41	188	21.4155	6.85889	0.992518	0.963648	0.978083	1.01104	0.982233	0.996636	1.01897	0.886164
E2R8C5	Uncharacterized protein OS=Canis lupus familiaris GN=IGLV2-33 PE=4 SV=2 - [E2R8C5_CANLF]	12.9	1	1	1	6	124	13.0662	5.09717	1.21072	1.20713	1.20893	1.12386	1.2467	1.18528	0.980439	0.886716
E2RRN8	Uncharacterized protein OS=Canis lupus familiaris GN=VASN PE=4 SV=1 - [E2RRN8_CANLF]	7.14	1	4	4	11	672	71.4246	7.75244	1.17354	1.25648	1.21501	1.20491	1.17767	1.19129	0.980475	0.886944
E2RG01	Uncharacterized protein OS=Canis lupus familiaris GN=C7 PE=4 SV=2 - [E2RG01_CANLF]	44.73	1	32	32	142	863	94.8793	6.81494	0.99322	0.985476	0.989348	0.990709	1.02434	1.00752	1.01837	0.889461
F1PCE8	Uncharacterized protein OS=Canis lupus familiaris GN=LOC475521 PE=3 SV=1 - [F1PCE8_CANLF]	4.07	2	1	1	14	246	26.2609	8.07471	1.04666	1.01239	1.02953	0.946592	1.14988	1.04824	1.01817	0.890564
H9GWG4	Uncharacterized protein OS=Canis lupus familiaris GN=ITIH3 PE=4 SV=2 - [H9GWG4_CANLF]	29.21	2	21	21	176	890	99.6307	6.16357	1.02461	1.02501	1.02481	1.00551	1.00779	1.00665	0.982281	0.898187
E2RGB0	Uncharacterized protein OS=Canis lupus familiaris GN=APOC4 PE=4 SV=2 - [E2RGB0_CANLF]	20.66	1	2	2	12	121	13.728	8.646	0.961533	0.896062	0.928797	0.91453	0.973587	0.944058	1.01643	0.900198
F1P9M6	Uncharacterized protein OS=Canis lupus familiaris PE=4 SV=2 - [F1P9M6_CANLF]	14.14	1	1	1	7	99	10.6431	6.48096	1.11005	1.49909	1.30457	1.20328	1.3609	1.28209	0.982769	0.901222
J9P227	Uncharacterized protein OS=Canis lupus familiaris GN=KIAA1033 PE=4 SV=1 - [J9P227_CANLF]	0.85	5	2	2	12	1172	136.17	7.43018	1.03605	1.23718	1.13661	1.19667	1.11318	1.15493	1.01611	0.901972
E2RT65	Uncharacterized protein OS=Canis lupus familiaris GN=PGAM1 PE=3 SV=2 - [E2RT65_CANLF]	5.51	1	1	1	2	254	28.8038	7.18115	0.848779	0.923251	0.886015	0.916071	0.884152	0.900112	1.01591	0.903085
F1P7J4	Uncharacterized protein OS=Canis lupus familiaris GN=C5 PE=4 SV=2 - [F1P7J4_CANLF]	45.47	1	63	63	456	1689	188.548	6.59521	0.92601	0.937258	0.931634	0.94361	0.949156	0.946383	1.01583	0.903524
F1PLV6	Fibulin-1 OS=Canis lupus familiaris GN=FBLN1 PE=3 SV=2 - [F1PLV6_CANLF]	10.17	1	5	5	31	708	77.8814	5.2876	1.18304	1.1325	1.15777	1.14902	1.20199	1.17551	1.01532	0.906359
F1PN38	Uncharacterized protein OS=Canis lupus familiaris GN=BIRC6 PE=4 SV=2 - [F1PN38_CANLF]	0.13	1	1	1	3	4755	520.21	6.04932	0.76234	0.82278	0.79256	0.725538	0.833854	0.779696	0.983769	0.907451
E2R2J3	Uncharacterized protein OS=Canis lupus familiaris GN=WDR54 PE=4 SV=1 - [E2R2J3_CANLF]	2.69	1	1	1	3	334	35.6088	6.31592	0.861164	0.934291	0.897728	0.927883	0.894547	0.911215	1.01502	0.908011
E2RNL8	Uncharacterized protein OS=Canis lupus familiaris GN=APOD PE=3 SV=2 - [E2RNL8_CANLF]	28.78	2	7	7	62	205	23.1768	5.18604	0.991551	1.00008	0.995818	1.03182	0.928573	0.980194	0.984311	0.910823
F1P6R7	Uncharacterized protein OS=Canis lupus familiaris GN=GSTM4 PE=3 SV=2 - [F1P6R7_CANLF]	14.22	3	2	2	6	218	25.7492	7.47412	1.00094	0.989593	0.995268	1.03746	0.981936	1.0097	1.0145	0.910933
F1PW10	Uncharacterized protein OS=Canis lupus familiaris GN=TGFBI PE=4 SV=2 - [F1PW10_CANLF]	12.92	2	8	8	19	650	70.8175	6.53662	0.955072	1.05412	1.0046	1.00042	1.0379	1.01916	1.0145	0.910939
F1PKI5	Uncharacterized protein OS=Canis lupus familiaris PE=4 SV=2 - [F1PKI5_CANLF]	71.07	2	1	5	119	121	13.2666	6.62451	1.20744	0.799211	1.00333	0.957648	1.07798	1.01781	1.01444	0.911255
F1PAF3	Hepatocyte growth factor activator OS=Canis lupus familiaris GN=HGFAC PE=3 SV=1 - [F1PAF3_CANLF]	20.95	2	10	10	52	654	70.256	7.6499	1.08011	0.999729	1.03992	1.04466	1.06515	1.05491	1.01441	0.911403
E2RCC8	Uncharacterized protein OS=Canis lupus familiaris PE=4 SV=2 - [E2RCC8_CANLF]	52.22	2	19	22	1834	473	51.9588	7.34229	0.979249	1.00521	0.99223	0.974557	0.97908	0.976818	0.984468	0.9118
J9P1G2	Uncharacterized protein OS=Canis lupus familiaris GN=C1QB PE=4 SV=1 - [J9P1G2_CANLF]	15.2	1	4	4	28	250	26.2794	9.02686	0.95574	1.06542	1.01058	1.02844	0.961464	0.994954	0.984535	0.912219
J9P430	Uncharacterized protein OS=Canis lupus familiaris GN=TF PE=3 SV=1 - [J9P430_CANLF]	81.08	3	66	69	3213	756	83.3232	7.88428	0.921861	0.941272	0.931567	0.943157	0.946201	0.944679	1.01408	0.913288
F1PIC7	Uncharacterized protein OS=Canis lupus familiaris GN=HSPA5 PE=3 SV=2 - [F1PIC7_CANLF]	10.4	5	4	6	7	654	72.2385	5.16064	1.04017	1.0721	1.05613	0.972818	1.16909	1.07096	1.01403	0.913511
E2RNG3	Uncharacterized protein OS=Canis lupus familiaris GN=CPN1 PE=4 SV=1 - [E2RNG3_CANLF]	31.73	2	10	10	86	457	51.9062	7.13721	1.06449	1.05789	1.06119	1.10347	1.04701	1.07524	1.01324	0.917962
E2R2F7	Uncharacterized protein OS=Canis lupus familiaris GN=SHBG PE=4 SV=1 - [E2R2F7_CANLF]	42.22	1	12	12	75	405	43.978	6.07471	1.00993	1.00465	1.00729	1.00213	1.03861	1.02037	1.01298	0.91938
F1PIX8	Uncharacterized protein OS=Canis lupus familiaris GN=C3 PE=4 SV=2 - [F1PIX8_CANLF]	72.2	2	122	122	4504	1662	186.787	6.87354	0.967343	0.970157	0.96875	0.981449	0.980567	0.981008	1.01265	0.921212
J9P5F0	Uncharacterized protein OS=Canis lupus familiaris GN=CFD PE=3 SV=1 - [J9P5F0_CANLF]	41.38	1	9	9	35	261	27.9892	7.89893	1.09454	1.11765	1.10609	1.10938	1.13071	1.12005	1.01262	0.921421
P01874	Ig mu chain C region OS=Canis lupus familiaris PE=1 SV=1 - [IGHM_CANLF]	10	1	2	3	135	450	48.8646	6.12549	1.11323	1.03902	1.07612	1.10799	1.01503	1.06151	0.98642	0.923952
E2R833	Uncharacterized protein OS=Canis lupus familiaris GN=LRG1 PE=4 SV=2 - [E2R833_CANLF]	53.6	2	17	17	226	347	38.025	6.58057	0.850092	0.872219	0.861155	0.845318	0.854155	0.849737	0.98674	0.92594
F1PH86	Uncharacterized protein OS=Canis lupus familiaris GN=SERPINA3 PE=3 SV=2 - [F1PH86_CANLF]	54.39	2	19	20	303	421	47.1104	6.11279	0.781516	0.838499	0.810007	0.821319	0.81732	0.819319	1.0115	0.92768
J9PAD4	Uncharacterized protein OS=Canis lupus familiaris PE=4 SV=1 - [J9PAD4_CANLF]	36	2	1	3	73	125	13.0283	5.89697	1.12451	1.17166	1.14809	1.14957	1.17293	1.16125	1.01146	0.927855
E2RBD0	Serum amyloid A protein OS=Canis lupus familiaris GN=LOC476879 PE=3 SV=1 - [E2RBD0_CANLF]	20.77	2	1	3	17	130	14.4693	9.81787	0.466109	0.559356	0.512732	0.451339	0.585669	0.518504	1.01126	0.929014
E2QZQ1	Uncharacterized protein OS=Canis lupus familiaris GN=LOC477071 PE=3 SV=1 - [E2QZQ1_CANLF]	49.65	2	33	34	330	705	77.6691	6.88818	1.02726	0.962647	0.994954	1.00106	0.964102	0.982582	0.987565	0.931075
J9NTJ3	Uncharacterized protein OS=Canis lupus familiaris GN=MTCL1 PE=4 SV=1 - [J9NTJ3_CANLF]	0.71	4	1	1	8	985	109.853	6.53662	0.629855	1.00895	0.819401	0.680842	0.97547	0.828156	1.01068	0.932218
F1PYX9	Uncharacterized protein OS=Canis lupus familiaris GN=SERPING1 PE=3 SV=2 - [F1PYX9_CANLF]	21.97	1	11	11	146	487	53.4223	5.87158	0.933985	0.907106	0.920546	0.954703	0.905344	0.930023	1.0103	0.934398
F1PLT8	Sulfhydryl oxidase OS=Canis lupus familiaris GN=QSOX1 PE=4 SV=2 - [F1PLT8_CANLF]	43.06	1	24	24	160	713	79.0925	8.77783	0.970061	0.983006	0.976533	0.956477	0.97384	0.965158	0.988352	0.935964
Q28260	Vascular cell adhesion protein 1 OS=Canis lupus familiaris GN=VCAM1 PE=2 SV=1 - [VCAM1_CANLF]	15.83	2	10	10	19	739	81.3602	5.0083	1.0429	1.06111	1.05201	1.01117	1.11329	1.06223	1.00972	0.937649
P33703	Beta-2-glycoprotein 1 OS=Canis lupus familiaris GN=APOH PE=2 SV=1 - [APOH_CANLF]	56.23	1	19	19	242	345	38.3777	8.1333	0.980206	0.966998	0.973602	1.02337	0.942287	0.982828	1.00948	0.938991
J9NTL7	Uncharacterized protein OS=Canis lupus familiaris GN=LOC478952 PE=4 SV=1 - [J9NTL7_CANLF]	52.15	3	55	55	459	1233	139.641	6.49365	0.952855	0.938487	0.945671	0.946971	0.962279	0.954625	1.00947	0.93904
P25473	Clusterin OS=Canis lupus familiaris GN=CLU PE=2 SV=1 - [CLUS_CANLF]	33.93	2	19	19	350	445	51.7566	5.90967	0.953118	0.961669	0.957394	0.929293	0.965921	0.947607	0.989778	0.944832
J9P5I4	Uncharacterized protein OS=Canis lupus familiaris PE=4 SV=1 - [J9P5I4_CANLF]	7.97	1	1	1	9	138	15.3026	8.68994	1.13806	1.02724	1.08265	1.06481	1.07869	1.07175	0.989933	0.945793
F1PE28	Uncharacterized protein OS=Canis lupus familiaris GN=TKT PE=4 SV=2 - [F1PE28_CANLF]	18.58	1	9	9	23	576	63.1143	7.15186	1.01282	1.01044	1.01163	0.934873	1.10449	1.01968	1.00796	0.947532
F1PDJ0	Apolipoprotein C-III OS=Canis lupus familiaris GN=APOC3 PE=4 SV=1 - [F1PDJ0_CANLF]	35	2	4	4	114	100	10.9825	5.37646	0.929298	0.977617	0.953457	0.986346	0.93553	0.960938	1.00785	0.948148
F1PEM7	Uncharacterized protein OS=Canis lupus familiaris GN=IGFBP2 PE=4 SV=1 - [F1PEM7_CANLF]	17.81	1	4	4	14	247	27.0821	7.06396	1.16534	1.0989	1.13212	1.12362	1.11896	1.12129	0.990431	0.948885
F1PZR4	Hemopexin OS=Canis lupus familiaris GN=HPX PE=3 SV=2 - [F1PZR4_CANLF]	60.48	1	25	25	651	458	51.3053	7.31299	0.926723	0.930057	0.92839	0.940154	0.93077	0.935462	1.00762	0.949437
E2RJC2	Uncharacterized protein OS=Canis lupus familiaris GN=C1QC PE=4 SV=1 - [E2RJC2_CANLF]	25.31	1	5	5	24	245	25.6227	7.84033	0.906336	0.941672	0.924004	0.91404	0.947675	0.930858	1.00742	0.950562
E2R3V1	Uncharacterized protein OS=Canis lupus familiaris GN=FCRL4 PE=4 SV=1 - [E2R3V1_CANLF]	2.91	1	1	1	6	516	56.5599	7.15186	1.13256	1.13076	1.13166	1.18715	1.09261	1.13988	1.00727	0.951411
E2RKZ6	Uncharacterized protein OS=Canis lupus familiaris GN=PON3 PE=4 SV=1 - [E2RKZ6_CANLF]	7.06	1	2	2	3	354	39.6775	6.30322	0.947237	0.989028	0.968133	1.07219	0.877143	0.974665	1.00675	0.954338
J9NWG4	Uncharacterized protein OS=Canis lupus familiaris GN=LOC479260 PE=4 SV=1 - [J9NWG4_CANLF]	38.68	4	10	10	46	243	25.707	7.28369	0.927263	0.976085	0.951674	0.897871	1.01822	0.958047	1.0067	0.954616
F1PQ91	Uncharacterized protein OS=Canis lupus familiaris GN=IGFBP3 PE=4 SV=2 - [F1PQ91_CANLF]	15.46	1	5	5	13	291	31.0982	8.54346	1.12371	1.06721	1.09546	1.07493	1.1293	1.10211	1.00608	0.958113
F1PYU9	Keratin, type I cytoskeletal 10 OS=Canis lupus familiaris GN=KRT10 PE=3 SV=2 - [F1PYU9_CANLF]	23.24	20	9	12	44	568	57.6501	5.14795	1.19598	1.19688	1.19643	1.14821	1.22624	1.18723	0.992307	0.960537
E2RS80	Uncharacterized protein OS=Canis lupus familiaris GN=C2 PE=3 SV=2 - [E2RS80_CANLF]	55.36	2	40	64	698	1268	141.215	7.32764	0.944636	0.963053	0.953845	0.939808	0.953375	0.946591	0.992395	0.961086
F2Z4N7	Uncharacterized protein OS=Canis lupus familiaris GN=ACTC1 PE=3 SV=1 - [F2Z4N7_CANLF]	38.73	5	3	11	60	377	41.9919	5.38916	1.38395	1.06448	1.22422	1.20747	1.22245	1.21496	0.992436	0.961338
F1Q421	Plasminogen OS=Canis lupus familiaris GN=PLG PE=3 SV=2 - [F1Q421_CANLF]	58.37	7	34	41	505	812	91.1103	7.07861	0.940895	0.972567	0.956731	0.954266	0.967909	0.961088	1.00455	0.966708
O18840	Actin, cytoplasmic 1 OS=Canis lupus familiaris GN=ACTB PE=2 SV=3 - [ACTB_CANLF]	54.67	7	6	15	111	375	41.7097	5.47803	1.14459	1.12924	1.13692	1.18905	1.09361	1.14133	1.00388	0.970502
E2R886	Uncharacterized protein OS=Canis lupus familiaris GN=KNG1 PE=4 SV=2 - [E2R886_CANLF]	32.69	1	14	14	282	416	46.4897	6.91748	0.984128	1.04022	1.01217	1.01445	0.99953	1.00699	0.994876	0.976468
L7N0F2	Uncharacterized protein OS=Canis lupus familiaris PE=4 SV=1 - [L7N0F2_CANLF]	80.95	2	1	9	1415	126	13.2195	7.29834	1.17871	1.08053	1.12962	1.17879	1.08668	1.13274	1.00275	0.976881
Q28256	Platelet glycoprotein Ib alpha chain OS=Canis lupus familiaris GN=GP1BA PE=2 SV=2 - [GP1BA_CANLF]	7.24	1	5	5	18	677	74.0861	5.90967	0.989213	1.04397	1.01659	0.980368	1.0442	1.01228	0.995759	0.981932
J9P7F7	Uncharacterized protein OS=Canis lupus familiaris GN=LOC608247 PE=4 SV=1 - [J9P7F7_CANLF]	42.86	1	12	12	72	322	34.5098	7.03467	1.00003	1.00451	1.00227	0.982059	1.02608	1.00407	1.0018	0.982306
E2RAK7	Apolipoprotein A-II OS=Canis lupus familiaris GN=APOA2 PE=1 SV=2 - [APOA2_CANLF]	61	1	6	6	256	100	11.2179	6.65381	0.977529	0.988433	0.982981	0.988388	0.973469	0.980929	0.997912	0.995247
F1PB77	Alpha-1,4 glucan phosphorylase OS=Canis lupus familiaris GN=PYGL PE=3 SV=2 - [F1PB77_CANLF]	1.26	2	1	1	2	870	99.8503	7.2251	1.31069	1.08672	1.1987	1.2105	1.18522	1.19786	0.999295	0.996508
F2Z4Q6	Serum albumin OS=Canis lupus familiaris GN=ALB PE=4 SV=1 - [F2Z4Q6_CANLF]	90.63	4	5	80	12948	608	68.5619	5.69385	0.96721	0.981246	0.974228	0.981286	0.964047	0.972667	0.998398	0.998249
F1PIG0	Uncharacterized protein OS=Canis lupus familiaris GN=TGFBR3 PE=4 SV=2 - [F1PIG0_CANLF]	2.57	1	2	2	4	857	94.1563	5.79541	0.911584	0.917654	0.914619	0.853205	0.973174	0.91319	0.998437	0.998494
F1PKL6	Uncharacterized protein OS=Canis lupus familiaris PE=4 SV=2 - [F1PKL6_CANLF]	31.51	1	3	3	22	146	15.6575	5.10986	0.968427	1.11154	1.03998	1.0545	1.02272	1.03861	0.998681	1
PSMs, peptide spectrum matches; AAs, amino acids; MW, molecular weight; calc.pI, theoretical isoelectric point; REF, reference; OS, OrganismName; GN, GeneName; PE, protein existence; SV, SequenceVersion.

## Sheet: 2h vs 0h
Accession	Description	Coverage	Proteins	Unique Peptides	Peptides	PSMs	AAs	MW [kDa]	calc. pI	0 h-1/REF	0 h-2/REF	Average 0 h	2 h-1/REF	2 h-2/REF	Average 2 h	2 h/0 h	Significance A
J9NU17	Uncharacterized protein OS=Canis lupus familiaris GN=MYO1A PE=3 SV=1 - [J9NU17_CANLF]	1.08	2	1	1	2	927	105.725	9.5249	0.433907	0.510199	0.472053	2.8165	0.61485	1.71568	3.6345	7.83455e-29
F1PBL4	Fibrinogen alpha chain OS=Canis lupus familiaris GN=FGA PE=4 SV=1 - [F1PBL4_CANLF]	37.33	5	34	34	389	892	96.5827	6.1001	0.547022	0.567392	0.557207	1.49998	1.48392	1.49195	2.67755	1.85112e-17
F1PGS2	Fibrinogen beta chain OS=Canis lupus familiaris GN=FGB PE=4 SV=2 - [F1PGS2_CANLF]	70.47	2	29	29	274	491	55.8163	8.1626	0.564064	0.574771	0.569417	1.45893	1.4491	1.45401	2.55351	5.81654e-16
F1P8V6	Myoglobin OS=Canis lupus familiaris GN=MB PE=3 SV=1 - [F1P8V6_CANLF]	18.83	2	2	2	10	154	17.3261	7.78174	0.495684	0.687692	0.591688	1.53097	1.47591	1.50344	2.54093	8.24959e-16
J9NVE9	Serum amyloid A protein OS=Canis lupus familiaris GN=LOC102155886 PE=3 SV=1 - [J9NVE9_CANLF]	19.23	1	1	3	11	130	14.5032	9.23193	0.34888	0.503876	0.426378	0.706304	1.34272	1.02451	2.40283	3.79711e-14
P60529	Hemoglobin subunit alpha OS=Canis lupus familiaris GN=HBA PE=1 SV=1 - [HBA_CANLF]	92.2	3	1	11	608	141	15.2079	8.06006	0.436232	0.405718	0.420975	0.971113	1.02288	0.996996	2.36831	9.85933e-14
J9JHF7	Uncharacterized protein OS=Canis lupus familiaris GN=LOC100855540 PE=3 SV=1 - [J9JHF7_CANLF]	91.55	2	1	11	464	142	15.3689	8.06006	0.326931	0.4609	0.393916	0.90264	0.938549	0.920595	2.33703	2.33664e-13
P60524	Hemoglobin subunit beta OS=Canis lupus familiaris GN=HBB PE=1 SV=1 - [HBB_CANLF]	92.47	5	5	16	746	146	15.9864	8.04541	0.486537	0.462007	0.474272	1.10396	1.09059	1.09728	2.3136	4.45608e-13
F1P8G0	Fibrinogen gamma chain OS=Canis lupus familiaris GN=FGG PE=4 SV=2 - [F1P8G0_CANLF]	59.5	2	25	25	306	437	49.2859	6.12549	0.639198	0.600235	0.619716	1.40782	1.37319	1.3905	2.24377	3.03188e-12
F1P8A6	Uncharacterized protein OS=Canis lupus familiaris GN=VSIG4 PE=4 SV=2 - [F1P8A6_CANLF]	8.27	2	2	2	11	399	44.4324	6.82959	0.596898	0.690112	0.643505	1.41683	1.46837	1.4426	2.24178	3.20182e-12
F1PGC3	Uncharacterized protein OS=Canis lupus familiaris GN=IFIT2 PE=4 SV=2 - [F1PGC3_CANLF]	3.63	3	2	2	11	468	54.0843	7.47412	0.375061	0.362432	0.368747	0.733769	0.820497	0.777133	2.1075	1.23428e-10
F1PDY8	Uncharacterized protein OS=Canis lupus familiaris GN=CA2 PE=4 SV=2 - [F1PDY8_CANLF]	33.08	1	8	8	30	260	29.2417	7.18115	0.539863	0.588748	0.564305	1.16692	1.09363	1.13027	2.00295	2.02755e-09
E2RP87	Uncharacterized protein OS=Canis lupus familiaris GN=LOC478984 PE=4 SV=1 - [E2RP87_CANLF]	3.21	1	1	1	2	249	27.9924	9.15869	0.61879	0.696009	0.657399	1.3146	1.1991	1.25685	1.91186	2.2244e-08
J9P0D4	Uncharacterized protein OS=Canis lupus familiaris GN=IGKV2D-26 PE=4 SV=1 - [J9P0D4_CANLF]	14.89	1	2	3	38	141	15.5068	8.30908	0.811025	0.748331	0.779678	1.84443	0.946733	1.39558	1.78994	5.04809e-07
F1Q0C1	Uncharacterized protein OS=Canis lupus familiaris GN=DOPEY1 PE=4 SV=2 - [F1Q0C1_CANLF]	0.41	2	1	1	3	2455	275.66	6.30322	0.73667	0.600845	0.668757	1.14926	1.19168	1.17047	1.75022	1.36106e-06
F1PPB6	Uncharacterized protein OS=Canis lupus familiaris GN=DERA PE=4 SV=2 - [F1PPB6_CANLF]	4.4	1	1	1	2	318	35.2327	8.95361	0.858713	0.965281	0.911997	1.36049	1.7009	1.53069	1.6784	7.86867e-06
F5XVB0	von Willebrand factor OS=Canis lupus familiaris GN=VWF PE=2 SV=1 - [F5XVB0_CANLF]	2.67	3	5	5	15	2813	309.482	5.5415	0.702006	0.88269	0.792348	1.1546	1.29368	1.22414	1.54495	0.000174601
E2QW34	Proteasome subunit beta type OS=Canis lupus familiaris GN=PSMB2 PE=3 SV=1 - [E2QW34_CANLF]	5.47	1	1	1	3	201	22.7666	6.68311	0.564277	0.604285	0.584281	0.856537	0.942325	0.899431	1.53938	0.000197673
F1PCG4	Uncharacterized protein OS=Canis lupus familiaris GN=PRDX2 PE=4 SV=2 - [F1PCG4_CANLF]	33.33	1	5	6	23	198	21.8841	5.42725	0.8086	0.66979	0.739195	1.12535	1.14	1.13268	1.53231	0.000231202
J9JHZ3	Uncharacterized protein OS=Canis lupus familiaris GN=LOC476825 PE=3 SV=1 - [J9JHZ3_CANLF]	72.37	4	3	14	612	152	16.7166	8.01611	0.70899	0.656428	0.682709	1.01505	1.05206	1.03356	1.51391	0.000346442
J9NTJ3	Uncharacterized protein OS=Canis lupus familiaris GN=MTCL1 PE=4 SV=1 - [J9NTJ3_CANLF]	0.71	4	1	1	8	985	109.853	6.53662	0.629855	1.00895	0.819401	1.23384	1.11395	1.1739	1.43263	0.00192719
E2RI99	Signal transducer and activator of transcription OS=Canis lupus familiaris GN=STAT1 PE=3 SV=2 - [E2RI99_CANLF]	0.93	2	1	1	18	750	87.2265	6.12549	0.705884	0.978796	0.84234	1.21973	1.13537	1.17755	1.39795	0.00385727
F1PBK6	Uncharacterized protein OS=Canis lupus familiaris GN=CA1 PE=4 SV=2 - [F1PBK6_CANLF]	18.39	1	3	3	15	261	28.9765	7.12256	0.669214	0.79843	0.733822	1.08791	0.957992	1.02295	1.394	0.00416797
E2RIG8	Uncharacterized protein OS=Canis lupus familiaris GN=ARL5B PE=3 SV=2 - [E2RIG8_CANLF]	4.44	1	1	1	3	180	20.4923	6.52197	0.903749	0.835576	0.869663	1.16729	1.2283	1.19779	1.37731	0.0057604
C0LQL0	Protein S100 OS=Canis lupus familiaris GN=S100A8 PE=2 SV=1 - [C0LQL0_CANLF]	20.22	2	2	2	3	89	10.3683	5.45264	0.746347	0.726703	0.736525	1.06711	0.961317	1.01421	1.37702	0.00579216
F1P865	Uncharacterized protein OS=Canis lupus familiaris GN=SFXN4 PE=4 SV=2 - [F1P865_CANLF]	6.11	1	1	1	2	311	35.5138	9.39307	0.407826	1.35218	0.880004	0.919099	1.44931	1.1842	1.34568	0.0104537
F1PN38	Uncharacterized protein OS=Canis lupus familiaris GN=BIRC6 PE=4 SV=2 - [F1PN38_CANLF]	0.13	1	1	1	3	4755	520.21	6.04932	0.76234	0.82278	0.79256	1.05221	0.983315	1.01776	1.28415	0.0310675
E2RL75	Uncharacterized protein OS=Canis lupus familiaris GN=INTS4 PE=4 SV=1 - [E2RL75_CANLF]	1.24	1	1	1	3	964	108.197	6.49365	0.858958	1.12405	0.991504	1.18396	1.26486	1.22441	1.2349	0.0389929
E2RH23	Uncharacterized protein OS=Canis lupus familiaris GN=BRPF1 PE=4 SV=1 - [E2RH23_CANLF]	1.07	1	1	1	9	1220	138.089	7.73779	1.26757	1.32638	1.29697	0.411274	0.377168	0.394221	0.303954	5.41602e-18
J9PB81	Uncharacterized protein OS=Canis lupus familiaris GN=CTSG PE=3 SV=1 - [J9PB81_CANLF]	4.86	1	1	1	2	247	27.2892	11.7808	1.58057	1.52043	1.5505	0.764817	0.727229	0.746023	0.48115	1.08687e-07
E2QUY2	Uncharacterized protein OS=Canis lupus familiaris GN=ABRACL PE=4 SV=1 - [E2QUY2_CANLF]	16.05	1	1	1	3	81	9.05486	6.29053	1.24124	1.52428	1.38276	0.706106	0.657701	0.681903	0.493147	2.85374e-07
J9NYN2	Uncharacterized protein OS=Canis lupus familiaris GN=CSRP1 PE=4 SV=1 - [J9NYN2_CANLF]	7.77	1	1	1	2	193	20.6188	8.57275	1.61807	1.70062	1.65935	0.946505	0.890156	0.91833	0.553429	1.73868e-05
F6X870	Uncharacterized protein OS=Canis lupus familiaris GN=PAM PE=4 SV=1 - [F6X870_CANLF]	4.09	2	2	2	3	807	89.4679	6.21436	1.31355	1.38042	1.34699	1.01708	0.740602	0.878841	0.652449	0.00192399
F1P9M6	Uncharacterized protein OS=Canis lupus familiaris PE=4 SV=2 - [F1P9M6_CANLF]	14.14	1	1	1	7	99	10.6431	6.48096	1.11005	1.49909	1.30457	0.853311	0.891846	0.872578	0.668864	0.00348426
F1P6P2	Transgelin OS=Canis lupus familiaris GN=TAGLN2 PE=3 SV=2 - [F1P6P2_CANLF]	17.09	1	3	3	5	199	22.3632	8.25049	1.29554	1.60013	1.44783	1.06573	0.919836	0.992783	0.685702	0.00612467
E2R5H4	Uncharacterized protein OS=Canis lupus familiaris GN=ILK PE=4 SV=1 - [E2R5H4_CANLF]	5.31	1	2	2	3	452	51.3559	8.07471	1.39794	1.40917	1.40356	0.941346	0.995384	0.968365	0.689936	0.00701021
J9NWQ5	Uncharacterized protein OS=Canis lupus familiaris PE=4 SV=1 - [J9NWQ5_CANLF]	18.06	5	2	2	4	144	16.2065	4.28467	1.25528	1.4574	1.35634	0.77353	1.10088	0.937203	0.69098	0.00724454
F1PF31	Uncharacterized protein OS=Canis lupus familiaris GN=TNC PE=4 SV=1 - [F1PF31_CANLF]	1.57	2	3	3	9	2233	243.686	5.0083	1.15262	1.00725	1.07994	0.70705	0.800803	0.753926	0.69812	0.00903315
P02677	Fibrinogen beta chain (Fragment) OS=Canis lupus familiaris GN=FGB PE=1 SV=2 - [FIBB_CANLF]	35.48	1	1	1	19	31	3.72878	4.99561	0.816976	1.13539	0.976184	0.642682	0.744879	0.693781	0.710707	0.0130963
Q9MZD3	Peptidyl-prolyl cis-trans isomerase (Fragment) OS=Canis lupus familiaris PE=2 SV=1 - [Q9MZD3_CANLF]	12.82	8	2	2	7	156	16.9224	8.1626	1.31323	1.31599	1.31461	0.993585	0.898268	0.945927	0.719548	0.0167828
J9P716	Uncharacterized protein OS=Canis lupus familiaris GN=TUBB1 PE=3 SV=1 - [J9P716_CANLF]	4.87	2	1	2	4	596	65.2055	5.78271	1.2059	1.18577	1.19583	0.918878	0.804342	0.86161	0.720511	0.0172315
Q0QEN2	ATP synthase subunit beta (Fragment) OS=Canis lupus familiaris GN=ATP5B PE=2 SV=1 - [Q0QEN2_CANLF]	7.17	2	2	2	3	321	34.6651	5.41455	1.25023	1.72826	1.48924	0.962113	1.20012	1.08112	0.725951	0.0199571
J9P6T6	Uncharacterized protein OS=Canis lupus familiaris GN=MEIG1 PE=4 SV=1 - [J9P6T6_CANLF]	11.36	1	1	1	3	88	10.8054	9.24658	1.15175	1.17776	1.16476	0.905462	0.79022	0.847841	0.727913	0.0210233
E2RI13	Uncharacterized protein OS=Canis lupus familiaris GN=GPBP1 PE=4 SV=2 - [E2RI13_CANLF]	3.96	2	1	1	2	480	54.1474	6.90283	1.4907	1.16281	1.32675	0.999754	0.934468	0.967111	0.728931	0.0215947
J9NZW6	Uncharacterized protein OS=Canis lupus familiaris GN=APOF PE=4 SV=1 - [J9NZW6_CANLF]	6.94	1	1	1	2	288	31.5762	6.20166	1.2848	1.72853	1.50667	1.19017	1.03327	1.11172	0.737864	0.0271717
F1PTS8	Uncharacterized protein OS=Canis lupus familiaris GN=KRT6A PE=3 SV=1 - [F1PTS8_CANLF]	12.08	21	3	7	24	571	60.6331	8.1626	1.16989	1.24052	1.2052	0.883667	0.896654	0.890161	0.738598	0.0276773
F1Q432	Uncharacterized protein OS=Canis lupus familiaris GN=TNXB PE=4 SV=2 - [F1Q432_CANLF]	0.46	2	2	2	3	3874	418.736	5.50342	1.34917	1.18586	1.26752	0.908985	0.972003	0.940494	0.741997	0.030119
E2RRU2	Uncharacterized protein OS=Canis lupus familiaris GN=SMPDL3A PE=4 SV=2 - [E2RRU2_CANLF]	18.91	2	5	5	14	349	40.2722	6.65381	1.02362	1.05638	1.04	0.753052	0.796551	0.774801	0.744998	0.0324175
J9NVT1	Uncharacterized protein OS=Canis lupus familiaris GN=UBC PE=4 SV=1 - [J9NVT1_CANLF]	23.62	5	2	2	4	381	42.8251	7.57666	1.15655	1.13785	1.1472	0.949354	0.780177	0.864766	0.753805	0.0399798
F1PBI6	Uncharacterized protein OS=Canis lupus familiaris GN=THBS1 PE=4 SV=2 - [F1PBI6_CANLF]	17.18	6	18	18	55	1170	129.53	4.98291	1.186	1.20715	1.19658	0.899436	0.90518	0.902308	0.754075	0.0402324
P52784	ATP-dependent 6-phosphofructokinase, muscle type OS=Canis lupus familiaris GN=PFKM PE=2 SV=2 - [PFKAM_CANLF]	2.17	2	1	1	2	782	85.5066	8.08936	0.729736	1.33088	1.03031	0.576893	0.977566	0.77723	0.754367	0.0405059
F1PE38	Uncharacterized protein OS=Canis lupus familiaris GN=CDH13 PE=4 SV=2 - [F1PE38_CANLF]	6.09	1	2	2	4	608	66.4348	4.95752	1.11162	1.17849	1.14506	0.803129	0.926809	0.864969	0.755393	0.0414815
E2RB38	Uncharacterized protein OS=Canis lupus familiaris GN=TPM3 PE=3 SV=2 - [E2RB38_CANLF]	4.03	10	1	1	2	248	28.8527	4.75439	1.39698	1.4085	1.40274	1.0417	1.079	1.06035	0.755914	0.0419838
E2QSF4	Uncharacterized protein OS=Canis lupus familiaris GN=TUBB PE=3 SV=1 - [E2QSF4_CANLF]	7.21	6	1	2	4	444	49.639	4.89404	1.29803	1.20326	1.25064	0.912054	0.993803	0.952928	0.761951	0.0481584
P81709	Lysozyme C, spleen isozyme OS=Canis lupus familiaris PE=1 SV=1 - [LYSC2_CANLF]	18.46	2	2	2	4	130	14.5692	8.80713	0.826029	0.795513	0.810771	1.03862	0.996169	1.0174	1.25485	0.0503637
F1PQN5	Uncharacterized protein OS=Canis lupus familiaris GN=CFL1 PE=3 SV=2 - [F1PQN5_CANLF]	30.72	5	3	3	10	166	18.4877	8.08936	1.22411	1.30923	1.26667	0.910574	1.02558	0.968079	0.76427	0.0507115
J9P0V6	Uncharacterized protein OS=Canis lupus familiaris PE=4 SV=1 - [J9P0V6_CANLF]	31.91	1	2	3	43	141	14.8793	8.08936	1.06802	1.09435	1.08119	0.890287	0.767326	0.828806	0.766572	0.0533479
E2QW61	Uncharacterized protein OS=Canis lupus familiaris GN=LBP PE=4 SV=2 - [E2QW61_CANLF]	14.98	1	5	5	18	247	27.1504	8.646	0.734685	0.726291	0.730488	0.61139	0.509684	0.560537	0.767346	0.0542584
F1PCE8	Uncharacterized protein OS=Canis lupus familiaris GN=LOC475521 PE=3 SV=1 - [F1PCE8_CANLF]	4.07	2	1	1	14	246	26.2609	8.07471	1.04666	1.01239	1.02953	0.842879	0.74179	0.792335	0.76961	0.0569887
J9P992	Uncharacterized protein OS=Canis lupus familiaris GN=MYO18A PE=3 SV=1 - [J9P992_CANLF]	0.72	2	1	1	2	1945	219.253	6.15088	1.24395	1.40998	1.32696	1.743	1.55842	1.65071	1.24397	0.0598796
F1PYU9	Keratin, type I cytoskeletal 10 OS=Canis lupus familiaris GN=KRT10 PE=3 SV=2 - [F1PYU9_CANLF]	23.24	20	9	12	44	568	57.6501	5.14795	1.19598	1.19688	1.19643	0.936064	0.914895	0.925479	0.773534	0.0619732
F1PSJ5	Uncharacterized protein OS=Canis lupus familiaris PE=4 SV=2 - [F1PSJ5_CANLF]	73.96	1	2	4	292	96	10.4701	8.47021	1.08543	1.20663	1.14603	0.907397	0.872255	0.889826	0.77644	0.0658742
F1PZR2	Uncharacterized protein OS=Canis lupus familiaris GN=WRN PE=4 SV=2 - [F1PZR2_CANLF]	0.52	1	1	1	2	1336	152.094	6.59521	0.688987	0.629243	0.659115	0.530692	0.495527	0.51311	0.778483	0.0687255
L7N0J8	Uncharacterized protein OS=Canis lupus familiaris PE=4 SV=1 - [L7N0J8_CANLF]	1.62	1	1	1	4	678	76.0069	9.61279	1.11644	0.679166	0.897806	1.21326	1.00427	1.10877	1.23498	0.0689141
J9P5V6	Uncharacterized protein OS=Canis lupus familiaris GN=TLN1 PE=4 SV=1 - [J9P5V6_CANLF]	6.23	2	9	9	17	2425	257.416	6.56592	1.1593	1.47972	1.31951	1.01986	1.05806	1.03896	0.787384	0.0822602
J9P8M2	Fibronectin OS=Canis lupus familiaris GN=FN1 PE=4 SV=1 - [J9P8M2_CANLF]	52.48	1	3	83	895	2256	248.986	6.13818	1.43402	1.48415	1.45908	1.16426	1.143	1.15363	0.790651	0.0876966
J9NXX1	Uncharacterized protein OS=Canis lupus familiaris GN=ZBED8 PE=4 SV=1 - [J9NXX1_CANLF]	1.01	3	1	1	3	594	68.0356	6.41748	0.849819	0.87168	0.86075	0.999377	1.09802	1.0487	1.21835	0.0887664
E2RL35	Phospholipase A2 OS=Canis lupus familiaris GN=PLA2G4F PE=4 SV=1 - [E2RL35_CANLF]	1.41	1	1	1	3	850	95.2711	5.36377	1.08105	1.10849	1.09477	0.762754	0.975042	0.868898	0.793679	0.0929684
E2RJY0	Uncharacterized protein OS=Canis lupus familiaris GN=KCTD12 PE=4 SV=1 - [E2RJY0_CANLF]	8.26	1	2	2	4	327	35.8438	5.64307	0.999291	0.694599	0.846945	0.989394	1.05237	1.02088	1.20537	0.107529
J9P2L7	Uncharacterized protein OS=Canis lupus familiaris PE=4 SV=1 - [J9P2L7_CANLF]	7.86	1	1	1	3	140	14.8362	7.07861	0.807902	1.26082	1.03436	0.808829	0.852478	0.830653	0.803059	0.110781
J9NWJ5	Thioredoxin OS=Canis lupus familiaris GN=TXN PE=3 SV=1 - [J9NWJ5_CANLF]	23.76	2	2	2	3	101	11.3796	5.21143	1.26668	0.936147	1.10141	0.866684	0.906867	0.886775	0.805126	0.115016
H9GWI3	Uncharacterized protein OS=Canis lupus familiaris GN=AHNAK2 PE=4 SV=2 - [H9GWI3_CANLF]	10.46	2	3	3	5	1415	147.607	6.27783	1.09514	0.959369	1.02725	1.42521	1.03555	1.23038	1.19774	0.120055
F1PB77	Alpha-1,4 glucan phosphorylase OS=Canis lupus familiaris GN=PYGL PE=3 SV=2 - [F1PB77_CANLF]	1.26	2	1	1	2	870	99.8503	7.2251	1.31069	1.08672	1.1987	1.44674	1.42339	1.43506	1.19718	0.121018
E2RA70	C-C motif chemokine OS=Canis lupus familiaris GN=CCL16 PE=3 SV=2 - [E2RA70_CANLF]	23.14	2	2	2	2	121	13.9026	10.0962	1.38701	1.1217	1.25436	1.05851	0.97333	1.01592	0.809912	0.125268
F1PS41	Uncharacterized protein OS=Canis lupus familiaris GN=IPO9 PE=4 SV=2 - [F1PS41_CANLF]	1.61	1	1	1	2	991	111.135	4.85596	1.38894	1.29119	1.34007	1.01473	1.16257	1.08865	0.812385	0.130811
F1PC59	Uncharacterized protein OS=Canis lupus familiaris GN=PRDX6 PE=4 SV=1 - [F1PC59_CANLF]	10.86	1	2	2	3	221	24.6559	6.01123	0.661688	1.13484	0.898265	0.824077	1.3133	1.06869	1.18973	0.134501
E2RNJ1	Uncharacterized protein OS=Canis lupus familiaris GN=LAMP2 PE=4 SV=2 - [E2RNJ1_CANLF]	5.11	2	2	2	8	411	45.1065	6.66846	0.975777	0.899607	0.937692	1.11433	1.11238	1.11336	1.18734	0.139081
E2QX17	Proteasome subunit beta type OS=Canis lupus familiaris GN=PSMB3 PE=3 SV=1 - [E2QX17_CANLF]	20	2	3	3	6	205	22.9635	6.55127	0.951151	0.788128	0.869639	1.0119	1.05144	1.03167	1.18632	0.141069
J9NT12	Uncharacterized protein OS=Canis lupus familiaris GN=FGL1 PE=4 SV=1 - [J9NT12_CANLF]	10.03	1	3	3	3	309	35.9454	5.97314	0.787744	0.843017	0.815381	0.996038	0.936122	0.96608	1.18482	0.144045
E2RMN2	Proteasome subunit alpha type OS=Canis lupus familiaris GN=PSMA6 PE=3 SV=1 - [E2RMN2_CANLF]	29.27	1	6	6	16	246	27.3678	6.75635	0.794303	0.770096	0.782199	0.936388	0.913163	0.924776	1.18228	0.149211
J9NYC5	Uncharacterized protein OS=Canis lupus familiaris GN=CAECAM1 PE=4 SV=1 - [J9NYC5_CANLF]	10.49	16	4	4	14	429	46.8312	6.78564	0.884401	0.873385	0.878893	1.04314	1.03339	1.03827	1.18134	0.151155
F1PB85	Uncharacterized protein OS=Canis lupus familiaris GN=SERPINA7 PE=3 SV=2 - [F1PB85_CANLF]	33.57	2	12	12	65	414	46.5041	7.04932	0.825873	0.878685	0.852279	1.00155	1.01198	1.00676	1.18126	0.151321
F1PP21	Uncharacterized protein OS=Canis lupus familiaris GN=ISL1 PE=4 SV=2 - [F1PP21_CANLF]	2.78	1	1	1	2	360	40.26	8.36768	1.20657	1.14051	1.17354	1.03356	0.893838	0.9637	0.821189	0.151942
F2Z4N7	Uncharacterized protein OS=Canis lupus familiaris GN=ACTC1 PE=3 SV=1 - [F2Z4N7_CANLF]	38.73	5	3	11	60	377	41.9919	5.38916	1.38395	1.06448	1.22422	1.00984	1.01514	1.01249	0.827049	0.167246
J9PAA1	Uncharacterized protein OS=Canis lupus familiaris PE=3 SV=1 - [J9PAA1_CANLF]	21.81	12	4	4	14	243	27.3726	4.83057	1.21486	1.20817	1.21152	0.932959	1.07349	1.00322	0.828072	0.170019
A0A077LQA5	Alpha-tubulin OS=Canis lupus familiaris GN=TUBA1A PE=2 SV=1 - [A0A077LQA5_CANLF]	8.2	9	3	3	5	451	50.1036	5.05908	1.24158	1.14399	1.19279	0.938891	1.03687	0.987882	0.828213	0.170405
J9P669	Uncharacterized protein OS=Canis lupus familiaris GN=CDH5 PE=4 SV=1 - [J9P669_CANLF]	8.29	2	5	5	8	772	86.2344	5.2876	1.10053	1.16737	1.13395	0.913526	0.966019	0.939772	0.82876	0.171904
E2R302	Uncharacterized protein OS=Canis lupus familiaris GN=ERAP1 PE=4 SV=1 - [E2R302_CANLF]	2.76	1	3	3	3	942	107.196	5.68115	1.22096	1.17836	1.19966	0.958084	1.04777	1.00293	0.83601	0.192603
J9P849	Proteasome subunit alpha type OS=Canis lupus familiaris GN=PSMA3 PE=3 SV=1 - [J9P849_CANLF]	21.14	2	5	5	12	246	27.3688	7.37158	0.965814	0.894427	0.93012	1.0682	1.09537	1.08179	1.16306	0.193325
F1PYL6	Uncharacterized protein OS=Canis lupus familiaris GN=FCMR PE=4 SV=2 - [F1PYL6_CANLF]	2.68	1	1	1	2	410	45.4214	9.26123	1.20515	0.937543	1.07134	1.25417	1.23638	1.24527	1.16235	0.195152
F6Y5M8	Uncharacterized protein OS=Canis lupus familiaris GN=LOC100856725 PE=4 SV=1 - [F6Y5M8_CANLF]	4.09	1	1	1	2	171	19.0208	6.52197	0.445658	0.462032	0.453845	0.561586	0.491935	0.526761	1.16066	0.199507
L7N0F1	Uncharacterized protein OS=Canis lupus familiaris GN=LOC100687054 PE=4 SV=1 - [L7N0F1_CANLF]	35.85	1	1	7	853	212	22.2162	8.73389	1.11755	1.19885	1.1582	1.35622	1.33061	1.34341	1.15991	0.201467
L7N0E8	Uncharacterized protein OS=Canis lupus familiaris PE=4 SV=1 - [L7N0E8_CANLF]	39.84	1	3	5	41	123	13.8135	4.93213	0.892921	0.896086	0.894503	1.03337	1.03718	1.03527	1.15737	0.208226
F1PVR0	Uncharacterized protein OS=Canis lupus familiaris GN=MMP8 PE=3 SV=2 - [F1PVR0_CANLF]	4.2	1	2	2	8	476	54.237	6.34131	0.73298	0.700962	0.716971	0.876771	0.781025	0.828898	1.15611	0.211653
F1Q462	Superoxide dismutase [Cu-Zn] OS=Canis lupus familiaris GN=SOD1 PE=3 SV=2 - [F1Q462_CANLF]	14.67	2	2	2	3	150	15.5527	6.52197	0.971118	0.919142	0.94513	1.10278	1.08069	1.09174	1.15512	0.214382
F1P6H6	Uncharacterized protein OS=Canis lupus familiaris GN=CCDC96 PE=4 SV=2 - [F1P6H6_CANLF]	1.72	1	1	1	3	348	41.0333	7.2251	1.11653	0.955347	1.03594	0.75186	0.998047	0.874953	0.844599	0.219168
E2RFB7	Amine oxidase OS=Canis lupus familiaris GN=AOC3 PE=3 SV=2 - [E2RFB7_CANLF]	8.78	4	7	7	30	763	84.1922	6.3667	1.16966	1.10502	1.13734	0.948925	0.97744	0.963183	0.84687	0.226564
E2R997	Uncharacterized protein OS=Canis lupus familiaris GN=PBLD PE=4 SV=2 - [E2R997_CANLF]	2.75	2	1	1	3	255	28.2147	7.10791	0.787609	0.715136	0.751372	0.884942	0.843056	0.863999	1.14989	0.229185
C4MW55	Cytochrome c oxidase subunit 2 OS=Canis lupus familiaris GN=COX2 PE=3 SV=1 - [C4MW55_CANLF]	4.41	1	1	1	5	227	26.0561	4.729	1.14985	1.34714	1.2485	0.794186	1.32263	1.05841	0.847746	0.229456
E2R0T6	Uncharacterized protein OS=Canis lupus familiaris GN=HSPA8 PE=3 SV=1 - [E2R0T6_CANLF]	8.82	7	2	4	5	646	70.8542	5.51611	1.28381	1.1225	1.20316	1.11264	0.928341	1.02049	0.848177	0.23089
F1PYZ1	Uncharacterized protein OS=Canis lupus familiaris GN=LOC485255 PE=3 SV=2 - [F1PYZ1_CANLF]	14.09	1	1	2	54	149	16.6116	7.1958	0.648158	0.677591	0.662875	0.581731	0.94174	0.761736	1.14914	0.231389
J9P9B9	Uncharacterized protein OS=Canis lupus familiaris PE=4 SV=1 - [J9P9B9_CANLF]	19.05	1	1	2	43	126	13.5476	6.75635	0.728308	0.693958	0.711133	0.897745	0.733002	0.815374	1.14658	0.238972
E2R2C3	Glucose-6-phosphate isomerase OS=Canis lupus familiaris GN=GPI PE=3 SV=1 - [E2R2C3_CANLF]	11.47	1	5	5	11	558	62.7981	7.92822	0.866209	0.767817	0.817013	0.614471	0.775901	0.695186	0.850887	0.240025
J9NWG4	Uncharacterized protein OS=Canis lupus familiaris GN=LOC479260 PE=4 SV=1 - [J9NWG4_CANLF]	38.68	4	10	10	46	243	25.707	7.28369	0.927263	0.976085	0.951674	1.07491	1.10417	1.08954	1.14486	0.244183
E2R913	Uncharacterized protein OS=Canis lupus familiaris GN=CARHSP1 PE=4 SV=1 - [E2R913_CANLF]	10.39	1	1	1	3	154	16.6054	8.20654	0.858198	1.03499	0.946593	0.812341	1.35301	1.08268	1.14376	0.247571
F6Y4Y7	Uncharacterized protein OS=Canis lupus familiaris GN=TMF1 PE=4 SV=1 - [F6Y4Y7_CANLF]	0.55	1	1	1	2	1095	123.369	5.021	0.549896	1.15208	0.850986	0.809301	0.642688	0.725995	0.853121	0.247723
F1P6H7	Fibronectin OS=Canis lupus familiaris GN=FN1 PE=4 SV=2 - [F1P6H7_CANLF]	48.15	2	1	81	864	2426	267.073	5.5542	1.72099	1.35801	1.5395	1.57388	1.0549	1.31439	0.853779	0.250017
E2R8Z5	Uncharacterized protein OS=Canis lupus familiaris GN=KRT5 PE=3 SV=2 - [E2R8Z5_CANLF]	11.74	19	2	7	28	596	62.6911	7.72314	1.11893	1.04275	1.08084	0.921647	0.927734	0.924691	0.855528	0.256182
E2R6Z2	Uncharacterized protein OS=Canis lupus familiaris GN=PTPRS PE=4 SV=2 - [E2R6Z2_CANLF]	1.09	1	1	1	2	1921	210.505	7.76709	1.44242	1.20081	1.32161	1.0393	1.22218	1.13074	0.855574	0.256349
Q8MJD1	Neutrophil elastase OS=Canis lupus familiaris GN=ELANE PE=2 SV=1 - [Q8MJD1_CANLF]	4.96	1	1	1	4	282	29.9016	10.6528	1.08113	0.963163	1.02215	1.17967	1.15271	1.16619	1.14092	0.25646
J9NUF2	Uncharacterized protein OS=Canis lupus familiaris GN=FLT4 PE=3 SV=1 - [J9NUF2_CANLF]	5.16	2	5	5	11	1336	149.641	6.37939	1.22266	1.05215	1.1374	0.958722	0.988796	0.973759	0.856124	0.258306
E2RC23	Uncharacterized protein OS=Canis lupus familiaris GN=PCOLCE PE=4 SV=1 - [E2RC23_CANLF]	8.08	1	2	2	2	458	48.5552	7.09326	1.05287	1.52104	1.28695	0.960982	1.24404	1.10251	0.856682	0.260302
J9PB28	Uncharacterized protein OS=Canis lupus familiaris GN=FGL2 PE=4 SV=1 - [J9PB28_CANLF]	8.62	1	4	4	11	441	48.977	7.03467	1.03428	1.04728	1.04078	0.886003	0.898952	0.892477	0.857507	0.263272
Q6EIZ1	Keratin, type II cytoskeletal 2 epidermal OS=Canis lupus familiaris GN=KRT2 PE=2 SV=1 - [K22E_CANLF]	7.58	11	3	5	16	633	64.5264	7.73779	1.2069	1.03565	1.12127	1.04983	0.879043	0.964438	0.860128	0.272839
J9P5Z0	Myosin-1 OS=Canis lupus familiaris GN=MYH1 PE=4 SV=1 - [J9P5Z0_CANLF]	0.78	9	1	1	3	773	89.9375	5.52881	0.737265	0.972825	0.855045	0.759981	0.711545	0.735763	0.860496	0.2742
P12278	Apolipoprotein C-II OS=Canis lupus familiaris GN=APOC2 PE=1 SV=1 - [APOC2_CANLF]	41.58	2	6	6	92	101	11.2196	4.88135	0.848836	0.867527	0.858181	0.978097	0.969985	0.974041	1.13501	0.275756
F1Q2N0	Uncharacterized protein OS=Canis lupus familiaris GN=PCLO PE=4 SV=2 - [F1Q2N0_CANLF]	0.18	1	1	1	6	4881	529.201	6.29053	1.1176	1.12066	1.11913	1.29229	1.24722	1.26976	1.13459	0.277144
F1PS30	alpha-1,2-Mannosidase OS=Canis lupus familiaris GN=MAN1A1 PE=3 SV=1 - [F1PS30_CANLF]	9.59	2	4	4	7	584	66.0596	6.37939	1.32819	1.22199	1.27509	1.10791	1.08877	1.09834	0.86138	0.277482
F1Q0N9	Uncharacterized protein OS=Canis lupus familiaris GN=KRT19 PE=3 SV=1 - [F1Q0N9_CANLF]	8.52	25	2	5	9	399	43.8582	5.26221	0.73386	0.582668	0.658264	0.723281	0.769505	0.746393	1.13388	0.279549
J9NU05	Uncharacterized protein OS=Canis lupus familiaris GN=LDHB PE=3 SV=1 - [J9NU05_CANLF]	11.48	7	2	4	7	331	36.2048	6.17627	0.909527	0.681484	0.795505	0.565302	0.807898	0.6866	0.863099	0.283931
E2RMF9	Uncharacterized protein OS=Canis lupus familiaris GN=SERPINA5 PE=3 SV=1 - [E2RMF9_CANLF]	35.38	1	11	11	59	407	45.7925	8.44092	0.905961	0.910659	0.90831	1.02751	1.02342	1.02547	1.12899	0.296499
E2QVU9	Uncharacterized protein OS=Canis lupus familiaris GN=BLVRB PE=4 SV=1 - [E2QVU9_CANLF]	26.7	1	3	3	4	206	22.0653	7.59131	0.997431	0.970925	0.984178	0.696284	1.01112	0.853704	0.867429	0.300567
F1PQU0	Uncharacterized protein OS=Canis lupus familiaris PE=4 SV=2 - [F1PQU0_CANLF]	32.14	1	2	3	53	140	14.8592	7.79639	1.12576	1.14971	1.13773	1.27954	1.28572	1.28263	1.12736	0.302312
F1PIF2	Uncharacterized protein OS=Canis lupus familiaris GN=CTSZ PE=3 SV=2 - [F1PIF2_CANLF]	3.83	1	1	1	2	261	29.2696	6.26514	0.830488	0.880355	0.855422	0.936155	0.992305	0.96423	1.1272	0.302878
J9P227	Uncharacterized protein OS=Canis lupus familiaris GN=KIAA1033 PE=4 SV=1 - [J9P227_CANLF]	0.85	5	2	2	12	1172	136.17	7.43018	1.03605	1.23718	1.13661	0.981831	0.992948	0.987389	0.868712	0.305602
F6XKC0	Uncharacterized protein OS=Canis lupus familiaris GN=C8G PE=3 SV=1 - [F6XKC0_CANLF]	34.65	2	5	5	24	202	22.5297	8.67529	1.13389	1.10777	1.12083	1.00002	0.947914	0.973964	0.868969	0.306617
F6X5M3	Uncharacterized protein OS=Canis lupus familiaris GN=CLTB PE=4 SV=1 - [F6X5M3_CANLF]	3.93	1	1	1	6	229	25.1452	4.64014	0.332605	0.5499	0.441252	0.35518	0.637726	0.496453	1.1251	0.310494
Q38J75	Coagulation factor VII OS=Canis lupus familiaris PE=2 SV=1 - [Q38J75_CANLF]	18.83	3	8	8	14	446	49.684	5.61768	0.866708	0.870253	0.868481	0.946743	1.00479	0.975767	1.12353	0.316271
J9P455	Uncharacterized protein OS=Canis lupus familiaris PE=4 SV=1 - [J9P455_CANLF]	38.1	5	1	4	88	126	13.5708	8.55811	0.992728	0.871493	0.93211	1.01024	1.08396	1.0471	1.12337	0.316895
F1PR54	Uncharacterized protein OS=Canis lupus familiaris GN=LTF PE=3 SV=1 - [F1PR54_CANLF]	38.84	4	23	25	177	708	77.2458	8.23584	0.850074	0.808269	0.829172	0.957159	0.905581	0.93137	1.12325	0.317311
F1PN98	Uncharacterized protein OS=Canis lupus familiaris GN=F5 PE=3 SV=2 - [F1PN98_CANLF]	16.38	2	31	31	99	2222	251.715	5.77002	1.13684	1.12273	1.12979	0.986998	0.982556	0.984777	0.871649	0.317311
F1PEN6	Transferrin receptor protein 1 OS=Canis lupus familiaris GN=TFRC PE=2 SV=1 - [F1PEN6_CANLF]	29.35	3	22	22	142	770	86.5324	6.30322	0.898209	0.90078	0.899494	1.01914	1.0009	1.01002	1.12288	0.318718
F1PUB5	Uncharacterized protein OS=Canis lupus familiaris GN=PSMA7 PE=4 SV=2 - [F1PUB5_CANLF]	27.4	3	3	5	6	219	24.5661	8.70459	1.04832	1.07865	1.06349	0.901492	0.958575	0.930034	0.874514	0.328969
L7N0J5	Uncharacterized protein OS=Canis lupus familiaris PE=4 SV=1 - [L7N0J5_CANLF]	14.71	1	2	2	8	170	17.903	8.48486	1.05064	1.20525	1.12795	1.03575	0.938227	0.986986	0.87503	0.331095
J9P6T3	Uncharacterized protein OS=Canis lupus familiaris GN=PLTP PE=4 SV=1 - [J9P6T3_CANLF]	29.49	2	9	9	31	495	54.6636	7.21045	1.15335	1.20761	1.18048	1.02807	1.03843	1.03325	0.875277	0.332116
E2RFV9	Uncharacterized protein OS=Canis lupus familiaris GN=C9 PE=4 SV=2 - [E2RFV9_CANLF]	32.37	2	17	17	104	553	62.0976	5.35107	0.917774	0.916371	0.917072	1.03369	1.0193	1.0265	1.11932	0.332204
F1P8T3	Uncharacterized protein OS=Canis lupus familiaris GN=SEMA7A PE=4 SV=2 - [F1P8T3_CANLF]	3.57	1	1	1	2	561	63.6262	6.75635	0.934692	0.963303	0.948997	1.0347	1.0887	1.0617	1.11876	0.334357
F1PV45	Uncharacterized protein OS=Canis lupus familiaris GN=TTN PE=4 SV=2 - [F1PV45_CANLF]	0.03	1	1	1	2	35180	3904.61	6.354	1.09401	0.80772	0.950865	0.9658	1.16057	1.06318	1.11812	0.336826
P56595	Apolipoprotein C-I OS=Canis lupus familiaris GN=APOC1 PE=1 SV=1 - [APOC1_CANLF]	31.82	1	6	6	123	88	9.73531	9.40771	0.969883	0.981804	0.975843	1.10927	1.07161	1.09044	1.11743	0.339509
F6V8B5	Uncharacterized protein OS=Canis lupus familiaris PE=4 SV=1 - [F6V8B5_CANLF]	33.82	2	3	3	28	136	14.529	7.97217	0.997272	1.10229	1.04978	0.843824	0.999913	0.921869	0.878155	0.344124
F1PCE5	Uncharacterized protein OS=Canis lupus familiaris GN=SERPINA1 PE=3 SV=2 - [F1PCE5_CANLF]	39.62	3	3	19	742	419	46.733	6.17627	1.24891	1.14644	1.19767	1.03489	1.07003	1.05246	0.878755	0.34666
J9NYI6	Uncharacterized protein OS=Canis lupus familiaris GN=LRRIQ1 PE=4 SV=1 - [J9NYI6_CANLF]	0.59	1	1	1	3	1689	196.218	6.31592	0.4441	0.643647	0.543874	0.548909	0.663826	0.606367	1.1149	0.349498
F1PYF5	Matrix metalloproteinase-9 OS=Canis lupus familiaris GN=MMP9 PE=3 SV=2 - [F1PYF5_CANLF]	13.49	6	8	8	15	704	78.1621	5.63037	0.871104	0.804875	0.837989	0.91373	0.952245	0.932988	1.11336	0.355682
F1PCB5	Aminopeptidase N OS=Canis lupus familiaris GN=ANPEP PE=4 SV=2 - [F1PCB5_CANLF]	2.56	1	2	2	2	975	110.188	6.17627	0.830708	1.06133	0.946019	1.10432	1.00067	1.05249	1.11255	0.358989
E2RKQ6	Uncharacterized protein OS=Canis lupus familiaris GN=LGALS3BP PE=4 SV=1 - [E2RKQ6_CANLF]	15.21	1	6	6	15	559	62.1708	5.31299	0.869251	0.921617	0.895434	0.984513	1.00568	0.995096	1.1113	0.364094
F1PF02	Proteasome subunit beta type OS=Canis lupus familiaris GN=PSMB1 PE=3 SV=2 - [F1PF02_CANLF]	12.7	1	2	2	4	189	20.4531	7.88428	0.889774	0.948256	0.919015	0.78891	0.834103	0.811507	0.883018	0.364948
E2R4H4	Uncharacterized protein OS=Canis lupus familiaris GN=PSMA5 PE=4 SV=2 - [E2R4H4_CANLF]	26.78	1	3	3	12	183	20.0219	4.729	1.33806	1.33858	1.33832	1.06781	1.29913	1.18347	0.884297	0.370534
Q6TN20	Cathelicidin OS=Canis lupus familiaris GN=CAMP PE=2 SV=1 - [Q6TN20_CANLF]	31.4	1	5	5	11	172	19.4252	8.42627	0.904242	1.14329	1.02377	1.05581	1.21538	1.13559	1.10923	0.372664
E2RGB0	Uncharacterized protein OS=Canis lupus familiaris GN=APOC4 PE=4 SV=2 - [E2RGB0_CANLF]	20.66	1	2	2	12	121	13.728	8.646	0.961533	0.896062	0.928797	1.04364	1.01562	1.02963	1.10856	0.375453
B5LX43	Factor XI OS=Canis lupus familiaris PE=2 SV=1 - [B5LX43_CANLF]	12.18	2	6	7	15	624	69.7483	8.14795	1.01415	0.957251	0.985699	1.12736	1.05483	1.0911	1.10693	0.382363
F1PEN8	Carboxylic ester hydrolase OS=Canis lupus familiaris GN=BCHE PE=3 SV=1 - [F1PEN8_CANLF]	9.14	1	4	4	7	602	68.4747	7.63525	1.24117	0.875724	1.05845	0.893453	0.984963	0.939208	0.887346	0.384031
F1P832	Alpha-1,4 glucan phosphorylase OS=Canis lupus familiaris GN=PYGM PE=3 SV=2 - [F1P832_CANLF]	2.14	1	1	1	2	842	97.1468	7.10791	0.891853	0.914712	0.903282	0.768136	0.835749	0.801942	0.887809	0.386101
H9GW55	Uncharacterized protein OS=Canis lupus familiaris GN=PGAM2 PE=3 SV=1 - [H9GW55_CANLF]	4.74	1	1	1	2	253	28.5917	8.73389	0.824117	0.716835	0.770476	0.844013	0.856322	0.850167	1.10343	0.397431
P05123	Creatine kinase M-type OS=Canis lupus familiaris GN=CKM PE=1 SV=3 - [KCRM_CANLF]	51.71	2	14	14	62	381	43.1259	7.25439	0.577081	0.511617	0.544349	0.655094	0.545418	0.600256	1.1027	0.400613
F1PAA4	Cadherin-1 OS=Canis lupus familiaris GN=CDH1 PE=4 SV=2 - [F1PAA4_CANLF]	4.35	2	2	2	5	827	91.4279	4.729	1.06895	0.995601	1.03228	0.856635	0.984976	0.920806	0.892016	0.405176
J9PBN6	Uncharacterized protein OS=Canis lupus familiaris GN=LOC611458 PE=4 SV=1 - [J9PBN6_CANLF]	60.76	1	4	79	1490	1478	165.846	6.62451	1.17563	1.38766	1.28164	1.10829	1.18045	1.14437	0.89289	0.409198
F1PNY4	Keratinocyte differentiation-associated protein OS=Canis lupus familiaris GN=KRTDAP PE=4 SV=2 - [F1PNY4_CANLF]	31.63	3	2	2	6	98	10.8588	9.5249	1.38157	1.37321	1.37739	1.24979	1.21035	1.23007	0.893048	0.409928
L7N0N6	Alpha-amylase OS=Canis lupus familiaris GN=AMY2B PE=3 SV=1 - [L7N0N6_CANLF]	37.42	4	11	11	47	449	51.3139	7.62061	0.97462	0.965958	0.970289	1.04555	1.0899	1.06773	1.10042	0.410727
E2R1N7	Uncharacterized protein OS=Canis lupus familiaris GN=PCYOX1 PE=4 SV=1 - [E2R1N7_CANLF]	16.24	1	6	6	11	505	56.6687	6.53662	1.09788	1.12521	1.11154	1.0026	0.985333	0.993964	0.894219	0.415354
J9NTU0	Uncharacterized protein OS=Canis lupus familiaris PE=3 SV=1 - [J9NTU0_CANLF]	3.43	6	1	1	2	321	34.6293	7.81104	0.96462	0.995441	0.98003	1.14375	1.00847	1.07611	1.09804	0.421455
E2RA67	C-C motif chemokine OS=Canis lupus familiaris GN=CCL14 PE=3 SV=1 - [E2RA67_CANLF]	21.88	1	2	2	21	96	11.0075	8.104	1.03408	1.05396	1.04402	0.954373	0.916781	0.935577	0.896129	0.424275
L7N0F2	Uncharacterized protein OS=Canis lupus familiaris PE=4 SV=1 - [L7N0F2_CANLF]	80.95	2	1	9	1415	126	13.2195	7.29834	1.17871	1.08053	1.12962	1.24891	1.22998	1.23944	1.09722	0.425199
F1PA63	Uncharacterized protein OS=Canis lupus familiaris GN=LCAT PE=4 SV=1 - [F1PA63_CANLF]	11.42	1	3	3	9	438	49.704	6.16357	0.932314	1.15979	1.04605	0.961769	0.915208	0.938488	0.897173	0.429188
E2RN74	Uncharacterized protein OS=Canis lupus familiaris GN=CPB2 PE=4 SV=1 - [E2RN74_CANLF]	14.66	1	6	6	19	423	49.0527	7.78174	0.915786	1.15654	1.03616	0.905631	0.956477	0.931054	0.898562	0.435769
A1ILJ0	Alpha 1 antitrypsin OS=Canis lupus familiaris PE=2 SV=1 - [A1ILJ0_CANLF]	40	3	1	17	776	415	46.2767	5.89697	0.926171	0.98379	0.954981	1.03267	1.05851	1.04559	1.09488	0.435973
E2R2J3	Uncharacterized protein OS=Canis lupus familiaris GN=WDR54 PE=4 SV=1 - [E2R2J3_CANLF]	2.69	1	1	1	3	334	35.6088	6.31592	0.861164	0.934291	0.897728	0.759272	1.2065	0.982886	1.09486	0.43606
J9P590	Uncharacterized protein OS=Canis lupus familiaris PE=4 SV=1 - [J9P590_CANLF]	50	1	3	3	14	136	14.392	5.8208	0.949987	0.781818	0.865902	1.0337	0.862187	0.947944	1.09475	0.436584
F1P8Z5	Uncharacterized protein OS=Canis lupus familiaris GN=APOB PE=4 SV=1 - [F1P8Z5_CANLF]	48.86	5	186	186	1133	4425	501.222	6.88818	1.02191	1.02956	1.02573	0.925842	0.918611	0.922227	0.899089	0.438279
E7BUP9	Proteasome subunit beta type OS=Canis lupus familiaris GN=PSMB7 PE=2 SV=1 - [E7BUP9_CANLF]	3.61	3	1	1	2	277	29.9932	7.6792	1.03477	0.942145	0.988457	1.1411	1.02069	1.08089	1.09352	0.442335
F1PLV6	Fibulin-1 OS=Canis lupus familiaris GN=FBLN1 PE=3 SV=2 - [F1PLV6_CANLF]	10.17	1	5	5	31	708	77.8814	5.2876	1.18304	1.1325	1.15777	1.03022	1.05383	1.04202	0.900028	0.442767
F1PEM7	Uncharacterized protein OS=Canis lupus familiaris GN=IGFBP2 PE=4 SV=1 - [F1PEM7_CANLF]	17.81	1	4	4	14	247	27.0821	7.06396	1.16534	1.0989	1.13212	1.00098	1.03947	1.02023	0.901163	0.44822
F1PTY1	Keratin, type II cytoskeletal 1 OS=Canis lupus familiaris GN=KRT1 PE=3 SV=1 - [F1PTY1_CANLF]	13.73	2	7	9	34	619	63.675	7.84033	0.922809	0.923421	0.923115	0.82648	0.837814	0.832147	0.901456	0.449633
F1PQ91	Uncharacterized protein OS=Canis lupus familiaris GN=IGFBP3 PE=4 SV=2 - [F1PQ91_CANLF]	15.46	1	5	5	13	291	31.0982	8.54346	1.12371	1.06721	1.09546	0.975412	1.0005	0.987954	0.901865	0.451609
D2K841	C-X-C motif chemokine OS=Canis lupus familiaris PE=2 SV=1 - [D2K841_CANLF]	27.12	2	2	2	12	118	12.9219	9.18799	0.949969	0.96785	0.958909	0.908481	0.821934	0.865208	0.902283	0.453633
J9PAQ5	Protein S100 OS=Canis lupus familiaris GN=S100A12 PE=3 SV=1 - [J9PAQ5_CANLF]	27.17	2	2	2	4	92	10.4984	6.06201	0.720614	0.57727	0.648942	0.822655	0.591671	0.707163	1.08972	0.460395
J9JHN3	Uncharacterized protein OS=Canis lupus familiaris PE=4 SV=1 - [J9JHN3_CANLF]	50.38	1	3	5	61	133	14.5132	8.33838	1.03466	1.09695	1.06581	0.986306	0.941559	0.963933	0.904417	0.464029
E2R8C5	Uncharacterized protein OS=Canis lupus familiaris GN=IGLV2-33 PE=4 SV=2 - [E2R8C5_CANLF]	12.9	1	1	1	6	124	13.0662	5.09717	1.21072	1.20713	1.20893	1.1785	1.45251	1.31551	1.08816	0.467926
F1PY40	Uncharacterized protein OS=Canis lupus familiaris GN=CFI PE=4 SV=2 - [F1PY40_CANLF]	29.9	1	2	16	101	612	68.5111	7.72314	1.11644	1.18986	1.15315	1.05863	1.03016	1.0444	0.905692	0.470288
F1PEH9	Uncharacterized protein OS=Canis lupus familiaris GN=ACSL4 PE=4 SV=2 - [F1PEH9_CANLF]	1.04	1	1	1	2	670	74.3769	8.01611	1.05872	0.989984	1.02435	1.14327	1.08379	1.11353	1.08706	0.473315
E2QYB2	Uncharacterized protein OS=Canis lupus familiaris PE=4 SV=2 - [E2QYB2_CANLF]	45.95	8	1	5	112	111	12.0179	5.99854	0.694794	0.597506	0.64615	0.529451	0.642112	0.585782	0.906572	0.474634
F1PCE2	Uncharacterized protein OS=Canis lupus familiaris GN=EXTL2 PE=4 SV=2 - [F1PCE2_CANLF]	8.23	2	2	2	4	316	35.9837	9.27588	0.990786	0.999973	0.995379	1.04984	1.11242	1.08113	1.08615	0.477775
J9NS29	Cystatin OS=Canis lupus familiaris GN=LOC607874 PE=3 SV=1 - [J9NS29_CANLF]	18.95	1	1	1	4	153	16.3785	9.31982	1.34016	1.49845	1.4193	1.23298	1.34441	1.2887	0.907978	0.48161
J9NX46	Uncharacterized protein OS=Canis lupus familiaris GN=GLIPR2 PE=3 SV=1 - [J9NX46_CANLF]	16.99	1	2	2	3	153	17.1396	9.51025	1.10619	1.15653	1.13136	1.06168	0.993773	1.02773	0.9084	0.483714
P81546	Metalloproteinase inhibitor 1 OS=Canis lupus familiaris GN=TIMP1 PE=1 SV=2 - [TIMP1_CANLF]	8.7	3	2	2	7	207	22.8373	8.44092	0.911737	1.12729	1.01951	0.865468	0.987625	0.926547	0.908812	0.485768
F1PYX9	Uncharacterized protein OS=Canis lupus familiaris GN=SERPING1 PE=3 SV=2 - [F1PYX9_CANLF]	21.97	1	11	11	146	487	53.4223	5.87158	0.933985	0.907106	0.920546	1.00203	0.99257	0.997299	1.08338	0.491575
J9PB14	Uncharacterized protein OS=Canis lupus familiaris GN=BTD PE=4 SV=1 - [J9PB14_CANLF]	28.76	2	14	14	66	532	59.4723	6.03662	1.07054	1.04474	1.05764	0.947792	0.977876	0.962834	0.91036	0.493527
F1PH83	Uncharacterized protein OS=Canis lupus familiaris GN=COG7 PE=4 SV=2 - [F1PH83_CANLF]	1.46	2	1	1	18	687	77.2246	5.10986	1.22111	1.40482	1.31296	1.10419	1.28637	1.19528	0.91037	0.49358
F6UMP8	Uncharacterized protein OS=Canis lupus familiaris GN=LOC611458 PE=4 SV=1 - [F6UMP8_CANLF]	57.33	1	1	76	1434	1481	166.198	6.65381	1.23039	1.2385	1.23445	1.33578	1.33644	1.33611	1.08235	0.496727
J9P4B4	Uncharacterized protein OS=Canis lupus familiaris GN=C1QA PE=4 SV=1 - [J9P4B4_CANLF]	14.77	1	2	2	6	264	27.7669	8.82178	1.24766	1.30178	1.27472	1.2362	1.08826	1.16223	0.91175	0.500545
J9P5S6	Uncharacterized protein OS=Canis lupus familiaris GN=LOC490399 PE=4 SV=1 - [J9P5S6_CANLF]	16.87	2	7	7	26	498	54.0562	5.5542	0.822155	0.933128	0.877642	0.957716	0.939783	0.94875	1.08102	0.503491
E2RNG3	Uncharacterized protein OS=Canis lupus familiaris GN=CPN1 PE=4 SV=1 - [E2RNG3_CANLF]	31.73	2	10	10	86	457	51.9062	7.13721	1.06449	1.05789	1.06119	0.979546	0.956917	0.968232	0.912402	0.503845
F1PMS8	Uncharacterized protein OS=Canis lupus familiaris GN=NCAM1 PE=4 SV=2 - [F1PMS8_CANLF]	14.1	6	7	7	7	709	78.3852	4.94482	1.31727	0.91563	1.11645	1.08624	0.952929	1.01959	0.913238	0.508097
E2R2K4	Uncharacterized protein OS=Canis lupus familiaris GN=RAP1B PE=4 SV=1 - [E2R2K4_CANLF]	6.52	2	1	1	2	184	20.8256	5.78271	1.15899	1.11483	1.13691	1.04613	1.03401	1.04007	0.91482	0.516179
E2R109	Uncharacterized protein OS=Canis lupus familiaris GN=C8A PE=4 SV=1 - [E2R109_CANLF]	25.3	1	13	13	60	589	66.1596	6.93213	0.988273	0.955134	0.971703	1.05846	1.03757	1.04801	1.07853	0.516273
E2QV08	Malate dehydrogenase OS=Canis lupus familiaris GN=MDH1 PE=3 SV=2 - [E2QV08_CANLF]	18.97	2	6	6	19	348	38.222	7.94287	0.764302	0.682132	0.723217	0.777987	0.781405	0.779696	1.07809	0.518547
F1P6E1	Uncharacterized protein OS=Canis lupus familiaris GN=C1S PE=3 SV=2 - [F1P6E1_CANLF]	35.68	1	22	23	206	695	77.4802	4.93213	1.02287	0.991458	1.00716	1.0959	1.07174	1.08382	1.07611	0.528897
F1PUM6	Uncharacterized protein OS=Canis lupus familiaris GN=VTN PE=4 SV=1 - [F1PUM6_CANLF]	23.4	2	10	10	90	470	53.672	5.14795	1.0762	1.04965	1.06293	0.980676	0.972619	0.976647	0.918829	0.536895
J9NZT2	Uncharacterized protein OS=Canis lupus familiaris PE=4 SV=1 - [J9NZT2_CANLF]	52	1	4	5	98	125	13.4857	8.80713	1.05507	1.21169	1.13338	0.949851	1.13574	1.04279	0.920074	0.543393
E2RRN8	Uncharacterized protein OS=Canis lupus familiaris GN=VASN PE=4 SV=1 - [E2RRN8_CANLF]	7.14	1	4	4	11	672	71.4246	7.75244	1.17354	1.25648	1.21501	1.17031	1.06802	1.11917	0.921118	0.548867
F1PL50	Uncharacterized protein OS=Canis lupus familiaris PE=4 SV=2 - [F1PL50_CANLF]	24.08	1	2	2	25	191	20.2628	6.06201	1.26222	1.15212	1.20717	1.10707	1.11752	1.1123	0.921413	0.550414
F1Q4D9	Uncharacterized protein OS=Canis lupus familiaris GN=RBP4 PE=3 SV=1 - [F1Q4D9_CANLF]	72.51	3	13	13	122	211	23.8176	5.71924	0.948622	0.949899	0.94926	1.0277	1.0073	1.0175	1.07189	0.551353
J9NST4	Uncharacterized protein OS=Canis lupus familiaris GN=SEPP1 PE=4 SV=1 - [J9NST4_CANLF]	9.2	1	3	3	18	163	19.0712	6.69775	0.998808	0.944655	0.971732	0.993885	1.08693	1.04041	1.07067	0.557921
F1PAF3	Hepatocyte growth factor activator OS=Canis lupus familiaris GN=HGFAC PE=3 SV=1 - [F1PAF3_CANLF]	20.95	2	10	10	52	654	70.256	7.6499	1.08011	0.999729	1.03992	0.984627	0.936448	0.960538	0.923665	0.562299
Q6JDI3	Plasminogen (Fragment) OS=Canis lupus familiaris GN=PLG PE=4 SV=1 - [Q6JDI3_CANLF]	20.37	1	1	1	3	54	5.86178	5.10986	1.06727	0.911593	0.989432	0.931021	0.898367	0.914694	0.924463	0.566536
E2REU6	Uncharacterized protein OS=Canis lupus familiaris GN=KRT18 PE=3 SV=2 - [E2REU6_CANLF]	3.58	13	1	2	3	447	49.7624	5.52881	0.835018	0.810355	0.822686	0.866922	0.891288	0.879105	1.06858	0.569351
F1PP29	Uncharacterized protein OS=Canis lupus familiaris GN=IGHE PE=4 SV=1 - [F1PP29_CANLF]	17.05	1	6	6	14	440	48.6272	7.43018	1.11534	1.06649	1.09092	1.12212	0.896347	1.00923	0.925123	0.570046
E2QWN7	Uncharacterized protein OS=Canis lupus familiaris GN=LCP1 PE=4 SV=1 - [E2QWN7_CANLF]	30.62	3	16	16	42	627	70.1848	5.32568	0.890296	0.940635	0.915465	0.977256	0.977424	0.97734	1.06759	0.574797
J9P7Q8	Carboxylic ester hydrolase OS=Canis lupus familiaris GN=CEL PE=3 SV=1 - [J9P7Q8_CANLF]	20.22	2	12	12	47	643	69.925	6.31592	0.954145	1.04604	1.00009	1.08804	1.04691	1.06748	1.06738	0.575954
F1PGD4	Uncharacterized protein OS=Canis lupus familiaris GN=NELL2 PE=4 SV=2 - [F1PGD4_CANLF]	4.78	1	3	3	8	816	91.1594	5.77002	1.14266	1.02221	1.08243	0.996285	1.01118	1.00373	0.927291	0.581635
F1Q117	Uncharacterized protein OS=Canis lupus familiaris GN=ATRN PE=4 SV=2 - [F1Q117_CANLF]	9.6	2	13	13	29	1417	156.901	7.38623	0.865307	0.831865	0.848586	0.952193	0.85748	0.904837	1.06629	0.581995
E2QZ98	Uncharacterized protein OS=Canis lupus familiaris GN=ANGPTL3 PE=4 SV=1 - [E2QZ98_CANLF]	8.06	2	4	4	6	459	53.7903	6.99072	1.0867	1.21965	1.15318	1.01529	1.1243	1.06979	0.927691	0.58378
Q3HTU6	Interleukin 18 binding protein OS=Canis lupus familiaris PE=2 SV=1 - [Q3HTU6_CANLF]	10.26	2	1	1	2	117	12.9935	6.91748	0.854018	0.795567	0.824792	0.786564	0.74814	0.767352	0.930358	0.598166
J9NUI6	Uncharacterized protein OS=Canis lupus familiaris GN=AMBP PE=4 SV=1 - [J9NUI6_CANLF]	41.55	2	11	11	71	349	38.8317	6.354	1.1838	1.17761	1.18071	1.12873	1.06972	1.09923	0.930991	0.601596
F1PDJ0	Apolipoprotein C-III OS=Canis lupus familiaris GN=APOC3 PE=4 SV=1 - [F1PDJ0_CANLF]	35	2	4	4	114	100	10.9825	5.37646	0.929298	0.977617	0.953457	1.02215	1.00421	1.01318	1.06264	0.602474
E2RLN1	Uncharacterized protein OS=Canis lupus familiaris GN=SERPIND1 PE=3 SV=1 - [E2RLN1_CANLF]	47.18	2	22	22	232	496	56.6357	6.26514	0.893591	0.921293	0.907442	0.965305	0.963103	0.964204	1.06255	0.602953
F1P6R7	Uncharacterized protein OS=Canis lupus familiaris GN=GSTM4 PE=3 SV=2 - [F1P6R7_CANLF]	14.22	3	2	2	6	218	25.7492	7.47412	1.00094	0.989593	0.995268	1.15573	0.95891	1.05732	1.06235	0.604102
J9P5F0	Uncharacterized protein OS=Canis lupus familiaris GN=CFD PE=3 SV=1 - [J9P5F0_CANLF]	41.38	1	9	9	35	261	27.9892	7.89893	1.09454	1.11765	1.10609	1.01259	1.04956	1.03107	0.932172	0.60802
E2RBD0	Serum amyloid A protein OS=Canis lupus familiaris GN=LOC476879 PE=3 SV=1 - [E2RBD0_CANLF]	20.77	2	1	3	17	130	14.4693	9.81787	0.466109	0.559356	0.512732	0.471895	0.484848	0.478372	0.932985	0.612449
F1PSX2	Uncharacterized protein OS=Canis lupus familiaris PE=4 SV=2 - [F1PSX2_CANLF]	96.23	3	1	9	1483	106	11.1575	7.86963	1.18711	1.13413	1.16062	1.23143	1.22985	1.23064	1.06033	0.615592
F6UVK4	Uncharacterized protein OS=Canis lupus familiaris GN=ENPP2 PE=4 SV=1 - [F6UVK4_CANLF]	5.18	1	4	4	9	888	101.897	7.51807	1.07301	0.89703	0.985021	1.06284	1.02555	1.0442	1.06007	0.61708
E2RGT6	Uncharacterized protein OS=Canis lupus familiaris GN=C6 PE=4 SV=2 - [E2RGT6_CANLF]	39.74	1	34	34	181	936	105.466	6.43018	0.986447	0.956412	0.97143	1.03009	1.02884	1.02946	1.05974	0.618987
Q95J95	Adiponectin (Fragment) OS=Canis lupus familiaris GN=APM1 PE=2 SV=1 - [Q95J95_CANLF]	31.44	3	5	5	101	194	20.8765	8.00146	0.989125	0.983233	0.986179	0.907848	0.93482	0.921334	0.934246	0.619345
F1Q184	Uncharacterized protein OS=Canis lupus familiaris PE=4 SV=2 - [F1Q184_CANLF]	24.26	1	5	5	101	202	21.6856	6.34131	0.932444	0.967711	0.950077	0.901372	0.874001	0.887687	0.934331	0.619811
J9NYY8	Uncharacterized protein OS=Canis lupus familiaris PE=4 SV=1 - [J9NYY8_CANLF]	73.2	1	2	4	300	97	10.5642	7.95752	0.896264	0.919801	0.908033	0.874466	0.823461	0.848964	0.934948	0.623196
F1P903	Uncharacterized protein OS=Canis lupus familiaris GN=C1R PE=3 SV=2 - [F1P903_CANLF]	41.13	5	27	27	166	705	80.0791	6.23975	0.893727	0.922994	0.908361	0.954151	0.969133	0.961642	1.05866	0.62524
F1PKB2	Alpha-mannosidase OS=Canis lupus familiaris GN=MAN2B1 PE=3 SV=2 - [F1PKB2_CANLF]	8.54	1	7	7	17	1007	113.05	7.66455	0.980787	1.10179	1.04129	1.01783	0.930066	0.973948	0.935328	0.62528
L7N0P9	Uncharacterized protein OS=Canis lupus familiaris PE=4 SV=1 - [L7N0P9_CANLF]	43.65	4	2	5	98	126	13.5887	7.98682	0.978597	1.02834	1.00347	1.02826	0.851126	0.939691	0.936445	0.631427
E2REV6	Uncharacterized protein OS=Canis lupus familiaris GN=PTPRG PE=4 SV=2 - [E2REV6_CANLF]	2.15	2	2	2	2	1301	144.829	6.23975	1.15226	1.0545	1.10338	1.02945	1.03751	1.03348	0.936647	0.63254
E2QXH0	Uncharacterized protein OS=Canis lupus familiaris GN=PLA1A PE=3 SV=2 - [E2QXH0_CANLF]	4.82	1	1	1	3	456	50.1087	7.73779	1.16902	1.44736	1.30819	1.12472	1.32657	1.22564	0.9369	0.633933
F1PPZ2	Ribonuclease A B1 OS=Canis lupus familiaris GN=RNASE4 PE=3 SV=2 - [F1PPZ2_CANLF]	8.97	1	1	1	6	145	16.5272	9.0415	0.98439	1.00067	0.992533	0.887781	0.974619	0.9312	0.938206	0.641153
J9NRR0	Uncharacterized protein OS=Canis lupus familiaris GN=CREG1 PE=4 SV=1 - [J9NRR0_CANLF]	9.68	2	1	1	2	217	23.5734	7.54736	1.05807	0.964765	1.01142	0.93723	1.19864	1.06794	1.05588	0.6414
Q28260	Vascular cell adhesion protein 1 OS=Canis lupus familiaris GN=VCAM1 PE=2 SV=1 - [VCAM1_CANLF]	15.83	2	10	10	19	739	81.3602	5.0083	1.0429	1.06111	1.05201	1.16525	1.05508	1.11017	1.05528	0.644902
F1PF03	Receptor protein-tyrosine kinase OS=Canis lupus familiaris GN=EGFR PE=3 SV=2 - [F1PF03_CANLF]	1.53	1	1	1	2	1180	131.445	6.91748	1.12969	1.23185	1.18077	1.31431	1.17692	1.24562	1.05491	0.647056
E2RS79	Uncharacterized protein OS=Canis lupus familiaris GN=C2 PE=3 SV=2 - [E2RS79_CANLF]	43.46	1	7	31	165	780	86.2334	7.97217	0.98529	1.02676	1.00603	0.926418	0.966273	0.946345	0.940676	0.654867
P19540	Coagulation factor IX OS=Canis lupus familiaris GN=F9 PE=1 SV=1 - [FA9_CANLF]	23.23	2	10	10	43	452	50.7948	6.17627	0.858902	0.893327	0.876115	0.93245	0.913472	0.922961	1.05347	0.655579
E2RKW4	Uncharacterized protein OS=Canis lupus familiaris GN=CRISP2 PE=3 SV=2 - [E2RKW4_CANLF]	6.01	2	1	1	2	183	20.8112	7.7085	0.997922	0.901768	0.949845	0.934925	0.854634	0.89478	0.942027	0.662402
F1PNS6	Uncharacterized protein OS=Canis lupus familiaris GN=PEPD PE=3 SV=2 - [F1PNS6_CANLF]	25.13	1	9	9	37	386	43.151	5.65576	1.05025	1.08949	1.06987	1.02677	0.988991	1.00788	0.942059	0.662582
F6Y6T8	Uncharacterized protein OS=Canis lupus familiaris GN=PIGR PE=4 SV=1 - [F6Y6T8_CANLF]	29.13	4	15	15	54	762	83.142	5.51611	1.14279	1.09924	1.12101	1.03046	1.08189	1.05618	0.94216	0.663148
E2RNW1	Uncharacterized protein OS=Canis lupus familiaris GN=PIBF1 PE=4 SV=1 - [E2RNW1_CANLF]	0.92	1	1	1	5	757	90.1146	6.04932	0.970738	1.05705	1.01389	1.0821	1.05131	1.06671	1.05209	0.66379
P54714	Triosephosphate isomerase OS=Canis lupus familiaris GN=TPI1 PE=1 SV=3 - [TPIS_CANLF]	32.93	2	6	6	14	249	26.6978	7.32764	0.899194	1.0207	0.959947	0.889932	0.919611	0.904772	0.942522	0.665172
P00011	Cytochrome c OS=Canis lupus familiaris GN=CYCS PE=1 SV=2 - [CYC_CANLF]	40.95	1	4	4	16	105	11.6251	9.5835	0.599554	0.65302	0.626287	0.683238	0.633326	0.658282	1.05109	0.66978
E2R0J4	Uncharacterized protein OS=Canis lupus familiaris GN=ANTXR2 PE=4 SV=2 - [E2R0J4_CANLF]	4.64	1	2	2	3	496	54.1785	8.60205	0.903753	0.987065	0.945409	0.918621	1.06865	0.993634	1.05101	0.670239
P25473	Clusterin OS=Canis lupus familiaris GN=CLU PE=2 SV=1 - [CLUS_CANLF]	33.93	2	19	19	350	445	51.7566	5.90967	0.953118	0.961669	0.957394	1.00448	1.00728	1.00588	1.05064	0.672438
F1PJ74	Apolipoprotein E OS=Canis lupus familiaris GN=APOE PE=3 SV=1 - [F1PJ74_CANLF]	61.92	5	2	23	261	323	37.2012	5.30029	0.651818	0.590629	0.621224	0.659192	0.645754	0.652473	1.0503	0.674472
P01784	Ig heavy chain V region GOM OS=Canis lupus familiaris PE=1 SV=1 - [HV01_CANLF]	42.98	1	2	3	206	114	12.4221	5.40186	1.04557	0.989796	1.01768	0.960148	0.961656	0.960902	0.944204	0.674598
J9NVC6	Uncharacterized protein OS=Canis lupus familiaris PE=4 SV=1 - [J9NVC6_CANLF]	33.71	2	17	19	1030	620	67.6004	5.31299	0.905943	0.922659	0.914301	0.972685	0.947532	0.960108	1.0501	0.675689
F1PKR3	Uncharacterized protein OS=Canis lupus familiaris GN=VCL PE=4 SV=2 - [F1PKR3_CANLF]	16.29	3	15	15	28	1062	115.46	6.02393	1.11552	1.04376	1.07964	1.08503	0.954849	1.01994	0.944703	0.677398
E2RRQ0	Uncharacterized protein OS=Canis lupus familiaris GN=SON PE=4 SV=1 - [E2RRQ0_CANLF]	0.58	2	1	1	3	2415	262.267	5.59229	1.34658	0.948704	1.14764	1.22762	1.18121	1.20441	1.04947	0.679497
J9NWS3	Keratin, type I cytoskeletal 9 OS=Canis lupus familiaris GN=KRT9 PE=3 SV=1 - [J9NWS3_CANLF]	2.69	4	1	2	9	595	59.3613	5.31299	0.789265	0.764154	0.77671	0.728703	0.900507	0.814605	1.04879	0.683599
E2QX19	Uncharacterized protein OS=Canis lupus familiaris GN=MST1 PE=3 SV=2 - [E2QX19_CANLF]	6.47	2	4	4	7	711	80.1645	7.47412	1.08302	0.913106	0.99806	1.02883	1.06466	1.04675	1.04878	0.683639
F1Q4A3	Uncharacterized protein OS=Canis lupus familiaris GN=F10 PE=3 SV=2 - [F1Q4A3_CANLF]	17.71	2	8	8	46	497	54.628	5.17334	0.959784	0.929656	0.94472	0.985715	0.994552	0.990133	1.04807	0.687951
F1PCK2	Uncharacterized protein OS=Canis lupus familiaris GN=A1BG PE=4 SV=2 - [F1PCK2_CANLF]	53.47	1	21	21	672	533	57.8615	6.04932	1.00179	1.05319	1.02749	0.96906	0.976734	0.972897	0.946868	0.689595
L7N0L9	Uncharacterized protein OS=Canis lupus familiaris PE=3 SV=1 - [L7N0L9_CANLF]	3.72	3	1	1	3	349	38.4703	7.44482	1.3768	1.30562	1.34121	1.20787	1.33501	1.27144	0.947979	0.695874
F1PIX8	Uncharacterized protein OS=Canis lupus familiaris GN=C3 PE=4 SV=2 - [F1PIX8_CANLF]	72.2	2	122	122	4504	1662	186.787	6.87354	0.967343	0.970157	0.96875	1.01347	1.01381	1.01364	1.04634	0.698513
F1PG16	Uncharacterized protein OS=Canis lupus familiaris GN=CD5L PE=4 SV=2 - [F1PG16_CANLF]	59.71	3	19	19	269	340	37.6728	5.69385	0.947779	0.951673	0.949726	1.03895	0.948155	0.993555	1.04615	0.699659
E2RK02	Uncharacterized protein OS=Canis lupus familiaris GN=GPLD1 PE=4 SV=2 - [E2RK02_CANLF]	40.62	1	28	28	231	842	92.7827	6.15088	0.962192	0.952756	0.957474	1.02529	0.977709	1.0015	1.04598	0.700687
T2KEN6	Pentaxin OS=Canis lupus familiaris GN=CRP PE=2 SV=1 - [T2KEN6_CANLF]	43.95	2	7	7	50	223	25.3669	6.03662	0.785117	0.685792	0.735455	0.74313	0.653518	0.698324	0.949513	0.704567
L7N0E7	Uncharacterized protein OS=Canis lupus familiaris GN=LOC612180 PE=4 SV=1 - [L7N0E7_CANLF]	31.03	1	1	3	53	145	15.2555	5.35107	1.19143	1.33694	1.26419	1.20385	1.19907	1.20146	0.950383	0.709509
F1PKL6	Uncharacterized protein OS=Canis lupus familiaris PE=4 SV=2 - [F1PKL6_CANLF]	31.51	1	3	3	22	146	15.6575	5.10986	0.968427	1.11154	1.03998	1.00279	0.974632	0.988712	0.950701	0.711314
E2QUV3	Uncharacterized protein OS=Canis lupus familiaris GN=AHSG PE=4 SV=2 - [E2QUV3_CANLF]	44.38	1	14	14	636	365	39.2228	5.31299	1.08416	1.08867	1.08641	1.01979	1.04747	1.03363	0.95141	0.715349
E2RT65	Uncharacterized protein OS=Canis lupus familiaris GN=PGAM1 PE=3 SV=2 - [E2RT65_CANLF]	5.51	1	1	1	2	254	28.8038	7.18115	0.848779	0.923251	0.886015	0.933387	0.915119	0.924253	1.04316	0.71806
F1Q418	Uncharacterized protein OS=Canis lupus familiaris GN=ITIH1 PE=4 SV=2 - [F1Q418_CANLF]	43.52	1	33	33	421	910	100.935	6.97607	0.99121	1.00876	0.999985	1.03501	1.05127	1.04314	1.04316	0.718072
F1PZC6	Uncharacterized protein OS=Canis lupus familiaris GN=HRG PE=4 SV=2 - [F1PZC6_CANLF]	27.19	1	15	15	417	537	59.995	7.26904	1.07444	1.11761	1.09603	1.02595	1.06093	1.04344	0.952023	0.718838
F6V9A6	Uncharacterized protein OS=Canis lupus familiaris GN=COL6A3 PE=4 SV=1 - [F6V9A6_CANLF]	2.25	4	5	5	8	2671	288.972	8.55811	1.09489	1.11191	1.1034	1.11421	0.986812	1.05051	0.952066	0.719089
F1PHN8	Uncharacterized protein OS=Canis lupus familiaris GN=SERPINA4 PE=3 SV=2 - [F1PHN8_CANLF]	30.35	1	12	12	65	425	48.451	7.40088	0.929564	0.972358	0.950961	1.00516	0.977301	0.991233	1.04235	0.723076
E2RE76	Apolipoprotein A-IV OS=Canis lupus familiaris GN=APOA4 PE=3 SV=2 - [APOA4_CANLF]	61.9	1	27	27	437	378	42.5099	6.0874	1.01919	0.996977	1.00808	0.946096	0.975102	0.960599	0.952898	0.723832
J9P9X0	Uncharacterized protein OS=Canis lupus familiaris GN=IL1RAP PE=4 SV=1 - [J9P9X0_CANLF]	15.3	3	8	8	23	523	60.0296	5.98584	0.915588	0.956042	0.935815	0.987725	0.962289	0.975007	1.04188	0.725988
E2R833	Uncharacterized protein OS=Canis lupus familiaris GN=LRG1 PE=4 SV=2 - [E2R833_CANLF]	53.6	2	17	17	226	347	38.025	6.58057	0.850092	0.872219	0.861155	0.88846	0.905905	0.897182	1.04184	0.726263
J9P4Z4	Dipeptidase OS=Canis lupus familiaris GN=DPEP3 PE=3 SV=1 - [J9P4Z4_CANLF]	5.47	1	2	2	4	512	56.6114	9.31982	0.954919	1.00511	0.980016	0.950594	1.09054	1.02057	1.04138	0.72911
F1Q185	Uncharacterized protein OS=Canis lupus familiaris PE=4 SV=2 - [F1Q185_CANLF]	29.33	1	3	3	20	150	16.0739	5.74463	0.998413	1.10718	1.0528	0.933653	1.07564	1.00465	0.954265	0.731643
F1PZR4	Hemopexin OS=Canis lupus familiaris GN=HPX PE=3 SV=2 - [F1PZR4_CANLF]	60.48	1	25	25	651	458	51.3053	7.31299	0.926723	0.930057	0.92839	0.967927	0.963464	0.965696	1.04018	0.736577
J9P732	Uncharacterized protein OS=Canis lupus familiaris GN=S100A9 PE=3 SV=1 - [J9P732_CANLF]	8.85	1	2	2	3	192	21.4315	6.45557	0.980836	0.920314	0.950575	1.20945	0.768039	0.988744	1.04015	0.736761
J9P1F6	Uncharacterized protein OS=Canis lupus familiaris PE=4 SV=1 - [J9P1F6_CANLF]	31.91	1	2	3	77	141	15.1004	8.30908	1.02445	1.07473	1.04959	0.964935	1.04011	1.00252	0.955159	0.736762
F1PAX2	Uncharacterized protein OS=Canis lupus familiaris GN=CP PE=3 SV=2 - [F1PAX2_CANLF]	38.59	2	38	38	497	1065	122.484	6.59521	0.927045	0.987947	0.957496	0.995394	0.995213	0.995304	1.03949	0.740946
E2QZ19	Uncharacterized protein OS=Canis lupus familiaris GN=AFM PE=4 SV=1 - [E2QZ19_CANLF]	59.63	2	37	37	383	602	68.9231	5.26221	0.992704	1.00018	0.99644	1.04542	1.02592	1.03567	1.03937	0.741678
J9P5C8	Uncharacterized protein OS=Canis lupus familiaris PE=4 SV=1 - [J9P5C8_CANLF]	55.56	1	3	5	135	117	12.8654	7.82568	0.873583	0.882475	0.878029	0.910277	0.914553	0.912415	1.03916	0.742977
F1PNV5	Prekallikrein OS=Canis lupus familiaris GN=KLKB1 PE=2 SV=2 - [F1PNV5_CANLF]	28.93	2	15	17	62	636	70.8423	7.95752	0.982792	0.956134	0.969463	1.02589	0.987584	1.00674	1.03845	0.747483
J9PAD4	Uncharacterized protein OS=Canis lupus familiaris PE=4 SV=1 - [J9PAD4_CANLF]	36	2	1	3	73	125	13.0283	5.89697	1.12451	1.17166	1.14809	1.06977	1.128	1.09888	0.957145	0.748155
J9P9J6	Uncharacterized protein OS=Canis lupus familiaris PE=4 SV=1 - [J9P9J6_CANLF]	53.85	1	14	14	220	338	36.9543	5.50342	0.963743	0.965154	0.964449	1.01151	0.991115	1.00131	1.03822	0.748885
J9PAA4	Uncharacterized protein OS=Canis lupus familiaris GN=CPN2 PE=4 SV=1 - [J9PAA4_CANLF]	33.27	1	15	15	136	547	59.1545	6.58057	1.07585	1.00289	1.03937	1.00312	0.987506	0.995313	0.957611	0.750835
F1Q041	Uncharacterized protein OS=Canis lupus familiaris GN=F13B PE=4 SV=2 - [F1Q041_CANLF]	28.04	1	17	17	76	649	74.2595	6.65381	0.967014	0.895545	0.93128	0.960858	0.972116	0.966487	1.03781	0.751529
J9P9G4	Proteasome subunit alpha type OS=Canis lupus familiaris PE=3 SV=1 - [J9P9G4_CANLF]	23.57	6	6	6	15	263	29.3158	6.60986	1.08922	0.980151	1.03469	0.95294	1.02961	0.991275	0.958044	0.753322
F1PH61	Uncharacterized protein OS=Canis lupus familiaris PE=4 SV=2 - [F1PH61_CANLF]	33.09	1	3	3	42	136	14.5432	5.75732	0.872713	0.873202	0.872958	0.877103	0.933653	0.905378	1.03714	0.755747
E2R489	Uncharacterized protein OS=Canis lupus familiaris GN=KRT84 PE=3 SV=1 - [E2R489_CANLF]	4.27	24	1	3	6	586	63.3318	8.00146	0.939762	0.912353	0.926057	0.959292	0.816253	0.887772	0.958658	0.756856
F1P7J4	Uncharacterized protein OS=Canis lupus familiaris GN=C5 PE=4 SV=2 - [F1P7J4_CANLF]	45.47	1	63	63	456	1689	188.548	6.59521	0.92601	0.937258	0.931634	0.961071	0.968719	0.964895	1.0357	0.764862
F1PDJ7	Uncharacterized protein OS=Canis lupus familiaris GN=AZGP1 PE=3 SV=2 - [F1PDJ7_CANLF]	55.24	2	17	17	156	315	35.8324	4.91943	0.961356	0.961489	0.961422	0.989062	1.00009	0.994574	1.03448	0.772641
F1PBT3	Fructose-bisphosphate aldolase OS=Canis lupus familiaris PE=3 SV=2 - [F1PBT3_CANLF]	6.99	7	4	4	7	701	74.8497	7.44482	1.10751	1.07571	1.09161	0.892333	1.21072	1.05153	0.96328	0.783537
F1PF90	Uncharacterized protein OS=Canis lupus familiaris PE=4 SV=2 - [F1PF90_CANLF]	29.5	1	5	5	22	139	14.8584	5.37646	0.974569	0.893657	0.934113	0.923635	0.876339	0.899987	0.963467	0.784618
F1PE28	Uncharacterized protein OS=Canis lupus familiaris GN=TKT PE=4 SV=2 - [F1PE28_CANLF]	18.58	1	9	9	23	576	63.1143	7.15186	1.01282	1.01044	1.01163	0.957764	0.991954	0.974859	0.963651	0.785683
J9NY02	Uncharacterized protein OS=Canis lupus familiaris PE=4 SV=1 - [J9NY02_CANLF]	61.43	1	4	7	144	140	15.3888	9.45166	1.03009	1.07446	1.05227	0.99218	1.03699	1.01459	0.964184	0.78877
J9P7F7	Uncharacterized protein OS=Canis lupus familiaris GN=LOC608247 PE=4 SV=1 - [J9P7F7_CANLF]	42.86	1	12	12	72	322	34.5098	7.03467	1.00003	1.00451	1.00227	0.955327	0.97876	0.967043	0.964855	0.792657
F1PWR2	Uncharacterized protein OS=Canis lupus familiaris PE=4 SV=2 - [F1PWR2_CANLF]	56.42	3	78	78	1419	1753	192.771	6.88818	0.973614	0.972075	0.972845	1.0087	0.997885	1.00329	1.0313	0.793091
L7N0I0	Uncharacterized protein OS=Canis lupus familiaris PE=4 SV=1 - [L7N0I0_CANLF]	63.77	1	3	5	130	69	7.88686	9.43701	0.932521	0.930924	0.931722	0.965175	0.956242	0.960709	1.03111	0.794302
F1PQ85	Uncharacterized protein OS=Canis lupus familiaris GN=MASP1 PE=3 SV=2 - [F1PQ85_CANLF]	16.51	2	9	10	26	763	85.5982	4.93213	1.14342	1.0352	1.08931	1.08887	1.1575	1.12318	1.03109	0.794408
F1PIC7	Uncharacterized protein OS=Canis lupus familiaris GN=HSPA5 PE=3 SV=2 - [F1PIC7_CANLF]	10.4	5	4	6	7	654	72.2385	5.16064	1.04017	1.0721	1.05613	1.11234	0.927237	1.01979	0.965585	0.796891
Q6QNF3	Platelet-derived growth factor receptor beta OS=Canis lupus familiaris GN=PDGFRB PE=2 SV=1 - [PGFRB_CANLF]	5.17	2	4	4	8	1103	122.944	5.10986	1.00793	1.16613	1.08703	1.15019	0.949241	1.04972	0.965675	0.797415
J9P5I4	Uncharacterized protein OS=Canis lupus familiaris PE=4 SV=1 - [J9P5I4_CANLF]	7.97	1	1	1	9	138	15.3026	8.68994	1.13806	1.02724	1.08265	1.05578	1.03614	1.04596	0.966111	0.799942
E2R7A3	Uncharacterized protein OS=Canis lupus familiaris GN=CFI PE=3 SV=2 - [E2R7A3_CANLF]	36.11	1	3	18	116	565	62.9423	7.29834	0.769065	0.883716	0.82639	0.787289	0.810351	0.79882	0.966637	0.802998
E2RG01	Uncharacterized protein OS=Canis lupus familiaris GN=C7 PE=4 SV=2 - [E2RG01_CANLF]	44.73	1	32	32	142	863	94.8793	6.81494	0.99322	0.985476	0.989348	1.02393	1.0122	1.01806	1.02902	0.807827
F1PHS2	Uncharacterized protein OS=Canis lupus familiaris GN=SERPINA6 PE=3 SV=2 - [F1PHS2_CANLF]	32.67	7	13	13	51	404	45.447	6.02393	1.02866	0.994511	1.01158	1.07281	1.00859	1.0407	1.02878	0.809408
F1PKX3	Uncharacterized protein OS=Canis lupus familiaris GN=F13A1 PE=4 SV=2 - [F1PKX3_CANLF]	35.06	1	21	21	68	733	83.3351	6.20166	1.05496	1.12437	1.08966	1.06911	1.04212	1.05561	0.968752	0.815283
J9P6Z9	Uncharacterized protein OS=Canis lupus familiaris PE=4 SV=1 - [J9P6Z9_CANLF]	64.66	1	2	4	95	116	12.5182	6.59521	0.971882	0.980555	0.976219	0.943362	0.94807	0.945716	0.968754	0.815297
E2RJT2	Uncharacterized protein OS=Canis lupus familiaris GN=BST1 PE=4 SV=2 - [E2RJT2_CANLF]	15.05	1	4	4	12	319	35.3646	5.80811	1.01873	0.968281	0.993504	0.982018	0.943983	0.963001	0.969298	0.81846
J9NWJ0	Peptidoglycan-recognition protein OS=Canis lupus familiaris GN=PGLYRP1 PE=3 SV=1 - [J9NWJ0_CANLF]	12.24	1	2	2	4	196	21.6569	8.20654	0.9076	0.869006	0.888303	0.891203	0.933263	0.912233	1.02694	0.821425
F1Q1K9	Uncharacterized protein OS=Canis lupus familiaris GN=HABP2 PE=3 SV=2 - [F1Q1K9_CANLF]	17.35	2	13	13	68	559	62.4718	6.97607	1.03028	0.93347	0.981877	0.95384	0.951028	0.952434	0.970014	0.822628
F6Y290	Leukotriene A(4) hydrolase OS=Canis lupus familiaris GN=LTA4H PE=3 SV=1 - [F6Y290_CANLF]	8.13	1	5	5	7	701	78.662	7.03467	1.0788	1.10484	1.09182	1.05002	1.06873	1.05937	0.970281	0.824183
E2QW82	Uncharacterized protein OS=Canis lupus familiaris GN=MMP19 PE=3 SV=2 - [E2QW82_CANLF]	17.57	1	8	8	16	569	64.0522	7.1958	0.99604	1.02416	1.0101	0.984049	1.08877	1.03641	1.02605	0.827269
H9GWY3	Uncharacterized protein OS=Canis lupus familiaris GN=ITIH4 PE=4 SV=2 - [H9GWY3_CANLF]	51.59	2	44	44	668	911	100.736	7.32764	0.917447	0.910812	0.91413	0.889494	0.88565	0.887572	0.970948	0.828063
F1PIG0	Uncharacterized protein OS=Canis lupus familiaris GN=TGFBR3 PE=4 SV=2 - [F1PIG0_CANLF]	2.57	1	2	2	4	857	94.1563	5.79541	0.911584	0.917654	0.914619	1.02445	0.851829	0.93814	1.02572	0.829436
E2R886	Uncharacterized protein OS=Canis lupus familiaris GN=KNG1 PE=4 SV=2 - [E2R886_CANLF]	32.69	1	14	14	282	416	46.4897	6.91748	0.984128	1.04022	1.01217	1.02053	1.05578	1.03816	1.02567	0.829747
E2R5U8	Transthyretin OS=Canis lupus familiaris GN=TTR PE=3 SV=1 - [E2R5U8_CANLF]	71.43	2	10	10	91	147	15.8582	6.91748	0.81464	0.707352	0.760996	0.797342	0.763254	0.780298	1.02536	0.831749
E2R7Z9	Uncharacterized protein OS=Canis lupus familiaris GN=ACOT11 PE=4 SV=2 - [E2R7Z9_CANLF]	2.69	2	1	1	2	558	63.0097	7.75244	1.33473	0.729318	1.03203	1.14103	0.864476	1.00275	0.971636	0.832073
A9QU57	CD14 antigen (Fragment) OS=Canis lupus familiaris GN=CD14 PE=2 SV=1 - [A9QU57_CANLF]	43.4	1	3	3	12	106	11.2929	9.27588	0.862789	0.820458	0.841623	0.82649	0.899136	0.862813	1.02518	0.832979
P01785	Ig heavy chain V region MOO OS=Canis lupus familiaris PE=1 SV=1 - [HV02_CANLF]	23.08	1	2	2	33	117	12.6952	4.71631	1.21781	1.09817	1.15799	1.14937	1.10142	1.12539	0.971852	0.833329
J9P319	Uncharacterized protein OS=Canis lupus familiaris GN=OMD PE=4 SV=1 - [J9P319_CANLF]	13.53	2	5	5	12	414	48.4607	5.35107	1.15651	0.954867	1.05569	1.00425	1.15999	1.08212	1.02504	0.833872
E2R7G9	Uncharacterized protein OS=Canis lupus familiaris PE=4 SV=2 - [E2R7G9_CANLF]	58.09	1	5	5	80	136	14.63	5.38916	0.964052	0.962039	0.963045	1.0077	0.96631	0.987005	1.02488	0.83494
E2R141	Uncharacterized protein OS=Canis lupus familiaris GN=C8B PE=4 SV=1 - [E2R141_CANLF]	39.66	1	18	18	95	590	66.9556	7.79639	1.03165	0.954306	0.99298	1.01794	1.01601	1.01697	1.02416	0.839657
E2RPW3	Uncharacterized protein OS=Canis lupus familiaris GN=PON1 PE=4 SV=2 - [E2RPW3_CANLF]	40.17	1	12	12	226	356	40.1427	5.42725	1.00718	1.08922	1.0482	1.01599	1.02373	1.01986	0.972967	0.839831
J9P430	Uncharacterized protein OS=Canis lupus familiaris GN=TF PE=3 SV=1 - [J9P430_CANLF]	81.08	3	66	69	3213	756	83.3232	7.88428	0.921861	0.941272	0.931567	0.944616	0.963232	0.953924	1.024	0.840731
E2RKZ6	Uncharacterized protein OS=Canis lupus familiaris GN=PON3 PE=4 SV=1 - [E2RKZ6_CANLF]	7.06	1	2	2	3	354	39.6775	6.30322	0.947237	0.989028	0.968133	0.926215	0.958733	0.942474	0.973497	0.842917
E2R416	Uncharacterized protein OS=Canis lupus familiaris GN=LUM PE=4 SV=1 - [E2R416_CANLF]	38.76	1	11	11	59	338	38.3228	6.68311	1.03557	1.03623	1.0359	1.06561	1.05475	1.06018	1.02344	0.844442
E2RES2	Uncharacterized protein OS=Canis lupus familiaris GN=SERPINC1 PE=3 SV=2 - [E2RES2_CANLF]	60.86	1	31	31	675	465	52.4327	6.69775	1.01423	1.02814	1.02118	1.03022	1.05766	1.04394	1.02228	0.852086
F1P707	Uncharacterized protein OS=Canis lupus familiaris PE=4 SV=2 - [F1P707_CANLF]	36.91	2	52	52	341	1661	186.676	7.29834	0.964521	0.967569	0.966045	0.98583	0.989238	0.987534	1.02224	0.852337
J9NSF9	Prothrombin OS=Canis lupus familiaris GN=F2 PE=3 SV=1 - [J9NSF9_CANLF]	52.33	4	30	30	343	621	70.2585	5.99854	0.971063	0.978688	0.974876	0.986353	1.00595	0.996154	1.02183	0.855107
F1PNY2	Uncharacterized protein OS=Canis lupus familiaris PE=4 SV=2 - [F1PNY2_CANLF]	51.26	6	7	9	205	238	26.2349	5.80811	0.919497	0.955901	0.937699	0.99492	0.835278	0.915099	0.975898	0.85693
F1P9E5	Platelet-activating factor acetylhydrolase OS=Canis lupus familiaris GN=PLA2G7 PE=4 SV=1 - [F1P9E5_CANLF]	36.26	2	13	13	46	444	50.1183	6.48096	0.963543	1.02601	0.994775	0.977756	0.964388	0.971072	0.976173	0.858531
Q7M321	Plasmin (Fragments) OS=Canis lupus familiaris PE=4 SV=1 - [Q7M321_CANLF]	70	2	1	8	76	120	13.4782	6.87354	0.99771	1.03143	1.01457	1.01493	1.05725	1.03609	1.02121	0.85917
F6XZU1	Uncharacterized protein OS=Canis lupus familiaris GN=PGLYRP2 PE=4 SV=1 - [F6XZU1_CANLF]	31.67	2	10	10	20	562	61.0583	7.18115	1.13265	1.06862	1.10063	1.06717	1.18069	1.12393	1.02117	0.859468
E2RAK7	Apolipoprotein A-II OS=Canis lupus familiaris GN=APOA2 PE=1 SV=2 - [APOA2_CANLF]	61	1	6	6	256	100	11.2179	6.65381	0.977529	0.988433	0.982981	0.976436	0.944418	0.960427	0.977056	0.863686
E2RKI1	Uncharacterized protein OS=Canis lupus familiaris GN=DMKN PE=4 SV=2 - [E2RKI1_CANLF]	7.71	4	2	2	4	454	43.3521	6.94678	0.936771	1.14903	1.0429	1.09669	0.941329	1.01901	0.97709	0.863886
J9P4E8	Uncharacterized protein OS=Canis lupus familiaris PE=4 SV=1 - [J9P4E8_CANLF]	66.37	6	3	5	110	113	12.4501	8.32373	1.19108	1.22581	1.20845	1.31253	1.15372	1.23312	1.02042	0.864439
E2RPB8	Uncharacterized protein OS=Canis lupus familiaris GN=CLEC3B PE=4 SV=2 - [E2RPB8_CANLF]	45.71	1	7	7	69	175	19.1312	5.5415	1.04263	1.05059	1.04661	1.04722	1.08836	1.06779	1.02023	0.865687
J9P028	Glutathione peroxidase OS=Canis lupus familiaris GN=GPX3 PE=3 SV=1 - [J9P028_CANLF]	60.78	4	9	9	106	153	17.3259	7.97217	0.951585	0.9938	0.972692	0.998043	0.986585	0.992314	1.02017	0.866097
E2RM78	Uncharacterized protein OS=Canis lupus familiaris GN=ISLR PE=4 SV=2 - [E2RM78_CANLF]	3.28	1	1	1	4	488	51.6722	5.2876	1.18026	1.19161	1.18593	1.18993	1.22959	1.20976	1.02009	0.866637
E2R4V3	Uncharacterized protein OS=Canis lupus familiaris GN=SERPINF2 PE=3 SV=1 - [E2R4V3_CANLF]	52.34	1	22	22	224	491	54.9185	7.18115	0.920403	0.998139	0.959271	0.949915	1.0062	0.978058	1.01958	0.870017
F1PD34	Uncharacterized protein OS=Canis lupus familiaris GN=SPP2 PE=4 SV=2 - [F1PD34_CANLF]	11.06	2	2	2	10	199	22.7462	7.18115	0.960848	0.879227	0.920037	0.984961	0.890601	0.937781	1.01929	0.87201
E2RQ71	Uncharacterized protein OS=Canis lupus familiaris GN=APOM PE=4 SV=2 - [E2RQ71_CANLF]	41.49	1	6	6	41	188	21.4155	6.85889	0.992518	0.963648	0.978083	1.01506	0.978469	0.996766	1.0191	0.873241
P49822	Serum albumin OS=Canis lupus familiaris GN=ALB PE=1 SV=3 - [ALBU_CANLF]	90.63	4	4	79	12581	608	68.56	5.69385	0.927756	0.955753	0.941754	0.9253	0.91886	0.92208	0.979109	0.875677
J9PAX5	Uncharacterized protein OS=Canis lupus familiaris PE=4 SV=1 - [J9PAX5_CANLF]	51.13	1	3	5	119	133	14.6742	7.76709	0.93416	0.929833	0.931997	0.892304	0.936118	0.914211	0.980917	0.886237
L7N0K1	Uncharacterized protein OS=Canis lupus familiaris PE=4 SV=1 - [L7N0K1_CANLF]	9.2	1	1	1	9	174	18.1347	8.06006	1.09165	1.07096	1.0813	1.06887	1.05318	1.06102	0.981243	0.888145
F6USM4	Uncharacterized protein OS=Canis lupus familiaris GN=MASP2 PE=3 SV=1 - [F6USM4_CANLF]	7	1	3	3	6	686	74.8844	5.8335	0.954011	1.06615	1.01008	1.04546	0.937275	0.991369	0.981475	0.889502
F1PSS2	Uncharacterized protein OS=Canis lupus familiaris GN=THBS4 PE=4 SV=2 - [F1PSS2_CANLF]	5.84	2	4	4	6	873	96.1207	4.61475	1.12694	1.08228	1.10461	1.10082	1.06813	1.08447	0.981767	0.891205
E2RLF1	Uncharacterized protein OS=Canis lupus familiaris GN=PSAP PE=4 SV=1 - [E2RLF1_CANLF]	2.86	1	1	1	5	524	57.9448	5.05908	0.825076	0.75999	0.792533	0.763093	0.793142	0.778117	0.981811	0.89146
E2R5E9	Uncharacterized protein OS=Canis lupus familiaris PE=4 SV=2 - [E2R5E9_CANLF]	21.28	1	1	1	8	47	5.56684	8.48486	0.925211	0.991633	0.958422	0.96134	0.984762	0.973051	1.01526	0.898977
L7N0K2	Uncharacterized protein OS=Canis lupus familiaris PE=4 SV=1 - [L7N0K2_CANLF]	57.85	1	3	5	148	121	13.4906	9.05615	1.20863	1.18858	1.1986	1.21436	1.14331	1.17883	0.983505	0.90136
F1Q421	Plasminogen OS=Canis lupus familiaris GN=PLG PE=3 SV=2 - [F1Q421_CANLF]	58.37	7	34	41	505	812	91.1103	7.07861	0.940895	0.972567	0.956731	0.965625	0.976271	0.970948	1.01486	0.901692
F1PKN5	Uncharacterized protein OS=Canis lupus familiaris PE=4 SV=2 - [F1PKN5_CANLF]	10.96	1	1	1	22	146	15.8107	5.35107	0.923115	0.957885	0.9405	0.997411	0.910691	0.954051	1.01441	0.904738
F1PGM9	Uncharacterized protein OS=Canis lupus familiaris GN=C4BPA PE=4 SV=2 - [F1PGM9_CANLF]	49.81	1	22	22	310	514	57.9211	6.82959	0.908848	0.915916	0.912382	0.928572	0.921922	0.925247	1.0141	0.906819
E2QUY1	Uncharacterized protein OS=Canis lupus familiaris GN=RASA3 PE=4 SV=2 - [E2QUY1_CANLF]	0.72	1	1	1	9	834	95.6972	7.43018	0.876192	0.88068	0.878436	0.89564	0.88599	0.890815	1.01409	0.906874
P19006	Haptoglobin OS=Canis lupus familiaris GN=HP PE=1 SV=2 - [HPT_CANLF]	80.24	3	30	30	2258	329	36.4342	6.0874	1.0496	1.04548	1.04754	1.03933	1.02358	1.03146	0.984643	0.908003
E2RN10	Beta-2-microglobulin OS=Canis lupus familiaris GN=B2M PE=2 SV=2 - [E2RN10_CANLF]	16.8	1	2	2	17	125	14.2543	6.3667	1.01663	0.87544	0.946035	0.927498	0.990918	0.959208	1.01392	0.908006
F1PG39	Uncharacterized protein OS=Canis lupus familiaris GN=ITIH2 PE=4 SV=2 - [F1PG39_CANLF]	37.66	1	30	30	308	948	107.17	7.53271	1.0055	1.02176	1.01363	1.01517	1.03989	1.02753	1.01371	0.909427
E2QXJ3	Uncharacterized protein OS=Canis lupus familiaris PE=4 SV=1 - [E2QXJ3_CANLF]	25.86	1	2	2	5	116	12.6472	4.95752	0.983463	1.11264	1.04805	1.02817	1.09596	1.06206	1.01337	0.911748
F1PMH6	Uncharacterized protein OS=Canis lupus familiaris GN=MRC1 PE=4 SV=2 - [F1PMH6_CANLF]	1.44	2	2	2	3	1455	165.602	6.50732	0.745176	0.957795	0.851485	0.805389	0.873656	0.839522	0.98595	0.915639
J9JHE6	Uncharacterized protein OS=Canis lupus familiaris GN=DNAH10 PE=4 SV=1 - [J9JHE6_CANLF]	0.65	3	2	2	3	4028	464.092	6.03662	0.723259	1.24966	0.986457	0.981079	0.964233	0.972656	0.986009	0.915983
F1PAL5	Uncharacterized protein OS=Canis lupus familiaris GN=AGT PE=3 SV=2 - [F1PAL5_CANLF]	40.88	4	20	20	208	477	51.7168	5.98584	0.927366	0.933317	0.930341	0.899183	0.935521	0.917352	0.986038	0.916154
E2RS80	Uncharacterized protein OS=Canis lupus familiaris GN=C2 PE=3 SV=2 - [E2RS80_CANLF]	55.36	2	40	64	698	1268	141.215	7.32764	0.944636	0.963053	0.953845	0.931781	0.949684	0.940733	0.986253	0.91741
Q28278	Vitamin K-dependent protein C OS=Canis lupus familiaris GN=PROC PE=2 SV=2 - [PROC_CANLF]	12.28	2	5	5	16	456	50.7805	6.12549	1.1679	1.06964	1.11877	1.23352	1.03125	1.13238	1.01217	0.919878
F2Z4Q6	Serum albumin OS=Canis lupus familiaris GN=ALB PE=4 SV=1 - [F2Z4Q6_CANLF]	90.63	4	5	80	12948	608	68.5619	5.69385	0.96721	0.981246	0.974228	0.958269	0.965238	0.961753	0.987196	0.922911
Q28284	CD44 antigen (Fragment) OS=Canis lupus familiaris GN=CD44 PE=2 SV=1 - [CD44_CANLF]	8.83	3	3	3	19	351	38.0426	6.34131	0.932017	0.984624	0.95832	0.973522	0.919572	0.946547	0.987715	0.925942
F6Y3P9	Uncharacterized protein OS=Canis lupus familiaris GN=GSN PE=4 SV=1 - [F6Y3P9_CANLF]	39.34	3	30	30	335	783	85.1912	6.50732	1.02805	1.0353	1.03168	1.01814	1.0201	1.01912	0.987832	0.926624
F1PAB0	Uncharacterized protein OS=Canis lupus familiaris PE=4 SV=2 - [F1PAB0_CANLF]	18.1	1	7	7	19	569	62.1199	5.26221	0.99713	0.970872	0.984001	0.995887	0.948314	0.9721	0.987906	0.927057
F1PLT8	Sulfhydryl oxidase OS=Canis lupus familiaris GN=QSOX1 PE=4 SV=2 - [F1PLT8_CANLF]	43.06	1	24	24	160	713	79.0925	8.77783	0.970061	0.983006	0.976533	0.95514	0.976413	0.965776	0.988985	0.93335
E2R9D2	Uncharacterized protein OS=Canis lupus familiaris GN=F12 PE=3 SV=2 - [E2R9D2_CANLF]	21.8	1	7	7	18	399	43.1163	8.70459	0.968351	0.950324	0.959337	0.975658	0.962186	0.968922	1.00999	0.934663
F1PFM6	Uncharacterized protein OS=Canis lupus familiaris GN=COL6A1 PE=4 SV=2 - [F1PFM6_CANLF]	1.27	1	1	1	4	1026	108.51	5.5415	0.901632	1.12621	1.01392	1.03476	1.01227	1.02351	1.00946	0.938288
E2RCC8	Uncharacterized protein OS=Canis lupus familiaris PE=4 SV=2 - [E2RCC8_CANLF]	52.22	2	19	22	1834	473	51.9588	7.34229	0.979249	1.00521	0.99223	0.987466	0.977689	0.982577	0.990272	0.940858
E2R9B6	Uncharacterized protein OS=Canis lupus familiaris GN=FETUB PE=4 SV=1 - [E2R9B6_CANLF]	61.04	1	20	20	284	385	42.3063	5.92236	1.05878	1.03244	1.04561	1.06526	1.00608	1.03567	0.990499	0.942179
J9NYG8	Uncharacterized protein OS=Canis lupus familiaris GN=C4BPB PE=4 SV=1 - [J9NYG8_CANLF]	27.06	2	9	9	58	255	28.5237	5.18604	0.999978	1.01387	1.00692	1.04072	0.954588	0.997655	0.990796	0.943915
F1PYM4	Uncharacterized protein OS=Canis lupus familiaris GN=IGFALS PE=4 SV=2 - [F1PYM4_CANLF]	33.18	1	17	17	80	654	70.279	7.54736	1.01837	1.07682	1.04759	1.08977	1.0226	1.05618	1.0082	0.946866
J9JHH5	Uncharacterized protein OS=Canis lupus familiaris GN=JCHAIN PE=4 SV=1 - [J9JHH5_CANLF]	47.17	1	7	7	79	159	18.2399	4.81787	0.977357	0.969652	0.973505	0.969255	0.961155	0.965205	0.991474	0.947866
L7N0L4	Uncharacterized protein OS=Canis lupus familiaris PE=4 SV=1 - [L7N0L4_CANLF]	35.82	1	2	3	199	134	14.7043	8.26514	0.906704	0.867431	0.887068	0.882746	0.90557	0.894158	1.00799	0.94827
F6UME0	Uncharacterized protein OS=Canis lupus familiaris GN=A2M PE=4 SV=1 - [F6UME0_CANLF]	61.97	2	73	73	1689	1475	165.114	6.7124	1.02426	1.0287	1.02648	1.03825	1.0307	1.03448	1.00779	0.949622
J9P1G2	Uncharacterized protein OS=Canis lupus familiaris GN=C1QB PE=4 SV=1 - [J9P1G2_CANLF]	15.2	1	4	4	28	250	26.2794	9.02686	0.95574	1.06542	1.01058	1.04418	0.960398	1.00229	0.991793	0.949721
Q8HY81	Cathepsin S OS=Canis lupus familiaris GN=CTSS PE=2 SV=1 - [CATS_CANLF]	3.93	2	1	1	4	331	37.2041	8.1333	1.01861	1.06884	1.04373	0.952355	1.15079	1.05157	1.00752	0.951528
F1PYR5	Uncharacterized protein OS=Canis lupus familiaris PE=4 SV=2 - [F1PYR5_CANLF]	39.22	1	5	6	126	232	24.9363	6.87354	1.05165	1.08627	1.06896	1.0235	1.09796	1.06073	0.992302	0.95269
H9GWR0	Uncharacterized protein OS=Canis lupus familiaris PE=4 SV=2 - [H9GWR0_CANLF]	36	2	1	3	88	125	12.9722	5.89697	1.12969	1.14092	1.13531	1.12467	1.16253	1.1436	1.00731	0.952958
Q28256	Platelet glycoprotein Ib alpha chain OS=Canis lupus familiaris GN=GP1BA PE=2 SV=2 - [GP1BA_CANLF]	7.24	1	5	5	18	677	74.0861	5.90967	0.989213	1.04397	1.01659	1.05851	0.98912	1.02381	1.0071	0.954357
P01874	Ig mu chain C region OS=Canis lupus familiaris PE=1 SV=1 - [IGHM_CANLF]	10	1	2	3	135	450	48.8646	6.12549	1.11323	1.03902	1.07612	1.06608	1.10118	1.08363	1.00697	0.955225
F2Z4Q7	Uncharacterized protein OS=Canis lupus familiaris GN=SERPINF1 PE=3 SV=1 - [F2Z4Q7_CANLF]	40.19	1	15	15	144	418	46.4724	7.18115	0.965806	1.00476	0.985285	0.975192	0.981369	0.978281	0.992891	0.956117
F1PKI5	Uncharacterized protein OS=Canis lupus familiaris PE=4 SV=2 - [F1PKI5_CANLF]	71.07	2	1	5	119	121	13.2666	6.62451	1.20744	0.799211	1.00333	1.22736	0.765419	0.996388	0.993086	0.957252
E2QUU8	Uncharacterized protein OS=Canis lupus familiaris PE=4 SV=2 - [E2QUU8_CANLF]	13.79	1	1	2	46	145	15.6239	8.88037	1.45978	1.3383	1.39904	1.546	1.27019	1.40809	1.00647	0.958693
E2RJC2	Uncharacterized protein OS=Canis lupus familiaris GN=C1QC PE=4 SV=1 - [E2RJC2_CANLF]	25.31	1	5	5	24	245	25.6227	7.84033	0.906336	0.941672	0.924004	0.892572	0.943738	0.918155	0.99367	0.96065
E2RNL8	Uncharacterized protein OS=Canis lupus familiaris GN=APOD PE=3 SV=2 - [E2RNL8_CANLF]	28.78	2	7	7	62	205	23.1768	5.18604	0.991551	1.00008	0.995818	1.00337	0.975711	0.989539	0.993695	0.960796
E2QZQ1	Uncharacterized protein OS=Canis lupus familiaris GN=LOC477071 PE=3 SV=1 - [E2QZQ1_CANLF]	49.65	2	33	34	330	705	77.6691	6.88818	1.02726	0.962647	0.994954	1.00113	1.0003	1.00072	1.00579	0.963314
F1PWW0	Uncharacterized protein OS=Canis lupus familiaris GN=FLNA PE=4 SV=2 - [F1PWW0_CANLF]	2.57	4	5	5	16	2646	280.484	6.11279	1.11078	1.13005	1.12042	1.12722	1.10151	1.11437	0.9946	0.966064
E2R5W6	Uncharacterized protein OS=Canis lupus familiaris GN=GC PE=4 SV=2 - [E2R5W6_CANLF]	65.61	6	35	35	961	474	52.9396	5.32568	1.03183	1.053	1.04242	1.03445	1.03919	1.03682	0.994629	0.966231
J9P0R6	Uncharacterized protein OS=Canis lupus familiaris GN=MPO PE=4 SV=1 - [J9P0R6_CANLF]	5.48	2	3	3	5	657	74.027	9.68604	0.96796	1.07576	1.02186	0.967117	1.08755	1.02734	1.00536	0.966288
F1PH86	Uncharacterized protein OS=Canis lupus familiaris GN=SERPINA3 PE=3 SV=2 - [F1PH86_CANLF]	54.39	2	19	20	303	421	47.1104	6.11279	0.781516	0.838499	0.810007	0.806813	0.82178	0.814297	1.0053	0.96671
E2RLA5	Uncharacterized protein OS=Canis lupus familiaris GN=GOLM1 PE=4 SV=2 - [E2RLA5_CANLF]	19.46	1	7	7	16	406	45.5549	4.79248	1.00527	1.00306	1.00417	1.00455	1.01419	1.00937	1.00518	0.967496
J9P182	Uncharacterized protein OS=Canis lupus familiaris PE=4 SV=1 - [J9P182_CANLF]	65.25	1	3	5	110	118	12.7604	7.97217	0.923435	0.983682	0.953558	0.976157	0.940493	0.958325	1.005	0.968743
F1PW10	Uncharacterized protein OS=Canis lupus familiaris GN=TGFBI PE=4 SV=2 - [F1PW10_CANLF]	12.92	2	8	8	19	650	70.8175	6.53662	0.955072	1.05412	1.0046	1.02542	0.993227	1.00932	1.0047	0.970767
E2R3V1	Uncharacterized protein OS=Canis lupus familiaris GN=FCRL4 PE=4 SV=1 - [E2R3V1_CANLF]	2.91	1	1	1	6	516	56.5599	7.15186	1.13256	1.13076	1.13166	1.04547	1.2076	1.12653	0.995471	0.971125
J9NTL7	Uncharacterized protein OS=Canis lupus familiaris GN=LOC478952 PE=4 SV=1 - [J9NTL7_CANLF]	52.15	3	55	55	459	1233	139.641	6.49365	0.952855	0.938487	0.945671	0.925821	0.957396	0.941608	0.995704	0.972477
J9NYC0	Uncharacterized protein OS=Canis lupus familiaris GN=MFAP4 PE=4 SV=1 - [J9NYC0_CANLF]	9.84	1	2	2	11	254	28.3758	5.89697	1.07398	0.954842	1.01441	1.04211	0.978904	1.01051	0.996149	0.975066
E2R1C3	Proteasome subunit alpha type OS=Canis lupus familiaris PE=3 SV=2 - [E2R1C3_CANLF]	21.77	1	3	3	13	248	27.6481	7.10791	1.08793	1.0883	1.08812	1.04497	1.12299	1.08398	0.996198	0.975351
P18649	Apolipoprotein E OS=Canis lupus familiaris GN=APOE PE=1 SV=2 - [APOE_CANLF]	65.25	1	2	23	255	305	35.3321	5.23682	0.977291	0.782716	0.880004	0.933658	0.833099	0.883379	1.00384	0.976721
F1PXD6	Uncharacterized protein OS=Canis lupus familiaris GN=PRG4 PE=4 SV=2 - [F1PXD6_CANLF]	10.54	1	9	9	38	854	94.2901	9.64209	1.03146	0.993899	1.01268	1.0497	0.983289	1.0165	1.00377	0.977185
F1PSS8	Uncharacterized protein OS=Canis lupus familiaris GN=PROS1 PE=4 SV=2 - [F1PSS8_CANLF]	28.87	1	21	21	157	679	75.9506	5.59229	1.0213	1.01067	1.01598	1.02434	1.00094	1.01264	0.996705	0.978294
F6Y713	Alpha-1-acid glycoprotein OS=Canis lupus familiaris GN=ORM1 PE=3 SV=1 - [F6Y713_CANLF]	53.17	1	14	14	454	205	23.2906	5.59229	0.950411	0.972405	0.961408	0.9697	0.959405	0.964552	1.00327	0.980596
E2RT38	Uncharacterized protein OS=Canis lupus familiaris GN=MGAM PE=3 SV=2 - [E2RT38_CANLF]	36.33	4	58	58	365	1833	207.228	5.90967	1.03395	1.03725	1.0356	1.0331	1.03322	1.03316	0.99765	0.983777
E2R357	Uncharacterized protein OS=Canis lupus familiaris GN=SUN5 PE=4 SV=1 - [E2R357_CANLF]	1.92	1	1	1	2	365	41.66	8.73389	0.64825	0.594356	0.621303	0.660443	0.5795	0.619971	0.997857	0.984977
F1PDJ5	Apolipoprotein A-I OS=Canis lupus familiaris GN=APOA1 PE=3 SV=1 - [F1PDJ5_CANLF]	85.71	14	41	41	5742	266	30.1628	5.38916	1.06039	1.06416	1.06227	1.05845	1.06198	1.06021	0.998061	0.986164
J9P3L5	Uncharacterized protein OS=Canis lupus familiaris PE=4 SV=1 - [J9P3L5_CANLF]	30.61	1	1	3	73	147	15.5746	4.83057	1.05455	1.15127	1.10291	1.1053	1.10566	1.10548	1.00233	0.987083
E2RH18	Uncharacterized protein OS=Canis lupus familiaris GN=CFP PE=4 SV=1 - [E2RH18_CANLF]	9.05	1	3	3	13	464	50.5038	8.08936	1.04277	1.00003	1.0214	1.0673	0.979089	1.02319	1.00176	0.991003
O18840	Actin, cytoplasmic 1 OS=Canis lupus familiaris GN=ACTB PE=2 SV=3 - [ACTB_CANLF]	54.67	7	6	15	111	375	41.7097	5.47803	1.14459	1.12924	1.13692	1.12319	1.1544	1.13879	1.00165	0.991723
F1PL59	Scavenger receptor cysteine-rich type 1 protein M130 OS=Canis lupus familiaris GN=CD163 PE=4 SV=2 - [F1PL59_CANLF]	2.43	3	2	2	3	1110	120.023	5.73193	1.1845	1.14407	1.16429	1.16993	1.15703	1.16348	0.999305	0.993373
H9GWG4	Uncharacterized protein OS=Canis lupus familiaris GN=ITIH3 PE=4 SV=2 - [H9GWG4_CANLF]	29.21	2	21	21	176	890	99.6307	6.16357	1.02461	1.02501	1.02481	0.999985	1.05198	1.02598	1.00114	0.995213
E2R2F7	Uncharacterized protein OS=Canis lupus familiaris GN=SHBG PE=4 SV=1 - [E2R2F7_CANLF]	42.22	1	12	12	75	405	43.978	6.07471	1.00993	1.00465	1.00729	0.990449	1.02555	1.008	1.0007	0.998267
P33703	Beta-2-glycoprotein 1 OS=Canis lupus familiaris GN=APOH PE=2 SV=1 - [APOH_CANLF]	56.23	1	19	19	242	345	38.3777	8.1333	0.980206	0.966998	0.973602	0.984423	0.963656	0.97404	1.00045	1

## Sheet: 3h vs 0h
Accession	Description	Coverage	Proteins	Unique Peptides	Peptides	PSMs	AAs	MW [kDa]	calc. pI	0 h-1/REF	0 h-2/REF	Average 0 h	3 h-1/REF	3 h-2/REF	Average 3 h	3 h/0 h	Significance A
F1PGC3	Uncharacterized protein OS=Canis lupus familiaris GN=IFIT2 PE=4 SV=2 - [F1PGC3_CANLF]	3.63	3	2	2	11	468	54.0843	7.47412	0.375061	0.362432	0.368747	1.8263	1.55875	1.69252	4.58994	1.05278e-12
F6Y5M8	Uncharacterized protein OS=Canis lupus familiaris GN=LOC100856725 PE=4 SV=1 - [F6Y5M8_CANLF]	4.09	1	1	1	2	171	19.0208	6.52197	0.445658	0.462032	0.453845	1.43705	1.45065	1.44385	3.18138	7.34995e-08
F1Q0N9	Uncharacterized protein OS=Canis lupus familiaris GN=KRT19 PE=3 SV=1 - [F1Q0N9_CANLF]	8.52	25	2	5	9	399	43.8582	5.26221	0.73386	0.582668	0.658264	1.83628	2.04319	1.93973	2.94674	5.20778e-07
J9JHF7	Uncharacterized protein OS=Canis lupus familiaris GN=LOC100855540 PE=3 SV=1 - [J9JHF7_CANLF]	91.55	2	1	11	464	142	15.3689	8.06006	0.326931	0.4609	0.393916	1.17877	1.06606	1.12242	2.84938	1.18027e-06
F1PYZ1	Uncharacterized protein OS=Canis lupus familiaris GN=LOC485255 PE=3 SV=2 - [F1PYZ1_CANLF]	14.09	1	1	2	54	149	16.6116	7.1958	0.648158	0.677591	0.662875	2.28644	1.1704	1.72842	2.60746	9.10088e-06
E2R357	Uncharacterized protein OS=Canis lupus familiaris GN=SUN5 PE=4 SV=1 - [E2R357_CANLF]	1.92	1	1	1	2	365	41.66	8.73389	0.64825	0.594356	0.621303	1.50269	1.69343	1.59806	2.57211	1.22738e-05
P60529	Hemoglobin subunit alpha OS=Canis lupus familiaris GN=HBA PE=1 SV=1 - [HBA_CANLF]	92.2	3	1	11	608	141	15.2079	8.06006	0.436232	0.405718	0.420975	1.11383	1.0382	1.07601	2.55601	1.40659e-05
E2QW34	Proteasome subunit beta type OS=Canis lupus familiaris GN=PSMB2 PE=3 SV=1 - [E2QW34_CANLF]	5.47	1	1	1	3	201	22.7666	6.68311	0.564277	0.604285	0.584281	1.39577	1.2528	1.32429	2.26653	0.000161994
J9NU17	Uncharacterized protein OS=Canis lupus familiaris GN=MYO1A PE=3 SV=1 - [J9NU17_CANLF]	1.08	2	1	1	2	927	105.725	9.5249	0.433907	0.510199	0.472053	0.35518	1.65762	1.0064	2.13197	0.000499127
E2QYB2	Uncharacterized protein OS=Canis lupus familiaris PE=4 SV=2 - [E2QYB2_CANLF]	45.95	8	1	5	112	111	12.0179	5.99854	0.694794	0.597506	0.64615	1.32085	1.36749	1.34417	2.08028	0.000766407
P60524	Hemoglobin subunit beta OS=Canis lupus familiaris GN=HBB PE=1 SV=1 - [HBB_CANLF]	92.47	5	5	16	746	146	15.9864	8.04541	0.486537	0.462007	0.474272	0.977911	0.968176	0.973043	2.05166	0.000970817
E2RKW4	Uncharacterized protein OS=Canis lupus familiaris GN=CRISP2 PE=3 SV=2 - [E2RKW4_CANLF]	6.01	2	1	1	2	183	20.8112	7.7085	0.997922	0.901768	0.949845	1.71842	1.9951	1.85676	1.9548	0.00214665
J9P9B9	Uncharacterized protein OS=Canis lupus familiaris PE=4 SV=1 - [J9P9B9_CANLF]	19.05	1	1	2	43	126	13.5476	6.75635	0.728308	0.693958	0.711133	1.38028	1.29941	1.33985	1.8841	0.00380146
F1P8V6	Myoglobin OS=Canis lupus familiaris GN=MB PE=3 SV=1 - [F1P8V6_CANLF]	18.83	2	2	2	10	154	17.3261	7.78174	0.495684	0.687692	0.591688	1.20547	1.0099	1.10769	1.87208	0.00418627
F1PDY8	Uncharacterized protein OS=Canis lupus familiaris GN=CA2 PE=4 SV=2 - [F1PDY8_CANLF]	33.08	1	8	8	30	260	29.2417	7.18115	0.539863	0.588748	0.564305	0.975487	1.04465	1.01007	1.78993	0.00803369
E2R997	Uncharacterized protein OS=Canis lupus familiaris GN=PBLD PE=4 SV=2 - [E2R997_CANLF]	2.75	2	1	1	3	255	28.2147	7.10791	0.787609	0.715136	0.751372	1.30745	1.32779	1.31762	1.75362	0.0106708
F1PJ74	Apolipoprotein E OS=Canis lupus familiaris GN=APOE PE=3 SV=1 - [F1PJ74_CANLF]	61.92	5	2	23	261	323	37.2012	5.30029	0.651818	0.590629	0.621224	1.12355	0.982931	1.05324	1.69543	0.016711
J9NVE9	Serum amyloid A protein OS=Canis lupus familiaris GN=LOC102155886 PE=3 SV=1 - [J9NVE9_CANLF]	19.23	1	1	3	11	130	14.5032	9.23193	0.34888	0.503876	0.426378	0.698441	0.700425	0.699433	1.64041	0.0253315
E2R7A3	Uncharacterized protein OS=Canis lupus familiaris GN=CFI PE=3 SV=2 - [E2R7A3_CANLF]	36.11	1	3	18	116	565	62.9423	7.29834	0.769065	0.883716	0.82639	1.41815	1.21625	1.3172	1.59392	0.0357492
J9P5Z0	Myosin-1 OS=Canis lupus familiaris GN=MYH1 PE=4 SV=1 - [J9P5Z0_CANLF]	0.78	9	1	1	3	773	89.9375	5.52881	0.737265	0.972825	0.855045	1.42251	1.28947	1.35599	1.58587	0.0379196
F1P8A6	Uncharacterized protein OS=Canis lupus familiaris GN=VSIG4 PE=4 SV=2 - [F1P8A6_CANLF]	8.27	2	2	2	11	399	44.4324	6.82959	0.596898	0.690112	0.643505	1.03497	1	1.01749	1.58116	0.0392461
F1PIF2	Uncharacterized protein OS=Canis lupus familiaris GN=CTSZ PE=3 SV=2 - [F1PIF2_CANLF]	3.83	1	1	1	2	261	29.2696	6.26514	0.830488	0.880355	0.855422	1.4971	1.1864	1.34175	1.56852	0.0430233
E2RLF1	Uncharacterized protein OS=Canis lupus familiaris GN=PSAP PE=4 SV=1 - [E2RLF1_CANLF]	2.86	1	1	1	5	524	57.9448	5.05908	0.825076	0.75999	0.792533	1.26915	1.19992	1.23453	1.5577	0.0465243
P00011	Cytochrome c OS=Canis lupus familiaris GN=CYCS PE=1 SV=2 - [CYC_CANLF]	40.95	1	4	4	16	105	11.6251	9.5835	0.599554	0.65302	0.626287	1.01427	0.929207	0.971738	1.55158	0.0486202
F1P6H7	Fibronectin OS=Canis lupus familiaris GN=FN1 PE=4 SV=2 - [F1P6H7_CANLF]	48.15	2	1	81	864	2426	267.073	5.5542	1.72099	1.35801	1.5395	0.4084	0.700585	0.554493	0.360177	0.000333065
L7N0L9	Uncharacterized protein OS=Canis lupus familiaris PE=3 SV=1 - [L7N0L9_CANLF]	3.72	3	1	1	3	349	38.4703	7.44482	1.3768	1.30562	1.34121	0.60641	0.47512	0.540765	0.403193	0.0013702
Q0QEN2	ATP synthase subunit beta (Fragment) OS=Canis lupus familiaris GN=ATP5B PE=2 SV=1 - [Q0QEN2_CANLF]	7.17	2	2	2	3	321	34.6651	5.41455	1.25023	1.72826	1.48924	0.969604	0.284746	0.627175	0.421137	0.0022779
J9P992	Uncharacterized protein OS=Canis lupus familiaris GN=MYO18A PE=3 SV=1 - [J9P992_CANLF]	0.72	2	1	1	2	1945	219.253	6.15088	1.24395	1.40998	1.32696	0.591202	0.572072	0.581637	0.438322	0.00356725
J9NZW6	Uncharacterized protein OS=Canis lupus familiaris GN=APOF PE=4 SV=1 - [J9NZW6_CANLF]	6.94	1	1	1	2	288	31.5762	6.20166	1.2848	1.72853	1.50667	0.698254	0.671265	0.68476	0.454486	0.00527447
J9NYN2	Uncharacterized protein OS=Canis lupus familiaris GN=CSRP1 PE=4 SV=1 - [J9NYN2_CANLF]	7.77	1	1	1	2	193	20.6188	8.57275	1.61807	1.70062	1.65935	0.781302	0.76387	0.772586	0.465597	0.00679215
J9P8M2	Fibronectin OS=Canis lupus familiaris GN=FN1 PE=4 SV=1 - [J9P8M2_CANLF]	52.48	1	3	83	895	2256	248.986	6.13818	1.43402	1.48415	1.45908	0.703063	0.664332	0.683698	0.46858	0.00725422
J9PB81	Uncharacterized protein OS=Canis lupus familiaris GN=CTSG PE=3 SV=1 - [J9PB81_CANLF]	4.86	1	1	1	2	247	27.2892	11.7808	1.58057	1.52043	1.5505	0.756482	0.734911	0.745696	0.480939	0.00944323
J9NS29	Cystatin OS=Canis lupus familiaris GN=LOC607874 PE=3 SV=1 - [J9NS29_CANLF]	18.95	1	1	1	4	153	16.3785	9.31982	1.34016	1.49845	1.4193	0.7791	0.600516	0.689808	0.486018	0.0104819
E2QUU8	Uncharacterized protein OS=Canis lupus familiaris PE=4 SV=2 - [E2QUU8_CANLF]	13.79	1	1	2	46	145	15.6239	8.88037	1.45978	1.3383	1.39904	0.619248	0.754597	0.686922	0.490994	0.0115847
F1PNY4	Keratinocyte differentiation-associated protein OS=Canis lupus familiaris GN=KRTDAP PE=4 SV=2 - [F1PNY4_CANLF]	31.63	3	2	2	6	98	10.8588	9.5249	1.38157	1.37321	1.37739	0.641667	0.712819	0.677243	0.491687	0.0117451
F1PB77	Alpha-1,4 glucan phosphorylase OS=Canis lupus familiaris GN=PYGL PE=3 SV=2 - [F1PB77_CANLF]	1.26	2	1	1	2	870	99.8503	7.2251	1.31069	1.08672	1.1987	0.586318	0.604234	0.595276	0.496599	0.0129339
E2QXH0	Uncharacterized protein OS=Canis lupus familiaris GN=PLA1A PE=3 SV=2 - [E2QXH0_CANLF]	4.82	1	1	1	3	456	50.1087	7.73779	1.16902	1.44736	1.30819	0.828483	0.478915	0.653699	0.499696	0.0137304
E2RL75	Uncharacterized protein OS=Canis lupus familiaris GN=INTS4 PE=4 SV=1 - [E2RL75_CANLF]	1.24	1	1	1	3	964	108.197	6.49365	0.858958	1.12405	0.991504	0.439563	0.555116	0.497339	0.501601	0.0142388
C4MW55	Cytochrome c oxidase subunit 2 OS=Canis lupus familiaris GN=COX2 PE=3 SV=1 - [C4MW55_CANLF]	4.41	1	1	1	5	227	26.0561	4.729	1.14985	1.34714	1.2485	0.955405	0.389573	0.672489	0.53864	0.02734
E2R5H4	Uncharacterized protein OS=Canis lupus familiaris GN=ILK PE=4 SV=1 - [E2R5H4_CANLF]	5.31	1	2	2	3	452	51.3559	8.07471	1.39794	1.40917	1.40356	0.762729	0.775713	0.769221	0.548051	0.0317798
J9PBN6	Uncharacterized protein OS=Canis lupus familiaris GN=LOC611458 PE=4 SV=1 - [J9PBN6_CANLF]	60.76	1	4	79	1490	1478	165.846	6.62451	1.17563	1.38766	1.28164	0.719055	0.703475	0.711265	0.554963	0.0353655
E2R4H4	Uncharacterized protein OS=Canis lupus familiaris GN=PSMA5 PE=4 SV=2 - [E2R4H4_CANLF]	26.78	1	3	3	12	183	20.0219	4.729	1.33806	1.33858	1.33832	0.813207	0.692056	0.752632	0.562371	0.0395297
J9P4B4	Uncharacterized protein OS=Canis lupus familiaris GN=C1QA PE=4 SV=1 - [J9P4B4_CANLF]	14.77	1	2	2	6	264	27.7669	8.82178	1.24766	1.30178	1.27472	0.730056	0.741674	0.735865	0.577275	0.0489714
P02677	Fibrinogen beta chain (Fragment) OS=Canis lupus familiaris GN=FGB PE=1 SV=2 - [FIBB_CANLF]	35.48	1	1	1	19	31	3.72878	4.99561	0.816976	1.13539	0.976184	1.72703	1.27346	1.50025	1.53685	0.0540321
F1PMH6	Uncharacterized protein OS=Canis lupus familiaris GN=MRC1 PE=4 SV=2 - [F1PMH6_CANLF]	1.44	2	2	2	3	1455	165.602	6.50732	0.745176	0.957795	0.851485	1.29851	1.28734	1.29293	1.51844	0.0615748
F1PBT3	Fructose-bisphosphate aldolase OS=Canis lupus familiaris PE=3 SV=2 - [F1PBT3_CANLF]	6.99	7	4	4	7	701	74.8497	7.44482	1.10751	1.07571	1.09161	0.78248	0.519257	0.650869	0.596247	0.0631917
E2RB38	Uncharacterized protein OS=Canis lupus familiaris GN=TPM3 PE=3 SV=2 - [E2RB38_CANLF]	4.03	10	1	1	2	248	28.8527	4.75439	1.39698	1.4085	1.40274	0.820187	0.853118	0.836652	0.596442	0.0633514
F1P6P2	Transgelin OS=Canis lupus familiaris GN=TAGLN2 PE=3 SV=2 - [F1P6P2_CANLF]	17.09	1	3	3	5	199	22.3632	8.25049	1.29554	1.60013	1.44783	0.863547	0.871767	0.867657	0.599279	0.0657056
F1PS41	Uncharacterized protein OS=Canis lupus familiaris GN=IPO9 PE=4 SV=2 - [F1PS41_CANLF]	1.61	1	1	1	2	991	111.135	4.85596	1.38894	1.29119	1.34007	0.557507	1.05136	0.804432	0.600292	0.0665611
J9P5V6	Uncharacterized protein OS=Canis lupus familiaris GN=TLN1 PE=4 SV=1 - [J9P5V6_CANLF]	6.23	2	9	9	17	2425	257.416	6.56592	1.1593	1.47972	1.31951	0.867629	0.716946	0.792288	0.600442	0.0666878
J9NTJ3	Uncharacterized protein OS=Canis lupus familiaris GN=MTCL1 PE=4 SV=1 - [J9NTJ3_CANLF]	0.71	4	1	1	8	985	109.853	6.53662	0.629855	1.00895	0.819401	1.48469	0.979791	1.23224	1.50383	0.0682392
J9P590	Uncharacterized protein OS=Canis lupus familiaris PE=4 SV=1 - [J9P590_CANLF]	50	1	3	3	14	136	14.392	5.8208	0.949987	0.781818	0.865902	1.15507	1.42508	1.29008	1.48986	0.0752231
L7N0L4	Uncharacterized protein OS=Canis lupus familiaris PE=4 SV=1 - [L7N0L4_CANLF]	35.82	1	2	3	199	134	14.7043	8.26514	0.906704	0.867431	0.887068	1.28149	1.35021	1.31585	1.48337	0.0786865
F1Q0C1	Uncharacterized protein OS=Canis lupus familiaris GN=DOPEY1 PE=4 SV=2 - [F1Q0C1_CANLF]	0.41	2	1	1	3	2455	275.66	6.30322	0.73667	0.600845	0.668757	0.916318	1.05897	0.987645	1.47684	0.0823179
E2R5U8	Transthyretin OS=Canis lupus familiaris GN=TTR PE=3 SV=1 - [E2R5U8_CANLF]	71.43	2	10	10	91	147	15.8582	6.91748	0.81464	0.707352	0.760996	1.09917	1.14775	1.12346	1.4763	0.0826246
E2R6Z2	Uncharacterized protein OS=Canis lupus familiaris GN=PTPRS PE=4 SV=2 - [E2R6Z2_CANLF]	1.09	1	1	1	2	1921	210.505	7.76709	1.44242	1.20081	1.32161	0.897774	0.736391	0.817082	0.618246	0.0830129
F6Y4Y7	Uncharacterized protein OS=Canis lupus familiaris GN=TMF1 PE=4 SV=1 - [F6Y4Y7_CANLF]	0.55	1	1	1	2	1095	123.369	5.021	0.549896	1.15208	0.850986	1.46042	1.04989	1.25516	1.47494	0.0833992
F1PS30	alpha-1,2-Mannosidase OS=Canis lupus familiaris GN=MAN1A1 PE=3 SV=1 - [F1PS30_CANLF]	9.59	2	4	4	7	584	66.0596	6.37939	1.32819	1.22199	1.27509	0.881033	0.719004	0.800019	0.627421	0.0923953
J9JHZ3	Uncharacterized protein OS=Canis lupus familiaris GN=LOC476825 PE=3 SV=1 - [J9JHZ3_CANLF]	72.37	4	3	14	612	152	16.7166	8.01611	0.70899	0.656428	0.682709	0.993358	0.99289	0.993124	1.45468	0.0957936
F1PVR0	Uncharacterized protein OS=Canis lupus familiaris GN=MMP8 PE=3 SV=2 - [F1PVR0_CANLF]	4.2	1	2	2	8	476	54.237	6.34131	0.73298	0.700962	0.716971	0.974694	1.10865	1.04167	1.45288	0.0969733
E2R2K4	Uncharacterized protein OS=Canis lupus familiaris GN=RAP1B PE=4 SV=1 - [E2R2K4_CANLF]	6.52	2	1	1	2	184	20.8256	5.78271	1.15899	1.11483	1.13691	0.804832	0.653332	0.729082	0.641282	0.10786
J9PAA1	Uncharacterized protein OS=Canis lupus familiaris PE=3 SV=1 - [J9PAA1_CANLF]	21.81	12	4	4	14	243	27.3726	4.83057	1.21486	1.20817	1.21152	0.790266	0.769107	0.779686	0.643562	0.110554
F1PCG4	Uncharacterized protein OS=Canis lupus familiaris GN=PRDX2 PE=4 SV=2 - [F1PCG4_CANLF]	33.33	1	5	6	23	198	21.8841	5.42725	0.8086	0.66979	0.739195	1.0487	1.0693	1.059	1.43264	0.111146
Q9MZD3	Peptidyl-prolyl cis-trans isomerase (Fragment) OS=Canis lupus familiaris PE=2 SV=1 - [Q9MZD3_CANLF]	12.82	8	2	2	7	156	16.9224	8.1626	1.31323	1.31599	1.31461	0.810007	0.88501	0.847509	0.644684	0.111896
F1PN38	Uncharacterized protein OS=Canis lupus familiaris GN=BIRC6 PE=4 SV=2 - [F1PN38_CANLF]	0.13	1	1	1	3	4755	520.21	6.04932	0.76234	0.82278	0.79256	1.13	1.13704	1.13352	1.4302	0.112968
F6UMP8	Uncharacterized protein OS=Canis lupus familiaris GN=LOC611458 PE=4 SV=1 - [F6UMP8_CANLF]	57.33	1	1	76	1434	1481	166.198	6.65381	1.23039	1.2385	1.23445	0.871472	0.725035	0.798254	0.646649	0.114272
F2Z4N7	Uncharacterized protein OS=Canis lupus familiaris GN=ACTC1 PE=3 SV=1 - [F2Z4N7_CANLF]	38.73	5	3	11	60	377	41.9919	5.38916	1.38395	1.06448	1.22422	0.840874	0.748812	0.794843	0.649267	0.117487
F1Q432	Uncharacterized protein OS=Canis lupus familiaris GN=TNXB PE=4 SV=2 - [F1Q432_CANLF]	0.46	2	2	2	3	3874	418.736	5.50342	1.34917	1.18586	1.26752	0.937772	0.71194	0.824856	0.650765	0.119352
J9P4E8	Uncharacterized protein OS=Canis lupus familiaris PE=4 SV=1 - [J9P4E8_CANLF]	66.37	6	3	5	110	113	12.4501	8.32373	1.19108	1.22581	1.20845	0.728537	0.850567	0.789552	0.653362	0.12263
J9JHE6	Uncharacterized protein OS=Canis lupus familiaris GN=DNAH10 PE=4 SV=1 - [J9JHE6_CANLF]	0.65	3	2	2	3	4028	464.092	6.03662	0.723259	1.24966	0.986457	1.97229	0.804578	1.38843	1.40749	0.131306
F1PH83	Uncharacterized protein OS=Canis lupus familiaris GN=COG7 PE=4 SV=2 - [F1PH83_CANLF]	1.46	2	1	1	18	687	77.2246	5.10986	1.22111	1.40482	1.31296	0.94993	0.787976	0.868953	0.661825	0.133706
J9NTU0	Uncharacterized protein OS=Canis lupus familiaris PE=3 SV=1 - [J9NTU0_CANLF]	3.43	6	1	1	2	321	34.6293	7.81104	0.96462	0.995441	0.98003	0.625022	0.673266	0.649144	0.662371	0.134441
E2RM78	Uncharacterized protein OS=Canis lupus familiaris GN=ISLR PE=4 SV=2 - [E2RM78_CANLF]	3.28	1	1	1	4	488	51.6722	5.2876	1.18026	1.19161	1.18593	0.811353	0.760736	0.786044	0.662808	0.135031
E2RC23	Uncharacterized protein OS=Canis lupus familiaris GN=PCOLCE PE=4 SV=1 - [E2RC23_CANLF]	8.08	1	2	2	2	458	48.5552	7.09326	1.05287	1.52104	1.28695	1.06669	0.643948	0.855317	0.664606	0.137477
F1PL59	Scavenger receptor cysteine-rich type 1 protein M130 OS=Canis lupus familiaris GN=CD163 PE=4 SV=2 - [F1PL59_CANLF]	2.43	3	2	2	3	1110	120.023	5.73193	1.1845	1.14407	1.16429	0.789527	0.76497	0.777248	0.667574	0.141573
P52784	ATP-dependent 6-phosphofructokinase, muscle type OS=Canis lupus familiaris GN=PFKM PE=2 SV=2 - [PFKAM_CANLF]	2.17	2	1	1	2	782	85.5066	8.08936	0.729736	1.33088	1.03031	0.517757	0.871883	0.69482	0.674381	0.15125
E2QUY2	Uncharacterized protein OS=Canis lupus familiaris GN=ABRACL PE=4 SV=1 - [E2QUY2_CANLF]	16.05	1	1	1	3	81	9.05486	6.29053	1.24124	1.52428	1.38276	0.936139	0.940734	0.938437	0.67867	0.157547
F1PMS8	Uncharacterized protein OS=Canis lupus familiaris GN=NCAM1 PE=4 SV=2 - [F1PMS8_CANLF]	14.1	6	7	7	7	709	78.3852	4.94482	1.31727	0.91563	1.11645	0.682932	0.836956	0.759944	0.680678	0.160549
F1PBL4	Fibrinogen alpha chain OS=Canis lupus familiaris GN=FGA PE=4 SV=1 - [F1PBL4_CANLF]	37.33	5	34	34	389	892	96.5827	6.1001	0.547022	0.567392	0.557207	0.783585	0.747394	0.765489	1.3738	0.163356
E2RI99	Signal transducer and activator of transcription OS=Canis lupus familiaris GN=STAT1 PE=3 SV=2 - [E2RI99_CANLF]	0.93	2	1	1	18	750	87.2265	6.12549	0.705884	0.978796	0.84234	1.34925	0.963311	1.15628	1.3727	0.164505
F1PH61	Uncharacterized protein OS=Canis lupus familiaris PE=4 SV=2 - [F1PH61_CANLF]	33.09	1	3	3	42	136	14.5432	5.75732	0.872713	0.873202	0.872958	1.22206	1.17203	1.19705	1.37125	0.166029
E2RIG8	Uncharacterized protein OS=Canis lupus familiaris GN=ARL5B PE=3 SV=2 - [E2RIG8_CANLF]	4.44	1	1	1	3	180	20.4923	6.52197	0.903749	0.835576	0.869663	1.23971	1.14368	1.1917	1.3703	0.167048
J9P5S6	Uncharacterized protein OS=Canis lupus familiaris GN=LOC490399 PE=4 SV=1 - [J9P5S6_CANLF]	16.87	2	7	7	26	498	54.0562	5.5542	0.822155	0.933128	0.877642	1.24173	1.16349	1.20261	1.37028	0.167069
F1P865	Uncharacterized protein OS=Canis lupus familiaris GN=SFXN4 PE=4 SV=2 - [F1P865_CANLF]	6.11	1	1	1	2	311	35.5138	9.39307	0.407826	1.35218	0.880004	1.70862	0.696605	1.20261	1.3666	0.171025
E2QSF4	Uncharacterized protein OS=Canis lupus familiaris GN=TUBB PE=3 SV=1 - [E2QSF4_CANLF]	7.21	6	1	2	4	444	49.639	4.89404	1.29803	1.20326	1.25064	0.805855	0.920184	0.86302	0.690061	0.175025
F1PTS8	Uncharacterized protein OS=Canis lupus familiaris GN=KRT6A PE=3 SV=1 - [F1PTS8_CANLF]	12.08	21	3	7	24	571	60.6331	8.1626	1.16989	1.24052	1.2052	0.879711	0.791636	0.835673	0.693388	0.180336
F1Q117	Uncharacterized protein OS=Canis lupus familiaris GN=ATRN PE=4 SV=2 - [F1Q117_CANLF]	9.6	2	13	13	29	1417	156.901	7.38623	0.865307	0.831865	0.848586	1.12367	1.18127	1.15247	1.35811	0.180468
E2R8C5	Uncharacterized protein OS=Canis lupus familiaris GN=IGLV2-33 PE=4 SV=2 - [E2R8C5_CANLF]	12.9	1	1	1	6	124	13.0662	5.09717	1.21072	1.20713	1.20893	1.0012	0.677882	0.839542	0.694452	0.182054
F1PGS2	Fibrinogen beta chain OS=Canis lupus familiaris GN=FGB PE=4 SV=2 - [F1PGS2_CANLF]	70.47	2	29	29	274	491	55.8163	8.1626	0.564064	0.574771	0.569417	0.791123	0.746456	0.768789	1.35013	0.189741
F1PGM9	Uncharacterized protein OS=Canis lupus familiaris GN=C4BPA PE=4 SV=2 - [F1PGM9_CANLF]	49.81	1	22	22	310	514	57.9211	6.82959	0.908848	0.915916	0.912382	1.22674	1.23334	1.23004	1.34816	0.192099
J9NYI6	Uncharacterized protein OS=Canis lupus familiaris GN=LRRIQ1 PE=4 SV=1 - [J9NYI6_CANLF]	0.59	1	1	1	3	1689	196.218	6.31592	0.4441	0.643647	0.543874	0.311235	0.453112	0.382173	0.702688	0.195669
F1P8G0	Fibrinogen gamma chain OS=Canis lupus familiaris GN=FGG PE=4 SV=2 - [F1P8G0_CANLF]	59.5	2	25	25	306	437	49.2859	6.12549	0.639198	0.600235	0.619716	0.814986	0.851791	0.833389	1.34479	0.19618
F1PKI5	Uncharacterized protein OS=Canis lupus familiaris PE=4 SV=2 - [F1PKI5_CANLF]	71.07	2	1	5	119	121	13.2666	6.62451	1.20744	0.799211	1.00333	0.94708	1.74564	1.34636	1.3419	0.199743
E2RRN8	Uncharacterized protein OS=Canis lupus familiaris GN=VASN PE=4 SV=1 - [E2RRN8_CANLF]	7.14	1	4	4	11	672	71.4246	7.75244	1.17354	1.25648	1.21501	0.851541	0.867569	0.859555	0.707447	0.203794
L7N0E7	Uncharacterized protein OS=Canis lupus familiaris GN=LOC612180 PE=4 SV=1 - [L7N0E7_CANLF]	31.03	1	1	3	53	145	15.2555	5.35107	1.19143	1.33694	1.26419	0.957104	0.845269	0.901187	0.712859	0.213258
J9NWQ5	Uncharacterized protein OS=Canis lupus familiaris PE=4 SV=1 - [J9NWQ5_CANLF]	18.06	5	2	2	4	144	16.2065	4.28467	1.25528	1.4574	1.35634	1.0086	0.927129	0.967863	0.713585	0.214546
F6X870	Uncharacterized protein OS=Canis lupus familiaris GN=PAM PE=4 SV=1 - [F6X870_CANLF]	4.09	2	2	2	3	807	89.4679	6.21436	1.31355	1.38042	1.34699	0.74367	1.18338	0.963526	0.715319	0.217638
F1PF03	Receptor protein-tyrosine kinase OS=Canis lupus familiaris GN=EGFR PE=3 SV=2 - [F1PF03_CANLF]	1.53	1	1	1	2	1180	131.445	6.91748	1.12969	1.23185	1.18077	0.819701	0.878199	0.84895	0.718978	0.224244
J9NYY8	Uncharacterized protein OS=Canis lupus familiaris PE=4 SV=1 - [J9NYY8_CANLF]	73.2	1	2	4	300	97	10.5642	7.95752	0.896264	0.919801	0.908033	1.24673	1.15574	1.20124	1.3229	0.224534
F1PQU0	Uncharacterized protein OS=Canis lupus familiaris PE=4 SV=2 - [F1PQU0_CANLF]	32.14	1	2	3	53	140	14.8592	7.79639	1.12576	1.14971	1.13773	0.869071	0.784857	0.826964	0.726851	0.238824
J9NXX1	Uncharacterized protein OS=Canis lupus familiaris GN=ZBED8 PE=4 SV=1 - [J9NXX1_CANLF]	1.01	3	1	1	3	594	68.0356	6.41748	0.849819	0.87168	0.86075	1.1799	1.07693	1.12842	1.31097	0.241381
P19540	Coagulation factor IX OS=Canis lupus familiaris GN=F9 PE=1 SV=1 - [FA9_CANLF]	23.23	2	10	10	43	452	50.7948	6.17627	0.858902	0.893327	0.876115	1.11708	1.17898	1.14803	1.31037	0.242265
E2RMN2	Proteasome subunit alpha type OS=Canis lupus familiaris GN=PSMA6 PE=3 SV=1 - [E2RMN2_CANLF]	29.27	1	6	6	16	246	27.3678	6.75635	0.794303	0.770096	0.782199	0.942025	1.10395	1.02299	1.30784	0.245984
H9GWY3	Uncharacterized protein OS=Canis lupus familiaris GN=ITIH4 PE=4 SV=2 - [H9GWY3_CANLF]	51.59	2	44	44	668	911	100.736	7.32764	0.917447	0.910812	0.91413	1.20336	1.17012	1.18674	1.29822	0.260544
P12278	Apolipoprotein C-II OS=Canis lupus familiaris GN=APOC2 PE=1 SV=1 - [APOC2_CANLF]	41.58	2	6	6	92	101	11.2196	4.88135	0.848836	0.867527	0.858181	1.11016	1.1179	1.11403	1.29813	0.260686
F1PSX2	Uncharacterized protein OS=Canis lupus familiaris PE=4 SV=2 - [F1PSX2_CANLF]	96.23	3	1	9	1483	106	11.1575	7.86963	1.18711	1.13413	1.16062	0.767045	0.947539	0.857292	0.738653	0.261589
F1PQN5	Uncharacterized protein OS=Canis lupus familiaris GN=CFL1 PE=3 SV=2 - [F1PQN5_CANLF]	30.72	5	3	3	10	166	18.4877	8.08936	1.22411	1.30923	1.26667	0.939332	0.938546	0.938939	0.741265	0.266773
E2RNJ1	Uncharacterized protein OS=Canis lupus familiaris GN=LAMP2 PE=4 SV=2 - [E2RNJ1_CANLF]	5.11	2	2	2	8	411	45.1065	6.66846	0.975777	0.899607	0.937692	0.731577	0.660218	0.695898	0.742139	0.268518
J9P6T3	Uncharacterized protein OS=Canis lupus familiaris GN=PLTP PE=4 SV=1 - [J9P6T3_CANLF]	29.49	2	9	9	31	495	54.6636	7.21045	1.15335	1.20761	1.18048	0.89171	0.866305	0.879007	0.744617	0.2735
F1PZR2	Uncharacterized protein OS=Canis lupus familiaris GN=WRN PE=4 SV=2 - [F1PZR2_CANLF]	0.52	1	1	1	2	1336	152.094	6.59521	0.688987	0.629243	0.659115	0.466856	0.516064	0.49146	0.745636	0.275561
F1P9M6	Uncharacterized protein OS=Canis lupus familiaris PE=4 SV=2 - [F1P9M6_CANLF]	14.14	1	1	1	7	99	10.6431	6.48096	1.11005	1.49909	1.30457	1.05212	0.896188	0.974153	0.746725	0.277773
P81709	Lysozyme C, spleen isozyme OS=Canis lupus familiaris PE=1 SV=1 - [LYSC2_CANLF]	18.46	2	2	2	4	130	14.5692	8.80713	0.826029	0.795513	0.810771	0.91834	1.16855	1.04344	1.28698	0.278457
L7N0F1	Uncharacterized protein OS=Canis lupus familiaris GN=LOC100687054 PE=4 SV=1 - [L7N0F1_CANLF]	35.85	1	1	7	853	212	22.2162	8.73389	1.11755	1.19885	1.1582	0.843744	0.887048	0.865396	0.747189	0.27872
F1PNY2	Uncharacterized protein OS=Canis lupus familiaris PE=4 SV=2 - [F1PNY2_CANLF]	51.26	6	7	9	205	238	26.2349	5.80811	0.919497	0.955901	0.937699	1.20637	1.20407	1.20522	1.28529	0.281226
F1PCE8	Uncharacterized protein OS=Canis lupus familiaris GN=LOC475521 PE=3 SV=1 - [F1PCE8_CANLF]	4.07	2	1	1	14	246	26.2609	8.07471	1.04666	1.01239	1.02953	1.28653	1.35979	1.32316	1.28521	0.281362
Q3HTU6	Interleukin 18 binding protein OS=Canis lupus familiaris PE=2 SV=1 - [Q3HTU6_CANLF]	10.26	2	1	1	2	117	12.9935	6.91748	0.854018	0.795567	0.824792	1.05795	1.06015	1.05905	1.28402	0.283324
J9NVC6	Uncharacterized protein OS=Canis lupus familiaris PE=4 SV=1 - [J9NVC6_CANLF]	33.71	2	17	19	1030	620	67.6004	5.31299	0.905943	0.922659	0.914301	1.20165	1.14547	1.17356	1.28356	0.284098
E2R833	Uncharacterized protein OS=Canis lupus familiaris GN=LRG1 PE=4 SV=2 - [E2R833_CANLF]	53.6	2	17	17	226	347	38.025	6.58057	0.850092	0.872219	0.861155	1.143	1.0665	1.10475	1.28287	0.285239
A9QU57	CD14 antigen (Fragment) OS=Canis lupus familiaris GN=CD14 PE=2 SV=1 - [A9QU57_CANLF]	43.4	1	3	3	12	106	11.2929	9.27588	0.862789	0.820458	0.841623	1.10938	1.04918	1.07928	1.28238	0.28606
P05123	Creatine kinase M-type OS=Canis lupus familiaris GN=CKM PE=1 SV=3 - [KCRM_CANLF]	51.71	2	14	14	62	381	43.1259	7.25439	0.577081	0.511617	0.544349	0.674812	0.718304	0.696558	1.27962	0.290716
L7N0I0	Uncharacterized protein OS=Canis lupus familiaris PE=4 SV=1 - [L7N0I0_CANLF]	63.77	1	3	5	130	69	7.88686	9.43701	0.932521	0.930924	0.931722	1.22865	1.15253	1.19059	1.27784	0.293746
O18840	Actin, cytoplasmic 1 OS=Canis lupus familiaris GN=ACTB PE=2 SV=3 - [ACTB_CANLF]	54.67	7	6	15	111	375	41.7097	5.47803	1.14459	1.12924	1.13692	0.906252	0.813603	0.859928	0.756369	0.297744
Q38J75	Coagulation factor VII OS=Canis lupus familiaris PE=2 SV=1 - [Q38J75_CANLF]	18.83	3	8	8	14	446	49.684	5.61768	0.866708	0.870253	0.868481	1.12167	1.09196	1.10682	1.27443	0.299617
E2R302	Uncharacterized protein OS=Canis lupus familiaris GN=ERAP1 PE=4 SV=1 - [E2R302_CANLF]	2.76	1	3	3	3	942	107.196	5.68115	1.22096	1.17836	1.19966	0.888045	0.92926	0.908653	0.757427	0.299975
E2R0T6	Uncharacterized protein OS=Canis lupus familiaris GN=HSPA8 PE=3 SV=1 - [E2R0T6_CANLF]	8.82	7	2	4	5	646	70.8542	5.51611	1.28381	1.1225	1.20316	0.79227	1.03112	0.911695	0.757753	0.300665
J9P5C8	Uncharacterized protein OS=Canis lupus familiaris PE=4 SV=1 - [J9P5C8_CANLF]	55.56	1	3	5	135	117	12.8654	7.82568	0.873583	0.882475	0.878029	1.14219	1.09459	1.11839	1.27375	0.3008
F1PYU9	Keratin, type I cytoskeletal 10 OS=Canis lupus familiaris GN=KRT10 PE=3 SV=2 - [F1PYU9_CANLF]	23.24	20	9	12	44	568	57.6501	5.14795	1.19598	1.19688	1.19643	0.913049	0.901421	0.907235	0.758285	0.301792
E2RRQ0	Uncharacterized protein OS=Canis lupus familiaris GN=SON PE=4 SV=1 - [E2RRQ0_CANLF]	0.58	2	1	1	3	2415	262.267	5.59229	1.34658	0.948704	1.14764	0.836323	0.914939	0.875631	0.762984	0.311828
F1PYM4	Uncharacterized protein OS=Canis lupus familiaris GN=IGFALS PE=4 SV=2 - [F1PYM4_CANLF]	33.18	1	17	17	80	654	70.279	7.54736	1.01837	1.07682	1.04759	0.831149	0.769921	0.800535	0.764165	0.314376
J9P0R6	Uncharacterized protein OS=Canis lupus familiaris GN=MPO PE=4 SV=1 - [J9P0R6_CANLF]	5.48	2	3	3	5	657	74.027	9.68604	0.96796	1.07576	1.02186	0.828431	0.734201	0.781316	0.764601	0.315318
P81546	Metalloproteinase inhibitor 1 OS=Canis lupus familiaris GN=TIMP1 PE=1 SV=2 - [TIMP1_CANLF]	8.7	3	2	2	7	207	22.8373	8.44092	0.911737	1.12729	1.01951	1.40873	1.16956	1.28915	1.26447	0.317311
F1PE38	Uncharacterized protein OS=Canis lupus familiaris GN=CDH13 PE=4 SV=2 - [F1PE38_CANLF]	6.09	1	2	2	4	608	66.4348	4.95752	1.11162	1.17849	1.14506	0.994876	0.758255	0.876565	0.76552	0.317311
E2RI13	Uncharacterized protein OS=Canis lupus familiaris GN=GPBP1 PE=4 SV=2 - [E2RI13_CANLF]	3.96	2	1	1	2	480	54.1474	6.90283	1.4907	1.16281	1.32675	0.807185	1.22604	1.01661	0.766241	0.318876
L7N0F2	Uncharacterized protein OS=Canis lupus familiaris PE=4 SV=1 - [L7N0F2_CANLF]	80.95	2	1	9	1415	126	13.2195	7.29834	1.17871	1.08053	1.12962	0.784299	0.948531	0.866415	0.766994	0.320517
E2RT65	Uncharacterized protein OS=Canis lupus familiaris GN=PGAM1 PE=3 SV=2 - [E2RT65_CANLF]	5.51	1	1	1	2	254	28.8038	7.18115	0.848779	0.923251	0.886015	1.13179	1.10576	1.11878	1.26271	0.32053
E2QUY1	Uncharacterized protein OS=Canis lupus familiaris GN=RASA3 PE=4 SV=2 - [E2QUY1_CANLF]	0.72	1	1	1	9	834	95.6972	7.43018	0.876192	0.88068	0.878436	1.17161	1.04486	1.10824	1.2616	0.322562
H9GWI3	Uncharacterized protein OS=Canis lupus familiaris GN=AHNAK2 PE=4 SV=2 - [H9GWI3_CANLF]	10.46	2	3	3	5	1415	147.607	6.27783	1.09514	0.959369	1.02725	0.623108	0.955709	0.789409	0.768465	0.323731
F1PL50	Uncharacterized protein OS=Canis lupus familiaris PE=4 SV=2 - [F1PL50_CANLF]	24.08	1	2	2	25	191	20.2628	6.06201	1.26222	1.15212	1.20717	0.913273	0.943331	0.928302	0.768993	0.324888
F1PH86	Uncharacterized protein OS=Canis lupus familiaris GN=SERPINA3 PE=3 SV=2 - [F1PH86_CANLF]	54.39	2	19	20	303	421	47.1104	6.11279	0.781516	0.838499	0.810007	1.03635	1.00151	1.01893	1.25793	0.329383
Q6QNF3	Platelet-derived growth factor receptor beta OS=Canis lupus familiaris GN=PDGFRB PE=2 SV=1 - [PGFRB_CANLF]	5.17	2	4	4	8	1103	122.944	5.10986	1.00793	1.16613	1.08703	0.78197	0.899959	0.840964	0.773636	0.335146
E2R1C3	Proteasome subunit alpha type OS=Canis lupus familiaris PE=3 SV=2 - [E2R1C3_CANLF]	21.77	1	3	3	13	248	27.6481	7.10791	1.08793	1.0883	1.08812	0.885875	0.815201	0.850538	0.781661	0.353214
E2R8Z5	Uncharacterized protein OS=Canis lupus familiaris GN=KRT5 PE=3 SV=2 - [E2R8Z5_CANLF]	11.74	19	2	7	28	596	62.6911	7.72314	1.11893	1.04275	1.08084	0.869055	0.821713	0.845384	0.782153	0.354334
F1P903	Uncharacterized protein OS=Canis lupus familiaris GN=C1R PE=3 SV=2 - [F1P903_CANLF]	41.13	5	27	27	166	705	80.0791	6.23975	0.893727	0.922994	0.908361	1.13545	1.11715	1.1263	1.23993	0.36446
P01785	Ig heavy chain V region MOO OS=Canis lupus familiaris PE=1 SV=1 - [HV02_CANLF]	23.08	1	2	2	33	117	12.6952	4.71631	1.21781	1.09817	1.15799	0.844226	0.982038	0.913132	0.788549	0.369048
Q6TN20	Cathelicidin OS=Canis lupus familiaris GN=CAMP PE=2 SV=1 - [Q6TN20_CANLF]	31.4	1	5	5	11	172	19.4252	8.42627	0.904242	1.14329	1.02377	0.83637	0.77828	0.807325	0.788582	0.369125
F1PCE5	Uncharacterized protein OS=Canis lupus familiaris GN=SERPINA1 PE=3 SV=2 - [F1PCE5_CANLF]	39.62	3	3	19	742	419	46.733	6.17627	1.24891	1.14644	1.19767	0.963666	0.927371	0.945519	0.789462	0.371169
E2RP87	Uncharacterized protein OS=Canis lupus familiaris GN=LOC478984 PE=4 SV=1 - [E2RP87_CANLF]	3.21	1	1	1	2	249	27.9924	9.15869	0.61879	0.696009	0.657399	0.783873	0.841261	0.812567	1.23603	0.372414
F6XZU1	Uncharacterized protein OS=Canis lupus familiaris GN=PGLYRP2 PE=4 SV=1 - [F6XZU1_CANLF]	31.67	2	10	10	20	562	61.0583	7.18115	1.13265	1.06862	1.10063	0.867549	0.874337	0.870943	0.79131	0.375477
F6Y713	Alpha-1-acid glycoprotein OS=Canis lupus familiaris GN=ORM1 PE=3 SV=1 - [F6Y713_CANLF]	53.17	1	14	14	454	205	23.2906	5.59229	0.950411	0.972405	0.961408	1.22521	1.14725	1.18623	1.23384	0.376943
E2REU6	Uncharacterized protein OS=Canis lupus familiaris GN=KRT18 PE=3 SV=2 - [E2REU6_CANLF]	3.58	13	1	2	3	447	49.7624	5.52881	0.835018	0.810355	0.822686	0.988946	1.03558	1.01226	1.23043	0.384083
J9JHH5	Uncharacterized protein OS=Canis lupus familiaris GN=JCHAIN PE=4 SV=1 - [J9JHH5_CANLF]	47.17	1	7	7	79	159	18.2399	4.81787	0.977357	0.969652	0.973505	1.21578	1.17978	1.19778	1.23038	0.384197
L7N0K2	Uncharacterized protein OS=Canis lupus familiaris PE=4 SV=1 - [L7N0K2_CANLF]	57.85	1	3	5	148	121	13.4906	9.05615	1.20863	1.18858	1.1986	0.891898	1.02196	0.956929	0.798369	0.392124
J9P9J6	Uncharacterized protein OS=Canis lupus familiaris PE=4 SV=1 - [J9P9J6_CANLF]	53.85	1	14	14	220	338	36.9543	5.50342	0.963743	0.965154	0.964449	1.17931	1.18529	1.1823	1.22588	0.393776
H9GWR0	Uncharacterized protein OS=Canis lupus familiaris PE=4 SV=2 - [H9GWR0_CANLF]	36	2	1	3	88	125	12.9722	5.89697	1.12969	1.14092	1.13531	0.94216	0.87223	0.907195	0.799076	0.393806
J9P455	Uncharacterized protein OS=Canis lupus familiaris PE=4 SV=1 - [J9P455_CANLF]	38.1	5	1	4	88	126	13.5708	8.55811	0.992728	0.871493	0.93211	1.11486	1.16781	1.14133	1.22446	0.396835
F1PG16	Uncharacterized protein OS=Canis lupus familiaris GN=CD5L PE=4 SV=2 - [F1PG16_CANLF]	59.71	3	19	19	269	340	37.6728	5.69385	0.947779	0.951673	0.949726	1.19087	1.13409	1.16248	1.22402	0.397795
F1PYX9	Uncharacterized protein OS=Canis lupus familiaris GN=SERPING1 PE=3 SV=2 - [F1PYX9_CANLF]	21.97	1	11	11	146	487	53.4223	5.87158	0.933985	0.907106	0.920546	1.12804	1.12513	1.12658	1.22382	0.398219
F1P7J4	Uncharacterized protein OS=Canis lupus familiaris GN=C5 PE=4 SV=2 - [F1P7J4_CANLF]	45.47	1	63	63	456	1689	188.548	6.59521	0.92601	0.937258	0.931634	1.14921	1.12962	1.13941	1.22303	0.399944
E2R3V1	Uncharacterized protein OS=Canis lupus familiaris GN=FCRL4 PE=4 SV=1 - [E2R3V1_CANLF]	2.91	1	1	1	6	516	56.5599	7.15186	1.13256	1.13076	1.13166	0.896174	0.923396	0.909785	0.803939	0.405459
E2RS80	Uncharacterized protein OS=Canis lupus familiaris GN=C2 PE=3 SV=2 - [E2RS80_CANLF]	55.36	2	40	64	698	1268	141.215	7.32764	0.944636	0.963053	0.953845	1.18685	1.13936	1.1631	1.21939	0.407924
J9NTL7	Uncharacterized protein OS=Canis lupus familiaris GN=LOC478952 PE=4 SV=1 - [J9NTL7_CANLF]	52.15	3	55	55	459	1233	139.641	6.49365	0.952855	0.938487	0.945671	1.15662	1.14402	1.15032	1.21641	0.414533
E2RLN1	Uncharacterized protein OS=Canis lupus familiaris GN=SERPIND1 PE=3 SV=1 - [E2RLN1_CANLF]	47.18	2	22	22	232	496	56.6357	6.26514	0.893591	0.921293	0.907442	1.10752	1.09778	1.10265	1.21512	0.417416
F1PB85	Uncharacterized protein OS=Canis lupus familiaris GN=SERPINA7 PE=3 SV=2 - [F1PB85_CANLF]	33.57	2	12	12	65	414	46.5041	7.04932	0.825873	0.878685	0.852279	1.05104	1.01591	1.03348	1.2126	0.423097
F1PEM7	Uncharacterized protein OS=Canis lupus familiaris GN=IGFBP2 PE=4 SV=1 - [F1PEM7_CANLF]	17.81	1	4	4	14	247	27.0821	7.06396	1.16534	1.0989	1.13212	0.908534	0.928217	0.918376	0.811199	0.423103
D2K841	C-X-C motif chemokine OS=Canis lupus familiaris PE=2 SV=1 - [D2K841_CANLF]	27.12	2	2	2	12	118	12.9219	9.18799	0.949969	0.96785	0.958909	1.08424	1.23918	1.16171	1.21149	0.425615
F1Q421	Plasminogen OS=Canis lupus familiaris GN=PLG PE=3 SV=2 - [F1Q421_CANLF]	58.37	7	34	41	505	812	91.1103	7.07861	0.940895	0.972567	0.956731	1.17725	1.13964	1.15844	1.21083	0.427119
F6X5M3	Uncharacterized protein OS=Canis lupus familiaris GN=CLTB PE=4 SV=1 - [F6X5M3_CANLF]	3.93	1	1	1	6	229	25.1452	4.64014	0.332605	0.5499	0.441252	0.313735	0.40425	0.358993	0.813577	0.428944
E2RE76	Apolipoprotein A-IV OS=Canis lupus familiaris GN=APOA4 PE=3 SV=2 - [APOA4_CANLF]	61.9	1	27	27	437	378	42.5099	6.0874	1.01919	0.996977	1.00808	1.24188	1.18622	1.21405	1.20432	0.442189
F1PSS2	Uncharacterized protein OS=Canis lupus familiaris GN=THBS4 PE=4 SV=2 - [F1PSS2_CANLF]	5.84	2	4	4	6	873	96.1207	4.61475	1.12694	1.08228	1.10461	0.898076	0.911495	0.904786	0.819098	0.442615
J9PAD4	Uncharacterized protein OS=Canis lupus familiaris PE=4 SV=1 - [J9PAD4_CANLF]	36	2	1	3	73	125	13.0283	5.89697	1.12451	1.17166	1.14809	0.980649	0.903782	0.942215	0.820684	0.446572
F1PF90	Uncharacterized protein OS=Canis lupus familiaris PE=4 SV=2 - [F1PF90_CANLF]	29.5	1	5	5	22	139	14.8584	5.37646	0.974569	0.893657	0.934113	1.13074	1.11012	1.12043	1.19946	0.453681
F1PKX3	Uncharacterized protein OS=Canis lupus familiaris GN=F13A1 PE=4 SV=2 - [F1PKX3_CANLF]	35.06	1	21	21	68	733	83.3351	6.20166	1.05496	1.12437	1.08966	0.924221	0.875202	0.899711	0.825677	0.459104
F1PYL6	Uncharacterized protein OS=Canis lupus familiaris GN=FCMR PE=4 SV=2 - [F1PYL6_CANLF]	2.68	1	1	1	2	410	45.4214	9.26123	1.20515	0.937543	1.07134	0.730667	1.03877	0.88472	0.825804	0.459424
J9P732	Uncharacterized protein OS=Canis lupus familiaris GN=S100A9 PE=3 SV=1 - [J9P732_CANLF]	8.85	1	2	2	3	192	21.4315	6.45557	0.980836	0.920314	0.950575	0.657743	0.912556	0.785149	0.825973	0.459852
F1PZC6	Uncharacterized protein OS=Canis lupus familiaris GN=HRG PE=4 SV=2 - [F1PZC6_CANLF]	27.19	1	15	15	417	537	59.995	7.26904	1.07444	1.11761	1.09603	0.926355	0.887439	0.906897	0.82744	0.463558
Q8MJD1	Neutrophil elastase OS=Canis lupus familiaris GN=ELANE PE=2 SV=1 - [Q8MJD1_CANLF]	4.96	1	1	1	4	282	29.9016	10.6528	1.08113	0.963163	1.02215	0.823861	0.869364	0.846613	0.828269	0.465657
F1PWW0	Uncharacterized protein OS=Canis lupus familiaris GN=FLNA PE=4 SV=2 - [F1PWW0_CANLF]	2.57	4	5	5	16	2646	280.484	6.11279	1.11078	1.13005	1.12042	0.913905	0.942142	0.928024	0.828286	0.465699
J9NZT2	Uncharacterized protein OS=Canis lupus familiaris PE=4 SV=1 - [J9NZT2_CANLF]	52	1	4	5	98	125	13.4857	8.80713	1.05507	1.21169	1.13338	1.06253	0.819671	0.941103	0.830351	0.470942
E2RH23	Uncharacterized protein OS=Canis lupus familiaris GN=BRPF1 PE=4 SV=1 - [E2RH23_CANLF]	1.07	1	1	1	9	1220	138.089	7.73779	1.26757	1.32638	1.29697	1.08866	1.07129	1.07998	0.832689	0.476903
L7N0E8	Uncharacterized protein OS=Canis lupus familiaris PE=4 SV=1 - [L7N0E8_CANLF]	39.84	1	3	5	41	123	13.8135	4.93213	0.892921	0.896086	0.894503	1.07329	1.05469	1.06399	1.18947	0.477957
T2KEN6	Pentaxin OS=Canis lupus familiaris GN=CRP PE=2 SV=1 - [T2KEN6_CANLF]	43.95	2	7	7	50	223	25.3669	6.03662	0.785117	0.685792	0.735455	0.864695	0.884742	0.874719	1.18936	0.478245
F1PF02	Proteasome subunit beta type OS=Canis lupus familiaris GN=PSMB1 PE=3 SV=2 - [F1PF02_CANLF]	12.7	1	2	2	4	189	20.4531	7.88428	0.889774	0.948256	0.919015	1.00613	1.17351	1.08982	1.18586	0.486974
J9NRR0	Uncharacterized protein OS=Canis lupus familiaris GN=CREG1 PE=4 SV=1 - [J9NRR0_CANLF]	9.68	2	1	1	2	217	23.5734	7.54736	1.05807	0.964765	1.01142	1.41546	0.982395	1.19893	1.18539	0.488141
J9PAX5	Uncharacterized protein OS=Canis lupus familiaris PE=4 SV=1 - [J9PAX5_CANLF]	51.13	1	3	5	119	133	14.6742	7.76709	0.93416	0.929833	0.931997	1.13315	1.07509	1.10412	1.18468	0.489926
J9NUI6	Uncharacterized protein OS=Canis lupus familiaris GN=AMBP PE=4 SV=1 - [J9NUI6_CANLF]	41.55	2	11	11	71	349	38.8317	6.354	1.1838	1.17761	1.18071	1.01581	0.963719	0.989764	0.838282	0.491254
A0A077LQA5	Alpha-tubulin OS=Canis lupus familiaris GN=TUBA1A PE=2 SV=1 - [A0A077LQA5_CANLF]	8.2	9	3	3	5	451	50.1036	5.05908	1.24158	1.14399	1.19279	1.00206	0.999367	1.00071	0.838969	0.493028
F1PKN5	Uncharacterized protein OS=Canis lupus familiaris PE=4 SV=2 - [F1PKN5_CANLF]	10.96	1	1	1	22	146	15.8107	5.35107	0.923115	0.957885	0.9405	1.15717	1.068	1.11259	1.18297	0.494254
F1PCB5	Aminopeptidase N OS=Canis lupus familiaris GN=ANPEP PE=4 SV=2 - [F1PCB5_CANLF]	2.56	1	2	2	2	975	110.188	6.17627	0.830708	1.06133	0.946019	1.06241	1.17382	1.11812	1.18192	0.496935
F1PZR4	Hemopexin OS=Canis lupus familiaris GN=HPX PE=3 SV=2 - [F1PZR4_CANLF]	60.48	1	25	25	651	458	51.3053	7.31299	0.926723	0.930057	0.92839	1.12036	1.07136	1.09586	1.18038	0.500849
F1PAX2	Uncharacterized protein OS=Canis lupus familiaris GN=CP PE=3 SV=2 - [F1PAX2_CANLF]	38.59	2	38	38	497	1065	122.484	6.59521	0.927045	0.987947	0.957496	1.17251	1.08586	1.12918	1.17931	0.503607
H9GW55	Uncharacterized protein OS=Canis lupus familiaris GN=PGAM2 PE=3 SV=1 - [H9GW55_CANLF]	4.74	1	1	1	2	253	28.5917	8.73389	0.824117	0.716835	0.770476	0.622139	0.677077	0.649608	0.843125	0.50379
J9P182	Uncharacterized protein OS=Canis lupus familiaris PE=4 SV=1 - [J9P182_CANLF]	65.25	1	3	5	110	118	12.7604	7.97217	0.923435	0.983682	0.953558	1.15439	1.09276	1.12358	1.1783	0.506209
J9P430	Uncharacterized protein OS=Canis lupus familiaris GN=TF PE=3 SV=1 - [J9P430_CANLF]	81.08	3	66	69	3213	756	83.3232	7.88428	0.921861	0.941272	0.931567	1.1089	1.08322	1.09606	1.17658	0.510658
E2R489	Uncharacterized protein OS=Canis lupus familiaris GN=KRT84 PE=3 SV=1 - [E2R489_CANLF]	4.27	24	1	3	6	586	63.3318	8.00146	0.939762	0.912353	0.926057	1.07006	1.10827	1.08917	1.17613	0.511809
F1PQ85	Uncharacterized protein OS=Canis lupus familiaris GN=MASP1 PE=3 SV=2 - [F1PQ85_CANLF]	16.51	2	9	10	26	763	85.5982	4.93213	1.14342	1.0352	1.08931	0.890811	0.952971	0.921891	0.846306	0.512073
C0LQL0	Protein S100 OS=Canis lupus familiaris GN=S100A8 PE=2 SV=1 - [C0LQL0_CANLF]	20.22	2	2	2	3	89	10.3683	5.45264	0.746347	0.726703	0.736525	0.828066	0.902868	0.865467	1.17507	0.514584
F1PYF5	Matrix metalloproteinase-9 OS=Canis lupus familiaris GN=MMP9 PE=3 SV=2 - [F1PYF5_CANLF]	13.49	6	8	8	15	704	78.1621	5.63037	0.871104	0.804875	0.837989	0.989017	0.978615	0.983816	1.17402	0.517324
E2RFV9	Uncharacterized protein OS=Canis lupus familiaris GN=C9 PE=4 SV=2 - [E2RFV9_CANLF]	32.37	2	17	17	104	553	62.0976	5.35107	0.917774	0.916371	0.917072	1.08775	1.06547	1.07661	1.17396	0.517469
J9NX46	Uncharacterized protein OS=Canis lupus familiaris GN=GLIPR2 PE=3 SV=1 - [J9NX46_CANLF]	16.99	1	2	2	3	153	17.1396	9.51025	1.10619	1.15653	1.13136	0.909269	1.01448	0.961875	0.850195	0.522253
F1Q2N0	Uncharacterized protein OS=Canis lupus familiaris GN=PCLO PE=4 SV=2 - [F1Q2N0_CANLF]	0.18	1	1	1	6	4881	529.201	6.29053	1.1176	1.12066	1.11913	0.926079	0.978371	0.952225	0.850862	0.524006
J9PB14	Uncharacterized protein OS=Canis lupus familiaris GN=BTD PE=4 SV=1 - [J9PB14_CANLF]	28.76	2	14	14	66	532	59.4723	6.03662	1.07054	1.04474	1.05764	0.892371	0.909318	0.900844	0.851748	0.526336
J9P5F0	Uncharacterized protein OS=Canis lupus familiaris GN=CFD PE=3 SV=1 - [J9P5F0_CANLF]	41.38	1	9	9	35	261	27.9892	7.89893	1.09454	1.11765	1.10609	0.952147	0.932759	0.942453	0.852054	0.527142
J9NU05	Uncharacterized protein OS=Canis lupus familiaris GN=LDHB PE=3 SV=1 - [J9NU05_CANLF]	11.48	7	2	4	7	331	36.2048	6.17627	0.909527	0.681484	0.795505	0.709684	0.647894	0.678789	0.85328	0.53037
F1PLT8	Sulfhydryl oxidase OS=Canis lupus familiaris GN=QSOX1 PE=4 SV=2 - [F1PLT8_CANLF]	43.06	1	24	24	160	713	79.0925	8.77783	0.970061	0.983006	0.976533	1.16366	1.11795	1.14081	1.16822	0.532657
Q28278	Vitamin K-dependent protein C OS=Canis lupus familiaris GN=PROC PE=2 SV=2 - [PROC_CANLF]	12.28	2	5	5	16	456	50.7805	6.12549	1.1679	1.06964	1.11877	0.968015	0.943539	0.955777	0.854311	0.533089
F1PR54	Uncharacterized protein OS=Canis lupus familiaris GN=LTF PE=3 SV=1 - [F1PR54_CANLF]	38.84	4	23	25	177	708	77.2458	8.23584	0.850074	0.808269	0.829172	0.96044	0.97373	0.967085	1.16633	0.537731
F1Q041	Uncharacterized protein OS=Canis lupus familiaris GN=F13B PE=4 SV=2 - [F1Q041_CANLF]	28.04	1	17	17	76	649	74.2595	6.65381	0.967014	0.895545	0.93128	1.07144	1.09984	1.08564	1.16575	0.539286
E2R9D2	Uncharacterized protein OS=Canis lupus familiaris GN=F12 PE=3 SV=2 - [E2R9D2_CANLF]	21.8	1	7	7	18	399	43.1163	8.70459	0.968351	0.950324	0.959337	1.05187	1.18465	1.11826	1.16566	0.539521
F1Q184	Uncharacterized protein OS=Canis lupus familiaris PE=4 SV=2 - [F1Q184_CANLF]	24.26	1	5	5	101	202	21.6856	6.34131	0.932444	0.967711	0.950077	1.13821	1.07279	1.1055	1.16359	0.545121
E2QW61	Uncharacterized protein OS=Canis lupus familiaris GN=LBP PE=4 SV=2 - [E2QW61_CANLF]	14.98	1	5	5	18	247	27.1504	8.646	0.734685	0.726291	0.730488	0.811416	0.886635	0.849026	1.16227	0.548701
E2QX17	Proteasome subunit beta type OS=Canis lupus familiaris GN=PSMB3 PE=3 SV=1 - [E2QX17_CANLF]	20	2	3	3	6	205	22.9635	6.55127	0.951151	0.788128	0.869639	0.990774	1.0307	1.01074	1.16225	0.548762
F1PWR2	Uncharacterized protein OS=Canis lupus familiaris PE=4 SV=2 - [F1PWR2_CANLF]	56.42	3	78	78	1419	1753	192.771	6.88818	0.973614	0.972075	0.972845	1.1435	1.11704	1.13027	1.16182	0.549938
F1Q1K9	Uncharacterized protein OS=Canis lupus familiaris GN=HABP2 PE=3 SV=2 - [F1Q1K9_CANLF]	17.35	2	13	13	68	559	62.4718	6.97607	1.03028	0.93347	0.981877	1.09458	1.18691	1.14075	1.1618	0.549984
F1PCE2	Uncharacterized protein OS=Canis lupus familiaris GN=EXTL2 PE=4 SV=2 - [F1PCE2_CANLF]	8.23	2	2	2	4	316	35.9837	9.27588	0.990786	0.999973	0.995379	0.856834	0.856885	0.856859	0.860837	0.550392
E2R7Z9	Uncharacterized protein OS=Canis lupus familiaris GN=ACOT11 PE=4 SV=2 - [E2R7Z9_CANLF]	2.69	2	1	1	2	558	63.0097	7.75244	1.33473	0.729318	1.03203	1.11093	1.28641	1.19867	1.16148	0.55087
F1PY40	Uncharacterized protein OS=Canis lupus familiaris GN=CFI PE=4 SV=2 - [F1PY40_CANLF]	29.9	1	2	16	101	612	68.5111	7.72314	1.11644	1.18986	1.15315	1.11473	0.87749	0.99611	0.863817	0.558338
E2QWN7	Uncharacterized protein OS=Canis lupus familiaris GN=LCP1 PE=4 SV=1 - [E2QWN7_CANLF]	30.62	3	16	16	42	627	70.1848	5.32568	0.890296	0.940635	0.915465	1.07754	1.04282	1.06018	1.15808	0.5602
J9P669	Uncharacterized protein OS=Canis lupus familiaris GN=CDH5 PE=4 SV=1 - [J9P669_CANLF]	8.29	2	5	5	8	772	86.2344	5.2876	1.10053	1.16737	1.13395	0.985791	0.975969	0.98088	0.865012	0.561532
F1PIC7	Uncharacterized protein OS=Canis lupus familiaris GN=HSPA5 PE=3 SV=2 - [F1PIC7_CANLF]	10.4	5	4	6	7	654	72.2385	5.16064	1.04017	1.0721	1.05613	0.869563	0.961088	0.915326	0.866676	0.565989
F1PDJ7	Uncharacterized protein OS=Canis lupus familiaris GN=AZGP1 PE=3 SV=2 - [F1PDJ7_CANLF]	55.24	2	17	17	156	315	35.8324	4.91943	0.961356	0.961489	0.961422	1.11656	1.10467	1.11062	1.15518	0.568243
J9P6Z9	Uncharacterized protein OS=Canis lupus familiaris PE=4 SV=1 - [J9P6Z9_CANLF]	64.66	1	2	4	95	116	12.5182	6.59521	0.971882	0.980555	0.976219	1.078	1.17666	1.12733	1.15479	0.569322
F1PP21	Uncharacterized protein OS=Canis lupus familiaris GN=ISL1 PE=4 SV=2 - [F1PP21_CANLF]	2.78	1	1	1	2	360	40.26	8.36768	1.20657	1.14051	1.17354	0.942094	1.09505	1.01857	0.867946	0.569397
J9NVT1	Uncharacterized protein OS=Canis lupus familiaris GN=UBC PE=4 SV=1 - [J9NVT1_CANLF]	23.62	5	2	2	4	381	42.8251	7.57666	1.15655	1.13785	1.1472	1.01699	0.979434	0.998213	0.870129	0.575263
F1PLV6	Fibulin-1 OS=Canis lupus familiaris GN=FBLN1 PE=3 SV=2 - [F1PLV6_CANLF]	10.17	1	5	5	31	708	77.8814	5.2876	1.18304	1.1325	1.15777	0.997982	1.01901	1.0085	0.871068	0.57779
F1PKB2	Alpha-mannosidase OS=Canis lupus familiaris GN=MAN2B1 PE=3 SV=2 - [F1PKB2_CANLF]	8.54	1	7	7	17	1007	113.05	7.66455	0.980787	1.10179	1.04129	0.85947	0.954933	0.907201	0.871228	0.578221
F1PV45	Uncharacterized protein OS=Canis lupus familiaris GN=TTN PE=4 SV=2 - [F1PV45_CANLF]	0.03	1	1	1	2	35180	3904.61	6.354	1.09401	0.80772	0.950865	1.0244	1.16552	1.09496	1.15154	0.578452
F1PIG0	Uncharacterized protein OS=Canis lupus familiaris GN=TGFBR3 PE=4 SV=2 - [F1PIG0_CANLF]	2.57	1	2	2	4	857	94.1563	5.79541	0.911584	0.917654	0.914619	1.06245	1.04239	1.05242	1.15066	0.580927
F6XKC0	Uncharacterized protein OS=Canis lupus familiaris GN=C8G PE=3 SV=1 - [F6XKC0_CANLF]	34.65	2	5	5	24	202	22.5297	8.67529	1.13389	1.10777	1.12083	1.00621	0.949113	0.977663	0.872269	0.581026
F1PHS2	Uncharacterized protein OS=Canis lupus familiaris GN=SERPINA6 PE=3 SV=2 - [F1PHS2_CANLF]	32.67	7	13	13	51	404	45.447	6.02393	1.02866	0.994511	1.01158	0.852509	0.912845	0.882677	0.872568	0.581833
F2Z4Q6	Serum albumin OS=Canis lupus familiaris GN=ALB PE=4 SV=1 - [F2Z4Q6_CANLF]	90.63	4	5	80	12948	608	68.5619	5.69385	0.96721	0.981246	0.974228	1.13434	1.10647	1.12041	1.15005	0.58267
F1PBK6	Uncharacterized protein OS=Canis lupus familiaris GN=CA1 PE=4 SV=2 - [F1PBK6_CANLF]	18.39	1	3	3	15	261	28.9765	7.12256	0.669214	0.79843	0.733822	0.873368	0.814069	0.843719	1.14976	0.58349
E2QXJ3	Uncharacterized protein OS=Canis lupus familiaris PE=4 SV=1 - [E2QXJ3_CANLF]	25.86	1	2	2	5	116	12.6472	4.95752	0.983463	1.11264	1.04805	1.34706	1.06239	1.20472	1.14949	0.584251
F1Q4A3	Uncharacterized protein OS=Canis lupus familiaris GN=F10 PE=3 SV=2 - [F1Q4A3_CANLF]	17.71	2	8	8	46	497	54.628	5.17334	0.959784	0.929656	0.94472	1.12439	1.04613	1.08526	1.14876	0.586329
F5XVB0	von Willebrand factor OS=Canis lupus familiaris GN=VWF PE=2 SV=1 - [F5XVB0_CANLF]	2.67	3	5	5	15	2813	309.482	5.5415	0.702006	0.88269	0.792348	0.959404	0.859242	0.909323	1.14763	0.589544
F1P832	Alpha-1,4 glucan phosphorylase OS=Canis lupus familiaris GN=PYGM PE=3 SV=2 - [F1P832_CANLF]	2.14	1	1	1	2	842	97.1468	7.10791	0.891853	0.914712	0.903282	0.725406	0.856335	0.790871	0.875552	0.589893
E2RT38	Uncharacterized protein OS=Canis lupus familiaris GN=MGAM PE=3 SV=2 - [E2RT38_CANLF]	36.33	4	58	58	365	1833	207.228	5.90967	1.03395	1.03725	1.0356	0.929224	0.885047	0.907135	0.875955	0.590983
E2R7G9	Uncharacterized protein OS=Canis lupus familiaris PE=4 SV=2 - [E2R7G9_CANLF]	58.09	1	5	5	80	136	14.63	5.38916	0.964052	0.962039	0.963045	1.138	1.0694	1.1037	1.14605	0.594072
F1PQ91	Uncharacterized protein OS=Canis lupus familiaris GN=IGFBP3 PE=4 SV=2 - [F1PQ91_CANLF]	15.46	1	5	5	13	291	31.0982	8.54346	1.12371	1.06721	1.09546	0.87643	1.04622	0.961323	0.877554	0.595315
L7N0J8	Uncharacterized protein OS=Canis lupus familiaris PE=4 SV=1 - [L7N0J8_CANLF]	1.62	1	1	1	4	678	76.0069	9.61279	1.11644	0.679166	0.897806	0.888329	1.16758	1.02796	1.14496	0.59719
J9NYC5	Uncharacterized protein OS=Canis lupus familiaris GN=CAECAM1 PE=4 SV=1 - [J9NYC5_CANLF]	10.49	16	4	4	14	429	46.8312	6.78564	0.884401	0.873385	0.878893	0.980262	1.03173	1.00599	1.14461	0.598196
J9P9X0	Uncharacterized protein OS=Canis lupus familiaris GN=IL1RAP PE=4 SV=1 - [J9P9X0_CANLF]	15.3	3	8	8	23	523	60.0296	5.98584	0.915588	0.956042	0.935815	1.06353	1.07736	1.07044	1.14386	0.600374
Q28260	Vascular cell adhesion protein 1 OS=Canis lupus familiaris GN=VCAM1 PE=2 SV=1 - [VCAM1_CANLF]	15.83	2	10	10	19	739	81.3602	5.0083	1.0429	1.06111	1.05201	0.895441	0.958107	0.926774	0.880957	0.604551
Q28284	CD44 antigen (Fragment) OS=Canis lupus familiaris GN=CD44 PE=2 SV=1 - [CD44_CANLF]	8.83	3	3	3	19	351	38.0426	6.34131	0.932017	0.984624	0.95832	1.11895	1.06757	1.09326	1.14081	0.609231
E2RKQ6	Uncharacterized protein OS=Canis lupus familiaris GN=LGALS3BP PE=4 SV=1 - [E2RKQ6_CANLF]	15.21	1	6	6	15	559	62.1708	5.31299	0.869251	0.921617	0.895434	1.10673	0.935727	1.02123	1.14049	0.610166
E2R0J4	Uncharacterized protein OS=Canis lupus familiaris GN=ANTXR2 PE=4 SV=2 - [E2R0J4_CANLF]	4.64	1	2	2	3	496	54.1785	8.60205	0.903753	0.987065	0.945409	1.04752	1.10872	1.07812	1.14037	0.610507
F1PKL6	Uncharacterized protein OS=Canis lupus familiaris PE=4 SV=2 - [F1PKL6_CANLF]	31.51	1	3	3	22	146	15.6575	5.10986	0.968427	1.11154	1.03998	1.17657	1.1934	1.18498	1.13942	0.61327
J9P319	Uncharacterized protein OS=Canis lupus familiaris GN=OMD PE=4 SV=1 - [J9P319_CANLF]	13.53	2	5	5	12	414	48.4607	5.35107	1.15651	0.954867	1.05569	0.942555	0.925939	0.934247	0.884965	0.615468
F1PBI6	Uncharacterized protein OS=Canis lupus familiaris GN=THBS1 PE=4 SV=2 - [F1PBI6_CANLF]	17.18	6	18	18	55	1170	129.53	4.98291	1.186	1.20715	1.19658	1.09328	1.0265	1.05989	0.885771	0.617668
E2RJC2	Uncharacterized protein OS=Canis lupus familiaris GN=C1QC PE=4 SV=1 - [E2RJC2_CANLF]	25.31	1	5	5	24	245	25.6227	7.84033	0.906336	0.941672	0.924004	1.0075	1.09404	1.05077	1.13719	0.619833
J9P849	Proteasome subunit alpha type OS=Canis lupus familiaris GN=PSMA3 PE=3 SV=1 - [J9P849_CANLF]	21.14	2	5	5	12	246	27.3688	7.37158	0.965814	0.894427	0.93012	0.848871	0.805504	0.827188	0.889334	0.627408
F1PN98	Uncharacterized protein OS=Canis lupus familiaris GN=F5 PE=3 SV=2 - [F1PN98_CANLF]	16.38	2	31	31	99	2222	251.715	5.77002	1.13684	1.12273	1.12979	1.01182	0.999288	1.00555	0.890039	0.629339
J9NYG8	Uncharacterized protein OS=Canis lupus familiaris GN=C4BPB PE=4 SV=1 - [J9NYG8_CANLF]	27.06	2	9	9	58	255	28.5237	5.18604	0.999978	1.01387	1.00692	1.12445	1.15882	1.14164	1.13379	0.629903
F1PA63	Uncharacterized protein OS=Canis lupus familiaris GN=LCAT PE=4 SV=1 - [F1PA63_CANLF]	11.42	1	3	3	9	438	49.704	6.16357	0.932314	1.15979	1.04605	0.895623	0.967724	0.931673	0.890658	0.631034
F1P707	Uncharacterized protein OS=Canis lupus familiaris PE=4 SV=2 - [F1P707_CANLF]	36.91	2	52	52	341	1661	186.676	7.29834	0.964521	0.967569	0.966045	1.10883	1.07815	1.09349	1.13192	0.635469
J9NWJ5	Thioredoxin OS=Canis lupus familiaris GN=TXN PE=3 SV=1 - [J9NWJ5_CANLF]	23.76	2	2	2	3	101	11.3796	5.21143	1.26668	0.936147	1.10141	0.899886	1.06652	0.983205	0.892677	0.636571
L7N0P9	Uncharacterized protein OS=Canis lupus familiaris PE=4 SV=1 - [L7N0P9_CANLF]	43.65	4	2	5	98	126	13.5887	7.98682	0.978597	1.02834	1.00347	1.19256	1.07463	1.13359	1.12968	0.64221
J9P3L5	Uncharacterized protein OS=Canis lupus familiaris PE=4 SV=1 - [J9P3L5_CANLF]	30.61	1	1	3	73	147	15.5746	4.83057	1.05455	1.15127	1.10291	1.00089	0.973122	0.987005	0.894909	0.6427
J9NYC0	Uncharacterized protein OS=Canis lupus familiaris GN=MFAP4 PE=4 SV=1 - [J9NYC0_CANLF]	9.84	1	2	2	11	254	28.3758	5.89697	1.07398	0.954842	1.01441	0.783719	1.0319	0.907811	0.894914	0.642714
P01784	Ig heavy chain V region GOM OS=Canis lupus familiaris PE=1 SV=1 - [HV01_CANLF]	42.98	1	2	3	206	114	12.4221	5.40186	1.04557	0.989796	1.01768	1.14866	1.149	1.14883	1.12887	0.644658
J9P6T6	Uncharacterized protein OS=Canis lupus familiaris GN=MEIG1 PE=4 SV=1 - [J9P6T6_CANLF]	11.36	1	1	1	3	88	10.8054	9.24658	1.15175	1.17776	1.16476	1.03758	1.05097	1.04428	0.896563	0.64725
J9NUF2	Uncharacterized protein OS=Canis lupus familiaris GN=FLT4 PE=3 SV=1 - [J9NUF2_CANLF]	5.16	2	5	5	11	1336	149.641	6.37939	1.22266	1.05215	1.1374	0.944466	1.09604	1.02025	0.897002	0.648458
E2R4V3	Uncharacterized protein OS=Canis lupus familiaris GN=SERPINF2 PE=3 SV=1 - [E2R4V3_CANLF]	52.34	1	22	22	224	491	54.9185	7.18115	0.920403	0.998139	0.959271	1.13123	1.03049	1.08086	1.12675	0.651061
F1PIX8	Uncharacterized protein OS=Canis lupus familiaris GN=C3 PE=4 SV=2 - [F1PIX8_CANLF]	72.2	2	122	122	4504	1662	186.787	6.87354	0.967343	0.970157	0.96875	1.10129	1.08012	1.0907	1.12589	0.653691
J9PAQ5	Protein S100 OS=Canis lupus familiaris GN=S100A12 PE=3 SV=1 - [J9PAQ5_CANLF]	27.17	2	2	2	4	92	10.4984	6.06201	0.720614	0.57727	0.648942	0.795236	0.664686	0.729961	1.12485	0.656858
A1ILJ0	Alpha 1 antitrypsin OS=Canis lupus familiaris PE=2 SV=1 - [A1ILJ0_CANLF]	40	3	1	17	776	415	46.2767	5.89697	0.926171	0.98379	0.954981	1.07423	1.07224	1.07323	1.12383	0.659981
E2QX19	Uncharacterized protein OS=Canis lupus familiaris GN=MST1 PE=3 SV=2 - [E2QX19_CANLF]	6.47	2	4	4	7	711	80.1645	7.47412	1.08302	0.913106	0.99806	1.05737	1.18539	1.12138	1.12356	0.660806
E2QZ98	Uncharacterized protein OS=Canis lupus familiaris GN=ANGPTL3 PE=4 SV=1 - [E2QZ98_CANLF]	8.06	2	4	4	6	459	53.7903	6.99072	1.0867	1.21965	1.15318	1.05332	1.02611	1.03971	0.901608	0.661149
F1P8Z5	Uncharacterized protein OS=Canis lupus familiaris GN=APOB PE=4 SV=1 - [F1P8Z5_CANLF]	48.86	5	186	186	1133	4425	501.222	6.88818	1.02191	1.02956	1.02573	1.17103	1.13337	1.1522	1.12329	0.661626
F6Y290	Leukotriene A(4) hydrolase OS=Canis lupus familiaris GN=LTA4H PE=3 SV=1 - [F6Y290_CANLF]	8.13	1	5	5	7	701	78.662	7.03467	1.0788	1.10484	1.09182	1.00294	0.966854	0.984896	0.902068	0.662421
F1PEN8	Carboxylic ester hydrolase OS=Canis lupus familiaris GN=BCHE PE=3 SV=1 - [F1PEN8_CANLF]	9.14	1	4	4	7	602	68.4747	7.63525	1.24117	0.875724	1.05845	0.987797	0.922112	0.954954	0.902224	0.662849
E2RA67	C-C motif chemokine OS=Canis lupus familiaris GN=CCL14 PE=3 SV=1 - [E2RA67_CANLF]	21.88	1	2	2	21	96	11.0075	8.104	1.03408	1.05396	1.04402	1.19751	1.14654	1.17202	1.12261	0.663718
F1PKR3	Uncharacterized protein OS=Canis lupus familiaris GN=VCL PE=4 SV=2 - [F1PKR3_CANLF]	16.29	3	15	15	28	1062	115.46	6.02393	1.11552	1.04376	1.07964	0.973949	0.975514	0.974731	0.902829	0.664522
J9P9G4	Proteasome subunit alpha type OS=Canis lupus familiaris PE=3 SV=1 - [J9P9G4_CANLF]	23.57	6	6	6	15	263	29.3158	6.60986	1.08922	0.980151	1.03469	0.983184	0.895949	0.939567	0.908069	0.679011
E2QUV3	Uncharacterized protein OS=Canis lupus familiaris GN=AHSG PE=4 SV=2 - [E2QUV3_CANLF]	44.38	1	14	14	636	365	39.2228	5.31299	1.08416	1.08867	1.08641	0.98403	0.989996	0.987013	0.908505	0.680217
F1PPB6	Uncharacterized protein OS=Canis lupus familiaris GN=DERA PE=4 SV=2 - [F1PPB6_CANLF]	4.4	1	1	1	2	318	35.2327	8.95361	0.858713	0.965281	0.911997	0.902187	0.759002	0.830595	0.910743	0.686417
P18649	Apolipoprotein E OS=Canis lupus familiaris GN=APOE PE=1 SV=2 - [APOE_CANLF]	65.25	1	2	23	255	305	35.3321	5.23682	0.977291	0.782716	0.880004	0.886789	1.07542	0.981104	1.11489	0.687682
J9P2L7	Uncharacterized protein OS=Canis lupus familiaris PE=4 SV=1 - [J9P2L7_CANLF]	7.86	1	1	1	3	140	14.8362	7.07861	0.807902	1.26082	1.03436	1.29269	1.01206	1.15238	1.11409	0.69017
J9NT12	Uncharacterized protein OS=Canis lupus familiaris GN=FGL1 PE=4 SV=1 - [J9NT12_CANLF]	10.03	1	3	3	3	309	35.9454	5.97314	0.787744	0.843017	0.815381	0.857957	0.958698	0.908328	1.11399	0.690489
E2RFB7	Amine oxidase OS=Canis lupus familiaris GN=AOC3 PE=3 SV=2 - [E2RFB7_CANLF]	8.78	4	7	7	30	763	84.1922	6.3667	1.16966	1.10502	1.13734	1.05128	1.0307	1.04099	0.91528	0.699007
E2RRU2	Uncharacterized protein OS=Canis lupus familiaris GN=SMPDL3A PE=4 SV=2 - [E2RRU2_CANLF]	18.91	2	5	5	14	349	40.2722	6.65381	1.02362	1.05638	1.04	0.938157	0.967856	0.953007	0.916349	0.701976
F1PPZ2	Ribonuclease A B1 OS=Canis lupus familiaris GN=RNASE4 PE=3 SV=2 - [F1PPZ2_CANLF]	8.97	1	1	1	6	145	16.5272	9.0415	0.98439	1.00067	0.992533	1.18711	1.01667	1.10189	1.11018	0.702516
F1PP29	Uncharacterized protein OS=Canis lupus familiaris GN=IGHE PE=4 SV=1 - [F1PP29_CANLF]	17.05	1	6	6	14	440	48.6272	7.43018	1.11534	1.06649	1.09092	0.940049	1.06475	1.0024	0.918857	0.708945
E2R416	Uncharacterized protein OS=Canis lupus familiaris GN=LUM PE=4 SV=1 - [E2R416_CANLF]	38.76	1	11	11	59	338	38.3228	6.68311	1.03557	1.03623	1.0359	0.98075	0.923007	0.951879	0.918889	0.709033
J9NST4	Uncharacterized protein OS=Canis lupus familiaris GN=SEPP1 PE=4 SV=1 - [J9NST4_CANLF]	9.2	1	3	3	18	163	19.0712	6.69775	0.998808	0.944655	0.971732	1.18973	0.963819	1.07677	1.1081	0.709155
P25473	Clusterin OS=Canis lupus familiaris GN=CLU PE=2 SV=1 - [CLUS_CANLF]	33.93	2	19	19	350	445	51.7566	5.90967	0.953118	0.961669	0.957394	1.08094	1.03978	1.06036	1.10755	0.710906
E2RN10	Beta-2-microglobulin OS=Canis lupus familiaris GN=B2M PE=2 SV=2 - [E2RN10_CANLF]	16.8	1	2	2	17	125	14.2543	6.3667	1.01663	0.87544	0.946035	0.976034	1.11903	1.04753	1.10729	0.711745
F6Y6T8	Uncharacterized protein OS=Canis lupus familiaris GN=PIGR PE=4 SV=1 - [F6Y6T8_CANLF]	29.13	4	15	15	54	762	83.142	5.51611	1.14279	1.09924	1.12101	0.983423	1.08114	1.03228	0.920845	0.714473
P33703	Beta-2-glycoprotein 1 OS=Canis lupus familiaris GN=APOH PE=2 SV=1 - [APOH_CANLF]	56.23	1	19	19	242	345	38.3777	8.1333	0.980206	0.966998	0.973602	1.03542	1.11556	1.07549	1.10465	0.72021
J9P227	Uncharacterized protein OS=Canis lupus familiaris GN=KIAA1033 PE=4 SV=1 - [J9P227_CANLF]	0.85	5	2	2	12	1172	136.17	7.43018	1.03605	1.23718	1.13661	1.11568	0.985133	1.0504	0.924153	0.72368
F1PEN6	Transferrin receptor protein 1 OS=Canis lupus familiaris GN=TFRC PE=2 SV=1 - [F1PEN6_CANLF]	29.35	3	22	22	142	770	86.5324	6.30322	0.898209	0.90078	0.899494	1.01306	0.971536	0.992296	1.10317	0.724967
E2RCC8	Uncharacterized protein OS=Canis lupus familiaris PE=4 SV=2 - [E2RCC8_CANLF]	52.22	2	19	22	1834	473	51.9588	7.34229	0.979249	1.00521	0.99223	1.11062	1.07519	1.0929	1.10146	0.730491
J9NSF9	Prothrombin OS=Canis lupus familiaris GN=F2 PE=3 SV=1 - [J9NSF9_CANLF]	52.33	4	30	30	343	621	70.2585	5.99854	0.971063	0.978688	0.974876	1.08611	1.06118	1.07365	1.10132	0.730972
E2RGT6	Uncharacterized protein OS=Canis lupus familiaris GN=C6 PE=4 SV=2 - [E2RGT6_CANLF]	39.74	1	34	34	181	936	105.466	6.43018	0.986447	0.956412	0.97143	1.07457	1.06394	1.06926	1.1007	0.732961
E2RNW1	Uncharacterized protein OS=Canis lupus familiaris GN=PIBF1 PE=4 SV=1 - [E2RNW1_CANLF]	0.92	1	1	1	5	757	90.1146	6.04932	0.970738	1.05705	1.01389	0.947561	0.933364	0.940463	0.927575	0.733211
F1PAL5	Uncharacterized protein OS=Canis lupus familiaris GN=AGT PE=3 SV=2 - [F1PAL5_CANLF]	40.88	4	20	20	208	477	51.7168	5.98584	0.927366	0.933317	0.930341	1.06603	0.980168	1.0231	1.0997	0.736216
F6V9A6	Uncharacterized protein OS=Canis lupus familiaris GN=COL6A3 PE=4 SV=1 - [F6V9A6_CANLF]	2.25	4	5	5	8	2671	288.972	8.55811	1.09489	1.11191	1.1034	1.00911	1.0432	1.02616	0.929996	0.739957
Q28256	Platelet glycoprotein Ib alpha chain OS=Canis lupus familiaris GN=GP1BA PE=2 SV=2 - [GP1BA_CANLF]	7.24	1	5	5	18	677	74.0861	5.90967	0.989213	1.04397	1.01659	1.00108	0.894097	0.947591	0.932123	0.745887
J9P0D4	Uncharacterized protein OS=Canis lupus familiaris GN=IGKV2D-26 PE=4 SV=1 - [J9P0D4_CANLF]	14.89	1	2	3	38	141	15.5068	8.30908	0.811025	0.748331	0.779678	0.46053	0.997162	0.728846	0.934804	0.753361
F1PEH9	Uncharacterized protein OS=Canis lupus familiaris GN=ACSL4 PE=4 SV=2 - [F1PEH9_CANLF]	1.04	1	1	1	2	670	74.3769	8.01611	1.05872	0.989984	1.02435	0.912272	1.00493	0.958603	0.935815	0.756182
E2R109	Uncharacterized protein OS=Canis lupus familiaris GN=C8A PE=4 SV=1 - [E2R109_CANLF]	25.3	1	13	13	60	589	66.1596	6.93213	0.988273	0.955134	0.971703	1.05761	1.06523	1.06142	1.09233	0.760428
F1PGD4	Uncharacterized protein OS=Canis lupus familiaris GN=NELL2 PE=4 SV=2 - [F1PGD4_CANLF]	4.78	1	3	3	8	816	91.1594	5.77002	1.14266	1.02221	1.08243	0.977206	1.05389	1.01555	0.938208	0.762856
L7N0K1	Uncharacterized protein OS=Canis lupus familiaris PE=4 SV=1 - [L7N0K1_CANLF]	9.2	1	1	1	9	174	18.1347	8.06006	1.09165	1.07096	1.0813	0.975484	1.05424	1.01486	0.938552	0.763815
F1PDJ5	Apolipoprotein A-I OS=Canis lupus familiaris GN=APOA1 PE=3 SV=1 - [F1PDJ5_CANLF]	85.71	14	41	41	5742	266	30.1628	5.38916	1.06039	1.06416	1.06227	1.01679	0.982939	0.999863	0.941247	0.771334
E2R2J3	Uncharacterized protein OS=Canis lupus familiaris GN=WDR54 PE=4 SV=1 - [E2R2J3_CANLF]	2.69	1	1	1	3	334	35.6088	6.31592	0.861164	0.934291	0.897728	1.23083	0.724302	0.977565	1.08893	0.771721
F1PE28	Uncharacterized protein OS=Canis lupus familiaris GN=TKT PE=4 SV=2 - [F1PE28_CANLF]	18.58	1	9	9	23	576	63.1143	7.15186	1.01282	1.01044	1.01163	0.953672	0.957197	0.955434	0.944449	0.780266
J9P7F7	Uncharacterized protein OS=Canis lupus familiaris GN=LOC608247 PE=4 SV=1 - [J9P7F7_CANLF]	42.86	1	12	12	72	322	34.5098	7.03467	1.00003	1.00451	1.00227	1.11826	1.05718	1.08772	1.08526	0.784033
B5LX43	Factor XI OS=Canis lupus familiaris PE=2 SV=1 - [B5LX43_CANLF]	12.18	2	6	7	15	624	69.7483	8.14795	1.01415	0.957251	0.985699	0.85655	1.0083	0.932426	0.945954	0.784463
P54714	Triosephosphate isomerase OS=Canis lupus familiaris GN=TPI1 PE=1 SV=3 - [TPIS_CANLF]	32.93	2	6	6	14	249	26.6978	7.32764	0.899194	1.0207	0.959947	0.864361	0.952741	0.908551	0.946459	0.785872
F1PUM6	Uncharacterized protein OS=Canis lupus familiaris GN=VTN PE=4 SV=1 - [F1PUM6_CANLF]	23.4	2	10	10	90	470	53.672	5.14795	1.0762	1.04965	1.06293	1.02589	0.990219	1.00805	0.948375	0.791215
F1PSS8	Uncharacterized protein OS=Canis lupus familiaris GN=PROS1 PE=4 SV=2 - [F1PSS8_CANLF]	28.87	1	21	21	157	679	75.9506	5.59229	1.0213	1.01067	1.01598	1.10868	1.0922	1.10044	1.08312	0.79122
E2RNG3	Uncharacterized protein OS=Canis lupus familiaris GN=CPN1 PE=4 SV=1 - [E2RNG3_CANLF]	31.73	2	10	10	86	457	51.9062	7.13721	1.06449	1.05789	1.06119	0.996748	1.02023	1.00849	0.950337	0.796686
F1Q462	Superoxide dismutase [Cu-Zn] OS=Canis lupus familiaris GN=SOD1 PE=3 SV=2 - [F1Q462_CANLF]	14.67	2	2	2	3	150	15.5527	6.52197	0.971118	0.919142	0.94513	0.979476	1.06363	1.02155	1.08086	0.798893
E2RA70	C-C motif chemokine OS=Canis lupus familiaris GN=CCL16 PE=3 SV=2 - [E2RA70_CANLF]	23.14	2	2	2	2	121	13.9026	10.0962	1.38701	1.1217	1.25436	0.991552	1.39562	1.19358	0.951552	0.800072
E2RH18	Uncharacterized protein OS=Canis lupus familiaris GN=CFP PE=4 SV=1 - [E2RH18_CANLF]	9.05	1	3	3	13	464	50.5038	8.08936	1.04277	1.00003	1.0214	0.959819	0.987274	0.973546	0.953149	0.804525
E2R1N7	Uncharacterized protein OS=Canis lupus familiaris GN=PCYOX1 PE=4 SV=1 - [E2R1N7_CANLF]	16.24	1	6	6	11	505	56.6687	6.53662	1.09788	1.12521	1.11154	1.07209	1.04745	1.05977	0.953419	0.805276
J9P1G2	Uncharacterized protein OS=Canis lupus familiaris GN=C1QB PE=4 SV=1 - [J9P1G2_CANLF]	15.2	1	4	4	28	250	26.2794	9.02686	0.95574	1.06542	1.01058	0.975312	0.954228	0.96477	0.954668	0.808756
F6USM4	Uncharacterized protein OS=Canis lupus familiaris GN=MASP2 PE=3 SV=1 - [F6USM4_CANLF]	7	1	3	3	6	686	74.8844	5.8335	0.954011	1.06615	1.01008	1.0555	1.12079	1.08815	1.07729	0.811055
F1PTY1	Keratin, type II cytoskeletal 1 OS=Canis lupus familiaris GN=KRT1 PE=3 SV=1 - [F1PTY1_CANLF]	13.73	2	7	9	34	619	63.675	7.84033	0.922809	0.923421	0.923115	0.972892	1.01513	0.994012	1.0768	0.812718
E2RS79	Uncharacterized protein OS=Canis lupus familiaris GN=C2 PE=3 SV=2 - [E2RS79_CANLF]	43.46	1	7	31	165	780	86.2334	7.97217	0.98529	1.02676	1.00603	1.07538	1.0903	1.08284	1.07635	0.81426
F1PSJ5	Uncharacterized protein OS=Canis lupus familiaris PE=4 SV=2 - [F1PSJ5_CANLF]	73.96	1	2	4	292	96	10.4701	8.47021	1.08543	1.20663	1.14603	1.12152	1.07504	1.09828	0.958334	0.818966
F1P6E1	Uncharacterized protein OS=Canis lupus familiaris GN=C1S PE=3 SV=2 - [F1P6E1_CANLF]	35.68	1	22	23	206	695	77.4802	4.93213	1.02287	0.991458	1.00716	0.95585	0.974842	0.965346	0.958478	0.819369
F1PAF3	Hepatocyte growth factor activator OS=Canis lupus familiaris GN=HGFAC PE=3 SV=1 - [F1PAF3_CANLF]	20.95	2	10	10	52	654	70.256	7.6499	1.08011	0.999729	1.03992	0.95888	1.03703	0.997952	0.959643	0.822611
E2RLA5	Uncharacterized protein OS=Canis lupus familiaris GN=GOLM1 PE=4 SV=2 - [E2RLA5_CANLF]	19.46	1	7	7	16	406	45.5549	4.79248	1.00527	1.00306	1.00417	0.97801	0.949406	0.963708	0.959708	0.822792
F1PHN8	Uncharacterized protein OS=Canis lupus familiaris GN=SERPINA4 PE=3 SV=2 - [F1PHN8_CANLF]	30.35	1	12	12	65	425	48.451	7.40088	0.929564	0.972358	0.950961	1.00899	1.03184	1.02042	1.07304	0.825657
E2RN74	Uncharacterized protein OS=Canis lupus familiaris GN=CPB2 PE=4 SV=1 - [E2RN74_CANLF]	14.66	1	6	6	19	423	49.0527	7.78174	0.915786	1.15654	1.03616	1.05416	0.937811	0.995987	0.961228	0.827022
J9P0V6	Uncharacterized protein OS=Canis lupus familiaris PE=4 SV=1 - [J9P0V6_CANLF]	31.91	1	2	3	43	141	14.8793	8.08936	1.06802	1.09435	1.08119	1.18338	1.13591	1.15964	1.07257	0.82727
E2RKI1	Uncharacterized protein OS=Canis lupus familiaris GN=DMKN PE=4 SV=2 - [E2RKI1_CANLF]	7.71	4	2	2	4	454	43.3521	6.94678	0.936771	1.14903	1.0429	1.06566	0.942335	1.004	0.962698	0.831112
F1PYR5	Uncharacterized protein OS=Canis lupus familiaris PE=4 SV=2 - [F1PYR5_CANLF]	39.22	1	5	6	126	232	24.9363	6.87354	1.05165	1.08627	1.06896	1.09524	0.963039	1.02914	0.962749	0.831254
L7N0N6	Alpha-amylase OS=Canis lupus familiaris GN=AMY2B PE=3 SV=1 - [L7N0N6_CANLF]	37.42	4	11	11	47	449	51.3139	7.62061	0.97462	0.965958	0.970289	1.04797	1.03049	1.03923	1.07105	0.8325
E2RAK7	Apolipoprotein A-II OS=Canis lupus familiaris GN=APOA2 PE=1 SV=2 - [APOA2_CANLF]	61	1	6	6	256	100	11.2179	6.65381	0.977529	0.988433	0.982981	1.0777	1.02612	1.05191	1.07012	0.835721
F1Q4D9	Uncharacterized protein OS=Canis lupus familiaris GN=RBP4 PE=3 SV=1 - [F1Q4D9_CANLF]	72.51	3	13	13	122	211	23.8176	5.71924	0.948622	0.949899	0.94926	1.00553	1.02233	1.01393	1.06813	0.842644
E2RGB0	Uncharacterized protein OS=Canis lupus familiaris GN=APOC4 PE=4 SV=2 - [E2RGB0_CANLF]	20.66	1	2	2	12	121	13.728	8.646	0.961533	0.896062	0.928797	0.904364	0.894147	0.899255	0.968193	0.846381
E2RPW3	Uncharacterized protein OS=Canis lupus familiaris GN=PON1 PE=4 SV=2 - [E2RPW3_CANLF]	40.17	1	12	12	226	356	40.1427	5.42725	1.00718	1.08922	1.0482	1.03734	0.992872	1.0151	0.968429	0.847036
E2QVU9	Uncharacterized protein OS=Canis lupus familiaris GN=BLVRB PE=4 SV=1 - [E2QVU9_CANLF]	26.7	1	3	3	4	206	22.0653	7.59131	0.997431	0.970925	0.984178	1.07819	0.829202	0.953696	0.969028	0.848698
F1PUB5	Uncharacterized protein OS=Canis lupus familiaris GN=PSMA7 PE=4 SV=2 - [F1PUB5_CANLF]	27.4	3	3	5	6	219	24.5661	8.70459	1.04832	1.07865	1.06349	1.1885	1.07823	1.13336	1.06571	0.851093
Q95J95	Adiponectin (Fragment) OS=Canis lupus familiaris GN=APM1 PE=2 SV=1 - [Q95J95_CANLF]	31.44	3	5	5	101	194	20.8765	8.00146	0.989125	0.983233	0.986179	1.06863	1.0312	1.04992	1.06463	0.854856
F1PAB0	Uncharacterized protein OS=Canis lupus familiaris PE=4 SV=2 - [F1PAB0_CANLF]	18.1	1	7	7	19	569	62.1199	5.26221	0.99713	0.970872	0.984001	0.933648	0.979438	0.956543	0.972096	0.857207
F1PC59	Uncharacterized protein OS=Canis lupus familiaris GN=PRDX6 PE=4 SV=1 - [F1PC59_CANLF]	10.86	1	2	2	3	221	24.6559	6.01123	0.661688	1.13484	0.898265	1.23171	0.679467	0.955588	1.06382	0.857713
E2R5E9	Uncharacterized protein OS=Canis lupus familiaris PE=4 SV=2 - [E2R5E9_CANLF]	21.28	1	1	1	8	47	5.56684	8.48486	0.925211	0.991633	0.958422	1.0677	0.970788	1.01924	1.06346	0.858963
E2R9B6	Uncharacterized protein OS=Canis lupus familiaris GN=FETUB PE=4 SV=1 - [E2R9B6_CANLF]	61.04	1	20	20	284	385	42.3063	5.92236	1.05878	1.03244	1.04561	1.03405	1.00067	1.01736	0.972982	0.859665
E2RJT2	Uncharacterized protein OS=Canis lupus familiaris GN=BST1 PE=4 SV=2 - [E2RJT2_CANLF]	15.05	1	4	4	12	319	35.3646	5.80811	1.01873	0.968281	0.993504	1.04986	1.05966	1.05476	1.06166	0.8653
P19006	Haptoglobin OS=Canis lupus familiaris GN=HP PE=1 SV=2 - [HPT_CANLF]	80.24	3	30	30	2258	329	36.4342	6.0874	1.0496	1.04548	1.04754	1.02911	1.01689	1.023	0.976574	0.869612
F1PW10	Uncharacterized protein OS=Canis lupus familiaris GN=TGFBI PE=4 SV=2 - [F1PW10_CANLF]	12.92	2	8	8	19	650	70.8175	6.53662	0.955072	1.05412	1.0046	0.997097	1.13198	1.06454	1.05967	0.872308
H9GWG4	Uncharacterized protein OS=Canis lupus familiaris GN=ITIH3 PE=4 SV=2 - [H9GWG4_CANLF]	29.21	2	21	21	176	890	99.6307	6.16357	1.02461	1.02501	1.02481	1.03127	0.972945	1.00211	0.97785	0.87314
E2R2F7	Uncharacterized protein OS=Canis lupus familiaris GN=SHBG PE=4 SV=1 - [E2R2F7_CANLF]	42.22	1	12	12	75	405	43.978	6.07471	1.00993	1.00465	1.00729	1.08392	1.0497	1.06681	1.05909	0.874347
F2Z4Q7	Uncharacterized protein OS=Canis lupus familiaris GN=SERPINF1 PE=3 SV=1 - [F2Z4Q7_CANLF]	40.19	1	15	15	144	418	46.4724	7.18115	0.965806	1.00476	0.985285	1.06064	1.02605	1.04335	1.05893	0.87491
Q6EIZ1	Keratin, type II cytoskeletal 2 epidermal OS=Canis lupus familiaris GN=KRT2 PE=2 SV=1 - [K22E_CANLF]	7.58	11	3	5	16	633	64.5264	7.73779	1.2069	1.03565	1.12127	0.971888	1.39873	1.18531	1.05711	0.881351
J9PAA4	Uncharacterized protein OS=Canis lupus familiaris GN=CPN2 PE=4 SV=1 - [J9PAA4_CANLF]	33.27	1	15	15	136	547	59.1545	6.58057	1.07585	1.00289	1.03937	1.03147	1.00873	1.0201	0.98146	0.883114
F1PFM6	Uncharacterized protein OS=Canis lupus familiaris GN=COL6A1 PE=4 SV=2 - [F1PFM6_CANLF]	1.27	1	1	1	4	1026	108.51	5.5415	0.901632	1.12621	1.01392	0.98453	1.00572	0.995126	0.981462	0.88312
E2RPB8	Uncharacterized protein OS=Canis lupus familiaris GN=CLEC3B PE=4 SV=2 - [E2RPB8_CANLF]	45.71	1	7	7	69	175	19.1312	5.5415	1.04263	1.05059	1.04661	1.05294	1.00215	1.02755	0.981784	0.884011
E2REV6	Uncharacterized protein OS=Canis lupus familiaris GN=PTPRG PE=4 SV=2 - [E2REV6_CANLF]	2.15	2	2	2	2	1301	144.829	6.23975	1.15226	1.0545	1.10338	1.17598	0.991393	1.08369	0.982152	0.885025
F1PG39	Uncharacterized protein OS=Canis lupus familiaris GN=ITIH2 PE=4 SV=2 - [F1PG39_CANLF]	37.66	1	30	30	308	948	107.17	7.53271	1.0055	1.02176	1.01363	1.01021	0.98267	0.99644	0.983039	0.887472
J9NY02	Uncharacterized protein OS=Canis lupus familiaris PE=4 SV=1 - [J9NY02_CANLF]	61.43	1	4	7	144	140	15.3888	9.45166	1.03009	1.07446	1.05227	1.04279	1.02609	1.03444	0.983054	0.887515
L7N0J5	Uncharacterized protein OS=Canis lupus familiaris PE=4 SV=1 - [L7N0J5_CANLF]	14.71	1	2	2	8	170	17.903	8.48486	1.05064	1.20525	1.12795	1.11455	1.10534	1.10994	0.984041	0.890237
P01874	Ig mu chain C region OS=Canis lupus familiaris PE=1 SV=1 - [IGHM_CANLF]	10	1	2	3	135	450	48.8646	6.12549	1.11323	1.03902	1.07612	1.20642	1.06261	1.13452	1.05426	0.891472
E2RJY0	Uncharacterized protein OS=Canis lupus familiaris GN=KCTD12 PE=4 SV=1 - [E2RJY0_CANLF]	8.26	1	2	2	4	327	35.8438	5.64307	0.999291	0.694599	0.846945	0.779627	1.00585	0.892736	1.05407	0.892171
E2R913	Uncharacterized protein OS=Canis lupus familiaris GN=CARHSP1 PE=4 SV=1 - [E2R913_CANLF]	10.39	1	1	1	3	154	16.6054	8.20654	0.858198	1.03499	0.946593	1.40279	0.59265	0.997719	1.05401	0.892372
J9NWJ0	Peptidoglycan-recognition protein OS=Canis lupus familiaris GN=PGLYRP1 PE=3 SV=1 - [J9NWJ0_CANLF]	12.24	1	2	2	4	196	21.6569	8.20654	0.9076	0.869006	0.888303	0.988887	0.883564	0.936225	1.05395	0.892592
J9P1F6	Uncharacterized protein OS=Canis lupus familiaris PE=4 SV=1 - [J9P1F6_CANLF]	31.91	1	2	3	77	141	15.1004	8.30908	1.02445	1.07473	1.04959	1.03663	1.0314	1.03401	0.98516	0.893319
F1PF31	Uncharacterized protein OS=Canis lupus familiaris GN=TNC PE=4 SV=1 - [F1PF31_CANLF]	1.57	2	3	3	9	2233	243.686	5.0083	1.15262	1.00725	1.07994	1.03499	1.09473	1.06486	0.98604	0.895744
F1PDJ0	Apolipoprotein C-III OS=Canis lupus familiaris GN=APOC3 PE=4 SV=1 - [F1PDJ0_CANLF]	35	2	4	4	114	100	10.9825	5.37646	0.929298	0.977617	0.953457	1.02293	0.984841	1.00388	1.05289	0.896369
F1PNS6	Uncharacterized protein OS=Canis lupus familiaris GN=PEPD PE=3 SV=2 - [F1PNS6_CANLF]	25.13	1	9	9	37	386	43.151	5.65576	1.05025	1.08949	1.06987	1.0675	1.0445	1.056	0.987037	0.89849
E2RKZ6	Uncharacterized protein OS=Canis lupus familiaris GN=PON3 PE=4 SV=1 - [E2RKZ6_CANLF]	7.06	1	2	2	3	354	39.6775	6.30322	0.947237	0.989028	0.968133	1.00834	1.02694	1.01764	1.05113	0.902642
E2RL35	Phospholipase A2 OS=Canis lupus familiaris GN=PLA2G4F PE=4 SV=1 - [E2RL35_CANLF]	1.41	1	1	1	3	850	95.2711	5.36377	1.08105	1.10849	1.09477	1.10758	1.05783	1.08271	0.988978	0.903828
E2RQ71	Uncharacterized protein OS=Canis lupus familiaris GN=APOM PE=4 SV=2 - [E2RQ71_CANLF]	41.49	1	6	6	41	188	21.4155	6.85889	0.992518	0.963648	0.978083	1.05181	1.00248	1.02714	1.05016	0.906129
F1P6R7	Uncharacterized protein OS=Canis lupus familiaris GN=GSTM4 PE=3 SV=2 - [F1P6R7_CANLF]	14.22	3	2	2	6	218	25.7492	7.47412	1.00094	0.989593	0.995268	0.886693	1.0881	0.987396	0.99209	0.912377
J9JHN3	Uncharacterized protein OS=Canis lupus familiaris PE=4 SV=1 - [J9JHN3_CANLF]	50.38	1	3	5	61	133	14.5132	8.33838	1.03466	1.09695	1.06581	1.119	1.1139	1.11645	1.04751	0.915628
F1PCK2	Uncharacterized protein OS=Canis lupus familiaris GN=A1BG PE=4 SV=2 - [F1PCK2_CANLF]	53.47	1	21	21	672	533	57.8615	6.04932	1.00179	1.05319	1.02749	1.03543	1.00591	1.02067	0.993362	0.915866
E2RBD0	Serum amyloid A protein OS=Canis lupus familiaris GN=LOC476879 PE=3 SV=1 - [E2RBD0_CANLF]	20.77	2	1	3	17	130	14.4693	9.81787	0.466109	0.559356	0.512732	0.499799	0.573994	0.536896	1.04713	0.917019
E2R886	Uncharacterized protein OS=Canis lupus familiaris GN=KNG1 PE=4 SV=2 - [E2R886_CANLF]	32.69	1	14	14	282	416	46.4897	6.91748	0.984128	1.04022	1.01217	1.03313	0.984348	1.00874	0.996606	0.924751
E2RK02	Uncharacterized protein OS=Canis lupus familiaris GN=GPLD1 PE=4 SV=2 - [E2RK02_CANLF]	40.62	1	28	28	231	842	92.7827	6.15088	0.962192	0.952756	0.957474	0.989738	1.00959	0.999666	1.04407	0.928065
Q7M321	Plasmin (Fragments) OS=Canis lupus familiaris PE=4 SV=1 - [Q7M321_CANLF]	70	2	1	8	76	120	13.4782	6.87354	0.99771	1.03143	1.01457	1.13118	0.986848	1.05902	1.04381	0.929
P56595	Apolipoprotein C-I OS=Canis lupus familiaris GN=APOC1 PE=1 SV=1 - [APOC1_CANLF]	31.82	1	6	6	123	88	9.73531	9.40771	0.969883	0.981804	0.975843	1.02787	1.00874	1.0183	1.04351	0.930066
F6Y3P9	Uncharacterized protein OS=Canis lupus familiaris GN=GSN PE=4 SV=1 - [F6Y3P9_CANLF]	39.34	3	30	30	335	783	85.1912	6.50732	1.02805	1.0353	1.03168	1.05545	1.0079	1.03168	1	0.934026
Q6JDI3	Plasminogen (Fragment) OS=Canis lupus familiaris GN=PLG PE=4 SV=1 - [Q6JDI3_CANLF]	20.37	1	1	1	3	54	5.86178	5.10986	1.06727	0.911593	0.989432	1.02232	0.956689	0.989503	1.00007	0.934219
E2RES2	Uncharacterized protein OS=Canis lupus familiaris GN=SERPINC1 PE=3 SV=2 - [E2RES2_CANLF]	60.86	1	31	31	675	465	52.4327	6.69775	1.01423	1.02814	1.02118	1.04528	0.999656	1.02247	1.00126	0.937451
E2RG01	Uncharacterized protein OS=Canis lupus familiaris GN=C7 PE=4 SV=2 - [E2RG01_CANLF]	44.73	1	32	32	142	863	94.8793	6.81494	0.99322	0.985476	0.989348	1.01487	1.04344	1.02916	1.04024	0.941942
E2QZ19	Uncharacterized protein OS=Canis lupus familiaris GN=AFM PE=4 SV=1 - [E2QZ19_CANLF]	59.63	2	37	37	383	602	68.9231	5.26221	0.992704	1.00018	0.99644	1.03733	0.961625	0.999479	1.00305	0.942341
J9P716	Uncharacterized protein OS=Canis lupus familiaris GN=TUBB1 PE=3 SV=1 - [J9P716_CANLF]	4.87	2	1	2	4	596	65.2055	5.78271	1.2059	1.18577	1.19583	0.941813	1.45823	1.20002	1.0035	0.943575
J9NWS3	Keratin, type I cytoskeletal 9 OS=Canis lupus familiaris GN=KRT9 PE=3 SV=1 - [J9NWS3_CANLF]	2.69	4	1	2	9	595	59.3613	5.31299	0.789265	0.764154	0.77671	0.910529	0.648549	0.779539	1.00364	0.943956
E2RQF8	Uncharacterized protein OS=Canis lupus familiaris GN=ECM1 PE=4 SV=2 - [E2RQF8_CANLF]	21.88	1	7	7	23	352	40.2323	7.79639	0.803389	0.852004	0.827696	0.82699	0.893609	0.860299	1.03939	0.945021
F6UVK4	Uncharacterized protein OS=Canis lupus familiaris GN=ENPP2 PE=4 SV=1 - [F6UVK4_CANLF]	5.18	1	4	4	9	888	101.897	7.51807	1.07301	0.89703	0.985021	1.04556	1.00046	1.02301	1.03856	0.94803
E2QV08	Malate dehydrogenase OS=Canis lupus familiaris GN=MDH1 PE=3 SV=2 - [E2QV08_CANLF]	18.97	2	6	6	19	348	38.222	7.94287	0.764302	0.682132	0.723217	0.764724	0.736995	0.750859	1.03822	0.949275
F1PXD6	Uncharacterized protein OS=Canis lupus familiaris GN=PRG4 PE=4 SV=2 - [F1PXD6_CANLF]	10.54	1	9	9	38	854	94.2901	9.64209	1.03146	0.993899	1.01268	1.00361	1.03525	1.01943	1.00666	0.952169
F6UME0	Uncharacterized protein OS=Canis lupus familiaris GN=A2M PE=4 SV=1 - [F6UME0_CANLF]	61.97	2	73	73	1689	1475	165.114	6.7124	1.02426	1.0287	1.02648	1.07096	1.05811	1.06453	1.03707	0.95346
E2R5W6	Uncharacterized protein OS=Canis lupus familiaris GN=GC PE=4 SV=2 - [E2R5W6_CANLF]	65.61	6	35	35	961	474	52.9396	5.32568	1.03183	1.053	1.04242	1.0603	1.0396	1.04995	1.00723	0.953695
F1PAA4	Cadherin-1 OS=Canis lupus familiaris GN=CDH1 PE=4 SV=2 - [F1PAA4_CANLF]	4.35	2	2	2	5	827	91.4279	4.729	1.06895	0.995601	1.03228	1.04577	1.03408	1.03992	1.00741	0.954193
E2QZQ1	Uncharacterized protein OS=Canis lupus familiaris GN=LOC477071 PE=3 SV=1 - [E2QZQ1_CANLF]	49.65	2	33	34	330	705	77.6691	6.88818	1.02726	0.962647	0.994954	0.993246	1.06995	1.0316	1.03683	0.954356
F1P6H6	Uncharacterized protein OS=Canis lupus familiaris GN=CCDC96 PE=4 SV=2 - [F1P6H6_CANLF]	1.72	1	1	1	3	348	41.0333	7.2251	1.11653	0.955347	1.03594	1.08908	1.05528	1.07218	1.03498	0.961093
E7BUP9	Proteasome subunit beta type OS=Canis lupus familiaris GN=PSMB7 PE=2 SV=1 - [E7BUP9_CANLF]	3.61	3	1	1	2	277	29.9932	7.6792	1.03477	0.942145	0.988457	0.918435	1.07818	0.998307	1.00997	0.961126
F6V8B5	Uncharacterized protein OS=Canis lupus familiaris PE=4 SV=1 - [F6V8B5_CANLF]	33.82	2	3	3	28	136	14.529	7.97217	0.997272	1.10229	1.04978	1.16823	1.0043	1.08626	1.03475	0.961937
F1PNV5	Prekallikrein OS=Canis lupus familiaris GN=KLKB1 PE=2 SV=2 - [F1PNV5_CANLF]	28.93	2	15	17	62	636	70.8423	7.95752	0.982792	0.956134	0.969463	0.996988	1.00927	1.00313	1.03473	0.962034
J9P4Z4	Dipeptidase OS=Canis lupus familiaris GN=DPEP3 PE=3 SV=1 - [J9P4Z4_CANLF]	5.47	1	2	2	4	512	56.6114	9.31982	0.954919	1.00511	0.980016	1.14209	0.838766	0.990428	1.01062	0.962909
E2RMF9	Uncharacterized protein OS=Canis lupus familiaris GN=SERPINA5 PE=3 SV=1 - [E2RMF9_CANLF]	35.38	1	11	11	59	407	45.7925	8.44092	0.905961	0.910659	0.90831	0.955367	0.918064	0.936716	1.03127	0.974693
J9PB28	Uncharacterized protein OS=Canis lupus familiaris GN=FGL2 PE=4 SV=1 - [J9PB28_CANLF]	8.62	1	4	4	11	441	48.977	7.03467	1.03428	1.04728	1.04078	1.0679	1.07745	1.07268	1.03065	0.976999
J9NWG4	Uncharacterized protein OS=Canis lupus familiaris GN=LOC479260 PE=4 SV=1 - [J9NWG4_CANLF]	38.68	4	10	10	46	243	25.707	7.28369	0.927263	0.976085	0.951674	1.00457	0.956855	0.980713	1.03051	0.977485
F1P8T3	Uncharacterized protein OS=Canis lupus familiaris GN=SEMA7A PE=4 SV=2 - [F1P8T3_CANLF]	3.57	1	1	1	2	561	63.6262	6.75635	0.934692	0.963303	0.948997	1.00499	0.923498	0.964247	1.01607	0.977614
F1P9E5	Platelet-activating factor acetylhydrolase OS=Canis lupus familiaris GN=PLA2G7 PE=4 SV=1 - [F1P9E5_CANLF]	36.26	2	13	13	46	444	50.1183	6.48096	0.963543	1.02601	0.994775	1	1.04957	1.02479	1.03017	0.978749
F1Q418	Uncharacterized protein OS=Canis lupus familiaris GN=ITIH1 PE=4 SV=2 - [F1Q418_CANLF]	43.52	1	33	33	421	910	100.935	6.97607	0.99121	1.00876	0.999985	1.05955	1.00048	1.03001	1.03003	0.979272
F1PD34	Uncharacterized protein OS=Canis lupus familiaris GN=SPP2 PE=4 SV=2 - [F1PD34_CANLF]	11.06	2	2	2	10	199	22.7462	7.18115	0.960848	0.879227	0.920037	0.798006	1.07361	0.935806	1.01714	0.980498
E2R141	Uncharacterized protein OS=Canis lupus familiaris GN=C8B PE=4 SV=1 - [E2R141_CANLF]	39.66	1	18	18	95	590	66.9556	7.79639	1.03165	0.954306	0.99298	0.996675	1.02347	1.01007	1.01722	0.980703
E2RNL8	Uncharacterized protein OS=Canis lupus familiaris GN=APOD PE=3 SV=2 - [E2RNL8_CANLF]	28.78	2	7	7	62	205	23.1768	5.18604	0.991551	1.00008	0.995818	1.04235	0.984146	1.01325	1.01751	0.981483
E2QW82	Uncharacterized protein OS=Canis lupus familiaris GN=MMP19 PE=3 SV=2 - [E2QW82_CANLF]	17.57	1	8	8	16	569	64.0522	7.1958	0.99604	1.02416	1.0101	1.06726	0.989505	1.02838	1.0181	0.983077
F1Q185	Uncharacterized protein OS=Canis lupus familiaris PE=4 SV=2 - [F1Q185_CANLF]	29.33	1	3	3	20	150	16.0739	5.74463	0.998413	1.10718	1.0528	1.12043	1.02457	1.0725	1.01871	0.984727
P49822	Serum albumin OS=Canis lupus familiaris GN=ALB PE=1 SV=3 - [ALBU_CANLF]	90.63	4	4	79	12581	608	68.56	5.69385	0.927756	0.955753	0.941754	0.979995	0.939258	0.959627	1.01898	0.985442
J9P7Q8	Carboxylic ester hydrolase OS=Canis lupus familiaris GN=CEL PE=3 SV=1 - [J9P7Q8_CANLF]	20.22	2	12	12	47	643	69.925	6.31592	0.954145	1.04604	1.00009	1.01591	1.02287	1.01939	1.0193	0.986306
E2R2C3	Glucose-6-phosphate isomerase OS=Canis lupus familiaris GN=GPI PE=3 SV=1 - [E2R2C3_CANLF]	11.47	1	5	5	11	558	62.7981	7.92822	0.866209	0.767817	0.817013	0.830134	0.847265	0.8387	1.02654	0.992109
J9P028	Glutathione peroxidase OS=Canis lupus familiaris GN=GPX3 PE=3 SV=1 - [J9P028_CANLF]	60.78	4	9	9	106	153	17.3259	7.97217	0.951585	0.9938	0.972692	1.01837	0.976293	0.997333	1.02533	0.996583
J9P5I4	Uncharacterized protein OS=Canis lupus familiaris PE=4 SV=1 - [J9P5I4_CANLF]	7.97	1	1	1	9	138	15.3026	8.68994	1.13806	1.02724	1.08265	1.14455	1.07305	1.1088	1.02415	0.999319
Q8HY81	Cathepsin S OS=Canis lupus familiaris GN=CTSS PE=2 SV=1 - [CATS_CANLF]	3.93	2	1	1	4	331	37.2041	8.1333	1.01861	1.06884	1.04373	1.25157	0.88684	1.0692	1.02441	1
